# Supplementary material
Source: publisher site journal article supplement (https://static.cambridge.org/content/id/urn:cambridge.org:id:article:S1743921319004423/resource/name/S1743921319004423supp001.pdf)
Supplement: Supplementary file 1 [file S1743921319004423supp001.pdf]

# FM8: New Insights in Extragalactic Magnetic Fields

## Content

|                                                                                                                                                                                                                                         |           |
|-----------------------------------------------------------------------------------------------------------------------------------------------------------------------------------------------------------------------------------------|-----------|
| <b>D.G. Yamazaki</b> , <i>CMB weak lensing with the primordial magnetic field</i> .....                                                                                                                                                 | <b>3</b>  |
| <b>M. Langer, J.-B. Durrive</b> , <i>Magnetizing the Intergalactic Medium during Reionization</i> .....                                                                                                                                 | <b>7</b>  |
| <b>D. Sokoloff</b> , <i>Small-scale dynamo as a mechanism for excitation of extragalactic magnetic fields</i> .....                                                                                                                     | <b>11</b> |
| <b>P. Barai, E.M. de Gouveia Dal Pino</b> , (on behalf of CTA Collaboration), <i>Large-Scale Diffuse Intergalactic Magnetic Fields Constraints With the Cherenkov Telescope Array</i> .....                                             | <b>15</b> |
| <b>R.A. Batista, E. M. de Gouveia Dal Pino, K. Dolag, S. Hussain</b> , <i>Cosmic-Ray propagation in the turbulent intergalactic medium</i> .....                                                                                        | <b>19</b> |
| <b>A. Seta, A. Shukurov, P.J. Bushby, T.S. Wood</b> , <i>On energy equipartition between cosmic rays and magnetic fields</i> .....                                                                                                      | <b>23</b> |
| <b>F. Loi, M. Murgia, F. Govoni, V. Vacca, I. Prandoni, H. Li, L. Feretti, G. Giovannini</b> , <i>Simulations of the polarized sky for the SKA</i> .....                                                                                | <b>27</b> |
| <b>Y.K. Ma, S.A. Mao, J. Stil, A. Basu, J. West, C. Heiles, A. S. Hill, S. K. Betti</b> , <i>From the NVSS RM Catalogue to Future Polarisation Surveys</i> ....                                                                         | <b>31</b> |
| <b>L. Chamandy, A. Shukurov, A.R. Taylor</b> , <i>New Insights on Galactic Dynamos</i> . . .                                                                                                                                            | <b>35</b> |
| <b>F.S. Tabatabaei</b> , <i>The Role of Magnetic Fields in The Evolution of Galaxies</i> ...                                                                                                                                            | <b>39</b> |
| <b>C.L. Sarazin, R. Vijayaraghavan, P.M. Ricker</b> , <i>Magnetic Fields and Ram Pressure Stripping of Galaxies in Clusters</i> .....                                                                                                   | <b>43</b> |
| <b>M. Ramos-Martínez, G. Gómez</b> , <i>Magnetic fields in simulations of ram pressure stripped galaxies</i> .....                                                                                                                      | <b>47</b> |
| <b>A. Basu, S.A. Mao, A. Fletcher, N. Kanekar, A. Shukurov, D. Schnitzeler, V. Vacca, H. Junklewitz</b> , <i>Statistical properties of Faraday rotation measure from large-scale magnetic fields in intervening disc galaxies</i> ..... | <b>51</b> |
| <b>L. Rudnick</b> , <i>Optimizing Faraday Background Grids</i> .....                                                                                                                                                                    | <b>55</b> |
| <b>B. Ruiz-Granados, E. Battaner, E. Florido, J.A. Rubiño-Martín</b> , <i>Magnetic fields at the epoch of Reionization</i> .....                                                                                                        | <b>59</b> |
| <b>S. Hackstein, F. Vazza, M. Brüggen, J.G. Sorce, S. Gottlöber</b> , <i>Propagation of UHECRs in the local Universe and origin of cosmic magnetic fields</i> ....                                                                      | <b>61</b> |

|                                                                                                                                                                                                                                                                                                                                                       |           |
|-------------------------------------------------------------------------------------------------------------------------------------------------------------------------------------------------------------------------------------------------------------------------------------------------------------------------------------------------------|-----------|
| <b>M. Cau, G. Giovannini, A. Ignesti</b> , <i>Statistics and new detections of diffuse radio sources in galaxy clusters</i> .....                                                                                                                                                                                                                     | <b>63</b> |
| <b>P. Domínguez-Fernández, F. Vazza, M. Brüggen</b> , <i>Spectral analysis of magnetic fields in simulated galaxy clusters</i> .....                                                                                                                                                                                                                  | <b>65</b> |
| <b>J.M. Stil, on behalf of the CHANG-ES collaboration</b> , <i>CHANG-ES: an overview</i> . . . . .                                                                                                                                                                                                                                                    | <b>67</b> |
| <b>G. Heald, and the QUOCKA Team</b> , <i>The QUOCKA Survey: Early Results</i> .                                                                                                                                                                                                                                                                      | <b>69</b> |
| <b>M. Zajaček, V. Karas</b> , <i>Magnetized stars embedded in AGN accretion disks and tori</i> . . . . .                                                                                                                                                                                                                                              | <b>71</b> |
| <b>A. Janiuk, J. Mortier, K. Sapountzis</b> , <i>Variability of magnetically-dominated jets in blazars and gamma ray bursts</i> .....                                                                                                                                                                                                                 | <b>73</b> |
| <b>R. Beck, E. M. Berkhuijsen</b> , <i>Magnetic Fields and Cosmic Ray Diffusion in M 31</i> . . . . .                                                                                                                                                                                                                                                 | <b>75</b> |
| <b>C. Horellou, A. Neld, D.D. Mulcahy, R. Beck, S. Bourke, T.D. Carozzi, K.T. Chyży, J.E. Conway, J.S. Farnes, A. Fletcher, M. Haverkorn, G. Heald, A. Horneffer, B. Nikiel-Wroczyński, R. Paladino, S.S. Sridhar, C.L. Van Eck</b> , <i>Reliable detection and characterization of low-frequency polarized sources in the LOFAR M 51 field</i> ..... | <b>77</b> |
| <b>L.F.S. Rodrigues, L. Chamandy, A. Shukurov, C. M.Baugh, A.R. Taylor</b> , <i>The evolution of large scale magnetic fields in spiral galaxies</i> .....                                                                                                                                                                                             | <b>79</b> |
| <b>J.F. Hollins, G.R. Sarson, A. Shukurov, A. Fletcher, F.A. Gent</b> , <i>The supernova-regulated ISM. Space- and time-correlations</i> .....                                                                                                                                                                                                        | <b>81</b> |
| <b>A. Shukurov, C.C. Evirgen, A. Fletcher, P.J. Bushby, F.A. Gent</b> , <i>Magnetic field effects on the ISM structure and galactic outflows</i> .....                                                                                                                                                                                                | <b>83</b> |
| <b>M. Krause, S.C. Mora-Partiarroyo, P. Schmidt</b> , <i>Magnetic fields and CR propagation in the halos of spiral galaxies</i> .....                                                                                                                                                                                                                 | <b>85</b> |
| <b>E. Lopez, J. Armijos, M. Llerena, F. Aldaz</b> , <i>Magnetic field constraint in the outskirts of spiral galaxies</i> .....                                                                                                                                                                                                                        | <b>87</b> |
| <b>Y. Stein, R.-J. Dettmar, J. Irwin, and the CHANG-ES Team</b> <i>The CHANG-ES Galaxy NGC 4666</i> .....                                                                                                                                                                                                                                             | <b>89</b> |
| <b>S. Sur</b> , <i>Faraday rotation from magnetic fields in young galaxies</i> .....                                                                                                                                                                                                                                                                  | <b>91</b> |

# CMB weak lensing with the primordial magnetic field

Dai G. Yamazaki<sup>1,2</sup>

<sup>1</sup>Ibaraki University, 2-1-1, Bunkyo, Mito, 310-8512, Japan

<sup>2</sup>National Astronomical Observatory of Japan, Mitaka, Tokyo 181-8588, Japan  
email: yamazaki.dai@nao.ac.jp

**Abstract.** We illustrate that a primordial magnetic field (PMF) suppresses the cosmic microwave background (CMB) B mode from the weak lensing (WL) effect. The WL effect is dependent on the lensing potential (LP) from the matter perturbations. A distribution of the matter perturbations on the cosmological scales is given by the matter power spectrum (MPS). Therefore, the WL effect on the CMB B mode is affected by the MPS. The CMB B mode, provides important information on the background gravitational waves, the inflation theory, the matter density fluctuations and the structure formation in the cosmological scale through the cosmological parameter search. If we precisely research these topics and correctly constrain the cosmological parameters from the cosmological observations including the CMB B mode, we should consider the background PMF correctly.

---

## 1. Introduction

Magnetic fields with strength in the order of  $1 \mu\text{G}$  ( $= 10^{-6} \text{ G}$ ) are observed in the typical subgalaxy to cluster scale by Faraday rotation and synchrotron emission (Neronov and Vovk 2010, Vovk et al. 2012, Feretti et al. 2012). The primary origin of these magnetic fields is the primordial magnetic field (PMF). PMF is assumed to be homogeneous and stochastic with comoving strength in the order of  $1a^{-2} \text{ nG}$  ( $1 \text{ nG} = 10^{-9} \text{ G}$ ), where  $a$  is the scale factor. If this PMF is generated before the recombination and it evolves into the observed magnetic fields by the isotropic collapse of the density fields in the early Universe, then the observed magnetic fields in the cosmological scales can be explained (Grasso and Rubinstein 2001, Yamazaki et al. 2010a, Kandus et al. 2011, Yamazaki et al. 2012) and PMF parameters have been constrained by using the cosmological observation datasets (Yamazaki et al. 2005, Lewis 2004, Yamazaki et al. 2006a, Yamazaki et al. 2008a, Kahniashvili et al. 2009, Yamazaki et al. 2010b, Kahniashvili et al. 2010, Paoletti and Finelli 2011, Yamazaki and Kusakabe 2012, Shaw and Lewis 2012, Yamazaki et al. 2013, Paoletti and Finelli 2013, Shiraishi 2013, Yamazaki et al. 2014, Planck Collaboration et al. 2016a, Zucca et al. 2017).

There are two kinds of PMF effects on the fluctuations of the CMB and the matter power spectrum (MPS). The first effect is due to the first perturbation source from the PMF in the linear perturbative equations. Therefore, this PMF effect is called “the perturbative PMF effect” in this article. The perturbative PMF effect generates fluctuations of CMB and MPS in smaller scales corresponding to  $k \geq 0.1 h\text{Mpc}^{-1}$  (Yamazaki et al. 2006b, Yamazaki et al. 2008b, Yamazaki et al. 2010b, Yamazaki et al. 2011), where  $h$  is the Hubble parameter in units of  $100 \text{ km/s/Mpc}$ .

The second effect is due to the ensemble energy density of the PMF because it is considered a nonperturbative source in linear perturbative theory. Therefore, we call it “the background PMF effect”. The background PMF changes the features of the CMB (Yamazaki 2014) and MPS (Yamazaki 2016). The peak positions of the CMB temperature

fluctuations and the MPS shift to larger scale because of the background PMF (Yamazaki 2014, Yamazaki 2016).

We adopt the flat and  $\Lambda$  CDM model, and assume that the PMF is generated well before the recombination epoch, e.g., the inflation epoch, and that it is stochastic homogeneous, isotropic, and random. A PMF mode in this article is defined by Yamazaki(2018), and the numerical formulation of the PMF spectra from Yamazaki et al. (2008b). We adopt the cosmological parameters determined by the Planck 2016 (TT + lowP + lensing in Table 4 of Planck Collaboration et al. 2016b). We modify CAMB code of Lewis et al. (2000) for computing the lensing potential and the CMB B mode with PMF effects.

## 2. Lensing potential and weak lensing in the PMF

The WL effect depends on the lensing potential (LP) and the spectrum of the LP  $C_\ell^{r\psi}$  depends on the MPS (Lewis and Challinor 2006, Yamazaki 2018). From the PMF effects on the MPS, the LP spectra with the PMF are as shown in panels (a-1) and (a-2) of Fig. 1, where  $n_B$  is the spectrum index of the PMF,  $B_\lambda = |\mathbf{B}_\lambda|$  is the comoving field strength by smoothing over a Gaussian sphere of radius  $\lambda = 1$  Mpc ( $k_\lambda = 2\pi/\lambda$ ). Background PMFs shift the peak positions  $\ell_P$  of the LP spectra to smaller multipoles (larger scales) and suppress the amplitudes for  $\ell \gtrsim \ell_P$ . The WL effect on the CMB B mode is due to the LP; hence, the PMFs affect the CMB B mode owing to WL through the LP [Panels (b-1) and (b-2) in Fig. 1]. To analyze the WL effect on the CMB B mode owing only to the LP with the PMFs, the CMB B mode spectra of vector and tensor sources are not included in panels (b-1) and (b-2) of Fig. 1. If the background PMF effect for estimating the MPS is not considered, the LP spectra and CMB B mode from the WL effect with the PMF in smaller multipoles remain nearly unchanged like the MPS without the background PMF (Yamazaki 2018). In fact, the overall PMF effect suppresses the PL spectra and the CMB B mode owing to WL for  $\ell > 100$  as shown in Fig. 1.

Unlike the MPS and the LP spectrum, the CMB B mode from the perturbative PMF effect has two kind modes: vector and tensor mode. The vector and tensor CMB modes from the perturbative PMF effect directly increase the amplitude of the CMB B mode (Durrer et al. 2000, Mack et al. 2002, Yamazaki et al. 2010b, Yamazaki et al. 2012, Shaw and Lewis 2012). The tensor CMB B mode from the perturbative PMF is much smaller than the CMB B mode from the WL effect, whereas the CMB B mode of the vector mode from the perturbative PMF effect corresponds to the CMB B mode from the WL effect for hundreds of multipoles. In fact, as shown in panel (c) of Fig. 1 for  $\ell > 800$ , it directly increases the amplitude of the CMB B mode spectra and dominates the spectra. However, because the error bars of the datasets for  $\ell > 800$  are large, it is difficult to constrain the parameters of the PMF based on the observation datasets. In addition, the CMB B mode from the perturbative PMF effect for  $\ell < 400$ , where the observational data points have smaller errors from BK14 (BICEP2 Collaboration et al. 2016), is too small to effectively constrain the PMF parameters. Nevertheless, the background PMF effect suppresses the CMB B mode owing to WL in the effective range of BK14 as shown in panel (c) of Fig. 1. Thus, if we use the observational CMB B mode datasets for  $\ell < 400$ , the PMF parameters are constrained.

## 3. Constraints on the PMF parameters

Finally, although preliminary results, we introduce a comparison of constraints on PMF parameters with and without  $\rho_{\text{PMF}}$ . Using the Planck (Planck Collaboration et al. 2016b) and BK14 data sets and the MCMC method (Lewis and Bridle 2002), the power law

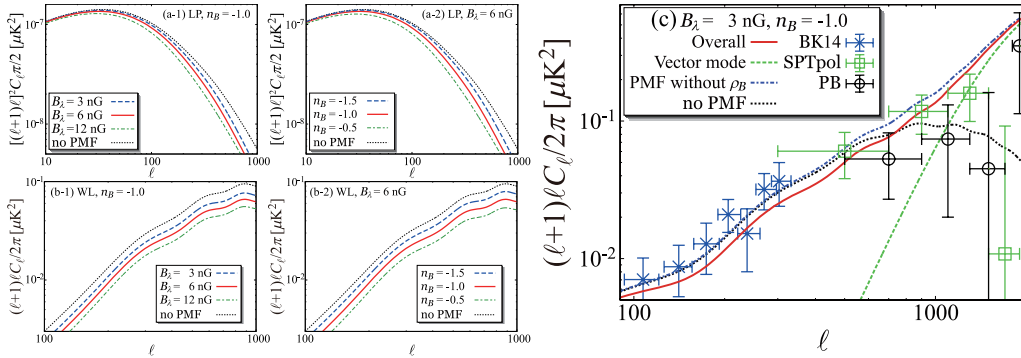

**Figure 1.** PMF effects on the LP spectra (panels (a-1), (a-2)) and CMB B modes owing to WL (panels (b-1), (b-2)). Panel (c) shows that PMF effects on the CMB B mode for fixed PMF parameters  $(B_\lambda, n_B) = (3 \text{ nG}, -1.0)$ . All curves are indicated in the legend box in this figure. The tensor-to-scalar ratio  $r$  is 0.05. The dots with error bars are the CMB B mode measurements from BICEP2/Keck (BK14) (BICEP2 Collaboration et al. 2016), POLARBEAR (PB) (The POLARBEAR Collaboration et al. 2017), and SPTpol (Keisler et al. 2015), as shown by the legends. The uncertainties of the error bars correspond to  $1\sigma$  (68.3% confidence level).

index of the PMF with the background PMF is constrained  $n_B < -1.8$ , which is lower than a result without the background PMF ( $n_B < -1.5$ ). Since the energy density of the background PMF is dependent on the power-law index  $n_B$  and becomes much bigger with higher  $n_B$  from Eq. (1) in Yamazaki(2018), the effects of the PMF of bigger  $n_B$  on the CMB B mode are not negligible for a wider range of multipoles (Fig. 1). Therefore  $n_B$  can be constrained more strongly from the CMB B mode with  $\rho_{\text{PMF}}$ .

#### 4. Summary

It has been known that the vector mode from the perturbative PMF effect increases the CMB B mode for large multipoles, e.g., more than hundreds multipoles. In this article, we show that, as in the background PMF effect on the MPS, the background PMF effect suppresses the LP spectrum for wider range of multipole. Since the CMB B mode owing to WL depends on the LP spectrum, the background PMF effect indirectly suppresses it for wider range of multipole. We also show that we expect to strongly constrain the PMF parameters from observational datasets at  $\ell < 400$ , which have relatively smaller errors, if we correctly consider the background PMF effect on the CMB B mode. The magnetic field affects the physical process at wide scale ranges in the Universe. However, studies of magnetic fields on the cosmological scales are less active because it is difficult to directly observe the magnetic fields in cosmological scales and evaluate theoretical models considering magnetic fields with less observation and results. If we adopt the background PMF effects on the CMB B mode and constrain the PMF parameters in the CMB B mode with observations having smaller errors, we can promote the study of PMF in cosmology.

#### Acknowledgements

This work has been supported in part by Grants-in-Aid for Scientific Research (Grant No. 25871055) of the Ministry of Education, Culture, Sports, Science and Technology of Japan.

## References

- BICEP2 Collaboration, Keck Array Collaboration, P. A. R. Ade, Z. Ahmed, R. W. Aikin, K. D. Alexander, D. Barkats, S. J. Benton, C. A. Bischoff, J. J. Bock, et al., *Phys. Rev. Lett.* **116**, 031302 (2016).
- R. Durrer, P. G. Ferreira, and T. Kahniashvili, *Phys. Rev.* **D 61**, 043001 (2000).
- L. Feretti, G. Giovannini, F. Govoni, and M.urgia, *The Astronomy and Astrophysics Review* **20**, 54 (2012).
- D. Grasso and H. R. Rubinstein, *Phys. Rept.* **348**, 163 (2001).
- T. Kahniashvili, Y. Maravin, and A. Kosowsky, *Phys. Rev.* **D80**, 023009 (2009).
- T. Kahniashvili, A. G. Tevzadze, S. K. Sethi, K. Pandey, and B. Ratra, *Phys. Rev. D* **82**, 083005 (2010).
- A. Kandus, K. E. Kunze, and C. G. Tsagas, *Physics Reports*, **505**, 1 (2011).
- R. Keisler, S. Hoover, N. Harrington, J. W. Henning, P. A. R. Ade, K. A. Aird, J. E. Austermann, J. A. Beall, A. N. Bender, B. A. Benson, et al., *Astrophys. J.* **807**, 151 (2015).
- A. Lewis, A. Challinor, and A. Lasenby, *Astrophys. J.* **538**, 473 (2000).
- A. Lewis and S. Bridle, *Phys. Rev.* **D 66**, 103511 (2002).
- A. Lewis, *Phys. Rev.* **D 70**, 043011 (2004).
- A. Lewis and A. Challinor, *Phys. Rep.* **429**, 1 (2006).
- A. Mack, T. Kahniashvili, and A. Kosowsky, *Phys. Rev.* **D 65**, 123004 (2002).
- A. Neronov and I. Vovk, *Science* **328**, 73 (2010).
- D. Paoletti and F. Finelli, *Phys. Rev.* pp. 123533 (2011).
- D. Paoletti and F. Finelli, *Physics Letters B* **726**, 45 (2013).
- Planck Collaboration, P. A. R. Ade, N. Aghanim, M. Arnaud, F. Arroja, M. Ashdown, J. Aumont, C. Baccigalupi, M. Ballardini, A. J. Banday, et al., *Astron. & Astrophys.* **594**, A19 (2016a).
- Planck Collaboration, P. A. R. Ade, N. Aghanim, M. Arnaud, M. Ashdown, J. Aumont, C. Baccigalupi, A. J. Banday, R. B. Barreiro, J. G. Bartlett, et al., *Astron. & Astrophys.* **594**, A13 (2016b).
- The POLARBEAR Collaboration, P. A. R. Ade, M. Aguilar, Y. Akiba, K. Arnold, C. Baccigalupi, D. Barron, D. Beck, F. Bianchini, D. Boettger, et al., *Astrophys. J.* **848**, 121 (2017).
- J. R. Shaw and A. Lewis, *Phys. Rev. D* **86**, 043510 (2012).
- M. Shiraishi, *JCAP* **11**, 006 (2013).
- I. Vovk, A. M. Taylor, D. Semikoz, and A. Neronov, *Astrophys. J.* **747**, L14 (2012).
- D. G. Yamazaki, K. Ichiki, and T. Kajino, *Astrophys. J.* **625**, L1 (2005).
- D. G. Yamazaki, K. Ichiki, T. Kajino, and G. J. Mathews, *Astrophys. J.* **646**, 719 (2006a).
- D. G. Yamazaki, K. Ichiki, K.-I. Umezu, and H. Hanayama, *Phys. Rev. D* **74**, 123518 (2006b).
- D. G. Yamazaki, K. Ichiki, T. Kajino, and G. J. Mathews, *Phys. Rev.* **D 78**, 123001 (2008a).
- D. G. Yamazaki, K. Ichiki, T. Kajino, and G. J. Mathews, *Phys. Rev.* **D 77**, 043005 (2008b).
- D. G. Yamazaki, K. Ichiki, T. Kajino, and G. J. Mathews, *Advances in Astronomy* **2010**, 586590 (2010a).
- D. G. Yamazaki, K. Ichiki, T. Kajino, and G. J. Mathews, *Phys. Rev.* **D 81**, 023008 (2010b).
- D. G. Yamazaki, K. Ichiki, and K. Takahashi, *Phys. Rev. D* **84**, 123006 (2011).
- D. G. Yamazaki and M. Kusakabe, *Phys. Rev. D* **86**, 123006 (2012).
- D. G. Yamazaki, T. Kajino, G. J. Mathews, and K. Ichiki, *Phys. Rep.* **517**, 141 (2012).
- D. G. Yamazaki, K. Ichiki, and K. Takahashi, *Phys. Rev. D* **88**, 103011 (2013).
- D. G. Yamazaki, M. Kusakabe, T. Kajino, G. J. Mathews, and M.-K. Cheoun, *Phys. Rev. D* **90**, 023001 (2014).
- D. G. Yamazaki, *Phys. Rev. D* **89**, 083528 (2014).
- D. G. Yamazaki, *Phys. Rev. D* **93**, 043004 (2016).
- D. G. Yamazaki, *Phys. Rev. D* **97**, 103525 (2018).
- A. Zucca, Y. Li, and L. Pogosian, *Phys. Rev. D* **95**, 063506 (2017).

# Magnetising the Cosmic Web during Reionisation

Mathieu Langer<sup>1</sup> and Jean-Baptiste Durrive<sup>2</sup>

<sup>1</sup>Institut d'Astrophysique Spatiale, CNRS, UMR 8617, Univ. Paris-Sud, Université  
Paris-Saclay, bât. 121, 91405 Orsay Cedex, France  
email: [mathieu.langer@ias.u-psud.fr](mailto:mathieu.langer@ias.u-psud.fr)

<sup>2</sup>Department of Physics and Astrophysics, Nagoya University, Nagoya 464-8602, Japan  
present email: [jdurrive@irap.omp.eu](mailto:jdurrive@irap.omp.eu)

**Abstract.** Evidence repeatedly suggests that cosmological sheets, filaments and voids may be substantially magnetised today. The origin of magnetic fields in the intergalactic medium is however currently uncertain. We discuss a magnetogenesis mechanism based on the exchange of momentum between hard photons and electrons in an inhomogeneous intergalactic medium. Operating near ionising sources during the epoch of reionisation, it is capable of generating magnetic seeds of relevant strengths over scales comparable to the distance between ionising sources. Furthermore, when the contributions of all ionising sources and the distribution of gas inhomogeneities are taken into account, it leads, by the end of reionisation, to a level of magnetisation that may account for the current magnetic fields strengths in the cosmic web.

**Keywords.** Magnetic fields, cosmology: theory, large-scale structure of universe

---

## 1. Introduction

The Universe seems to be magnetised virtually on all scales. The origin of the cosmological magnetic fields in particular remains unsettled, despite the many models that have been proposed (see [Kulsrud and Zweibel 2008](#); [Ryu \*et al.\* 2012](#); [Widrow \*et al.\* 2012](#); [Durrer and Neronov 2013](#); [Subramanian 2016](#)). Many of these rely on beyond-the-standard-model physics possibly operating in the early Universe. In the post-recombination Universe, plasma instabilities (e.g. [Gruzinov 2001](#); [Schlickeiser 2012](#)), the Biermann battery (e.g. [Pudritz and Silk 1989](#); [Subramanian \*et al.\* 1994](#); [Ryu \*et al.\* 1998](#)) and momentum transfer effects (e.g. [Mishustin and Ruzmaikin 1972](#); [Harrison 1973](#); [Saga \*et al.\* 2015](#)) can also generate magnetic fields. Whether all these mechanisms are suitable for explaining the origin of the fields permeating the cosmic web is debated, and will be answered thanks to large radio telescopes (see [Beck 2015](#) and pages 369–597 of [Bourke \*et al.\* 2015](#)).

We here summarise the basics of an astrophysical mechanism, based on the photoionization of the IGM, that is bound to have contributed to the magnetisation of the cosmic web during the epoch of reionisation. Its principles have been explored in [Durrive and Langer \(2015\)](#), and the resulting, average strength of the field in the Universe by the end of reionisation has been estimated in [Durrive \*et al.\* \(2017\)](#).

## 2. Outline of the mechanism

The “recipe” for the generation of magnetic fields is, in principle, simple. First, some mechanism must spatially separate positive and negative electric charge carriers. Second, this separation must be sustained so that a large scale electric field is created. Third, by

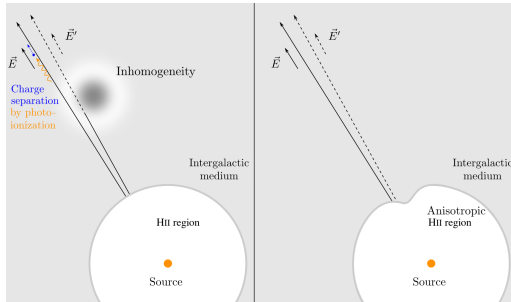

**Figure 1.** Inhomogeneities at the origin of rotational electric fields.

virtue of Faraday’s law, this electric field must possess a curl. The question of astrophysical magnetogenesis thus essentially boils down to identifying the propitious epochs and environments for such rotational electric fields to emerge.

Cosmological reionisation is one such epoch. The immediate surroundings of luminous sources are ionised forming HII regions. Higher energy photons penetrate beyond the edge of such bubbles into the neutral IGM. There, occasionally, they hit atoms and eject new electrons. As long as the sources shine, the resulting charge separation creates an electric field. Now, in case of perfect local isotropy, the electric field is curl-free. However, local isotropy is broken (see fig. 1). First, the IGM is inhomogeneous. Any overdensity (underdensity) locally enhances (lessens) the process: behind it, the strength of the electric field is smaller (larger) than along photon trajectories that miss density contrasts. The electric field varies *across* photon trajectories, and thus possesses a curl. Second, HII bubbles are aspherical, and the flux of hard photons that escape into the IGM is anisotropic.

In [Durrive and Langer \(2015\)](#), we analysed in detail this mechanism. We obtained the expression for the generated magnetic field, and examined its spatial distribution and strengths. We considered three source types: population III stars, primeval galaxies, and quasars. We modelled a clump in the IGM by a compensated overdensity (see fig. 1 left), and assumed a source lifetime of 100 Myr. Population III star clusters generate relatively stronger fields, on distances (1 – 2 kpc) shorter than half their physical mean separation ( $\sim 10$  kpc). These sources thus leave a large fraction of the IGM unmagnetised. Rare, luminous quasars magnetise less but over much larger distances (several Mpc), comparable to half their separation. Primeval galaxies combine modestly high amplitudes, and reasonably large scales (tens of kpc) that are similar to half their separation.

### 3. Average Magnetic Energy Density seeded in the IGM

We estimated in [Durrive \*et al.\* \(2017\)](#) the level of global magnetisation thus reached in the Universe by the end of reionisation. The result depends on the distribution of the ionising sources, their spectra, the epochs at which they shine, and on the density clumps in the IGM. We used the [Press and Schechter \(1974\)](#) formalism to model the statistical distribution of sources and overdensities. We focused on primeval galaxies, probably the dominant contributors to reionisation.

The details, illustrated in fig. 2, consist in the following steps:

(a) First, we considered an isolated source and a gas inhomogeneity in its vicinity. We obtained a convenient expression for the magnetic energy density  $E_m(D)$  associated to any cloud of mass  $m$  at a given distance  $D$  of the ionising source.

(b) Second, we summed the effect of all the clouds around the source contained in a



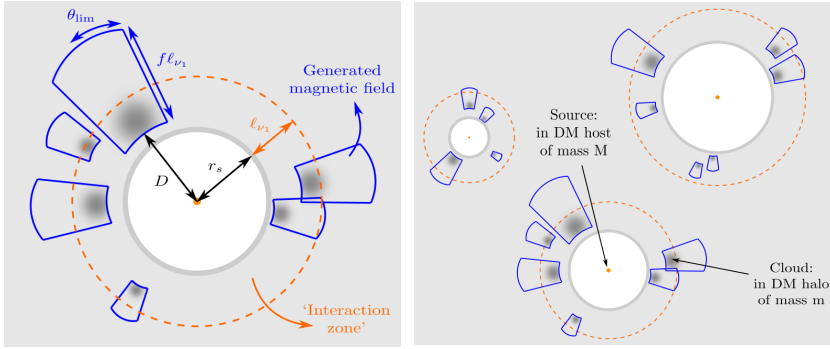

**Figure 2.** Estimating the global magnetisation level of the IGM. See text for details.

DM halo of mass  $M$ . It contributes by injecting a magnetic energy

$$E_M = \int_{r_s}^{r_s + \ell_{\nu_1}} \int_{m_{\min}}^{m_{\max}} E_m(D) d^2P(D, m|M) \quad (3.1)$$

where  $d^2P(D, m|M)$  is the probability for a DM cloud of mass  $m$  to be in a spherical shell of volume  $4\pi D^2 dD$  at distance  $D$ . We considered only the clouds within an ‘interaction zone’ set by the photon mean free path  $\ell_{\nu_1}$  beyond which the mechanism is not efficient.

(c) Third, we integrated the energy density  $E_M$  over the DM halos containing ionising sources. As HII bubbles start to overlap, the efficiency of magnetic field generation decreases as reionisation proceeds. Hence, we weighed the contribution of sources by a factor  $1 - Q_i(z)$  accounting for the ionised volume filling factor at redshift  $z$ . The mean comoving magnetic energy density finally reads

$$\frac{B_c^2(z)}{8\pi} = \int_z^{z_0} dz' \frac{1 - Q_i}{H(1+z')^5} \int_{M_*}^{M_{\max}} dM E_M g_{\text{gl}} \frac{dn_M}{dM} \quad (3.2)$$

where  $\frac{dn_M}{dM}$  is the mass function of the DM halos hosting the sources. The parameter  $z_0$  is the redshift at which the first sources form, and  $g_{\text{gl}}$  is the rate at which sources switch on.

Figure (3) shows the comoving strength of the generated magnetic field in three different reionisation histories, all consistent with results of the [Planck Collaboration \(2016\)](#). Above  $z = 20$  there are no galaxies, and the magnetic field is nil. As galaxies form, their radiation induces magnetic fields that accumulate in the IGM. Once the Universe is fully ionised, the mechanism stops, and a plateau (in comoving units) is reached. Note that in physical units, the strength of the magnetic field by the end of reionisation is a few  $10^{-18}$  Gauss, a suitable seed value for any subsequent amplification by nonlinear processes.

#### 4. Discussion

The model we summarised here can be improved in several ways. In particular, we neglected the contribution of underdense regions, which could multiply the result obtained above by a factor of two. Similarly, we did not take into account the effect of the asphericity of the HII regions. Finally, we assumed that the HII regions have reached their steady state. Whether taking their growing regime into account would increase or decrease the global magnetic field is not obvious. However, nonlinearities develop in the cosmic velocity field as structure formation proceeds (e.g. [Ryu et al. 2008](#); [Greif et al. 2008](#); [Sur et al. 2012](#)). They enter into play when the seed magnetic field has reached its

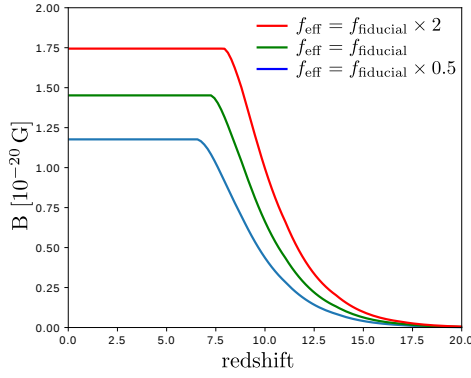

**Figure 3.** Evolution with redshift of the mean comoving magnetic field strength in the IGM in different reionisation histories. The green curve is the fiducial model assumed in Durrive *et al.* (2017) where  $f_{\text{eff}}$  is an effective reionisation efficiency. All three considered histories are in agreement with the Planck Collaboration (2016) constraints.

final strength (Langer *et al.* 2005). Magnetic field amplification thus sets in early on, at least within the nodes, filaments and sheets of the cosmic web. The strength shown in fig. 3 thus likely underestimates the actual magnetisation of those structures. In cosmic voids, plasma instabilities might have the potential to amplify rapidly the magnetic seed fields, and bring them above the lower limits suggested by the observation of blazars.

## References

- Beck, R. Future Observations of Cosmic Magnetic Fields with LOFAR, SKA and Its Precursors. In *Proceedings of Magnetic Fields in the Universe: From Laboratory and Stars to Primordial Structures*, AIP, 2015, pp. 3–17.
- Bourke, T.L., Braun, R., Fender, R., et al., eds. *Advancing Astrophysics with the Square Kilometre Array – Vol. I*, Dolman Scott Ltd for SKA Organisation, 2015. Available at <https://www.skatelescope.org/books/>.
- Durrer, R., Neronov, A. *A&AR* **2013**, *21*.
- Durrive, J.B., Langer, M. *MNRAS* **2015**, *453*, 345–356.
- Durrive, J.B., Tashiro, H., Langer, M., Sugiyama, N. *MNRAS* **2017**, *472*, 1649–1658.
- Greif, T.H., Johnson, J.L., Klessen, R.S., Bromm, V. *MNRAS* **2008**, *387*, 1021–1036.
- Gruzinov, A. *ApJ* **2001**, *563*, L15–L18.
- Harrison, E.R. *Phys. Rev. Lett.* **1973**, *30*, 188–190.
- Kulsrud, R.M., Zweibel, E.G. *Reports on Progress in Physics* **2008**, *71*, 046901.
- Langer, M., Aghanim, N., Puget, J.L. *A&A* **2005**, *443*, 367–372.
- Mishustin, I.N., Ruzmaikin, A.A. *Soviet Physics JETP* **1972**, *34*, 233–235.
- Planck Collaboration. *A&A* **2016**, *596*, A108.
- Press, W.H., Schechter, P. *ApJ* **1974**, *187*, 425.
- Pudritz, R.E., Silk, J. *ApJ* **1989**, *342*, 650–659.
- Ryu, D., Kang, H., Biermann, P.L. *A&A* **1998**, *335*, 19–25.
- Ryu, D., Kang, H., Cho, J., Das, S. *Science* **2008**, *320*, 909–12.
- Ryu, D., Schleicher, D.R.G., Treumann, R.A., et al. *Space Sci. Revs* **2012**, *166*, 1–35.
- Saga, S., Ichiki, K., Takahashi, K., Sugiyama, N. *Phys. Rev. D* **2015**, *91*, 123510.
- Schlickeiser, R. *Phys. Rev. Lett.* **2012**, *109*, 261101.
- Subramanian, K., Narasimha, D., Chitre, S.M. *MNRAS* **1994**, *271*, L15–L18.
- Subramanian, K. *Reports on Progress in Physics* **2016**, *79*, 076901.
- Sur, S., Federrath, C., Schleicher, D.R.G., et al. *MNRAS* **2012**, *423*, 3148–3162.
- Widrow, L.M., Ryu, D., Schleicher, D.R.G., et al. *Space Sci. Revs.* **2012**, *166*, 37–70.

# Small-scale dynamo as a mechanism for excitation of extragalactic magnetic fields

Dmitry Sokoloff

Moscow State University,  
Moscow, 119991, Russia and IZMIRAN, Troitsk, Moscow, 142190, Russia  
email: sokoloff.dd@gmail.com

**Abstract.** Presence of magnetic fields in cosmological voids is a challenge for dynamo theory. We argue that these fields can be considered as a result of small-scale dynamo action associated with random motions connected with formation of various structures Universe.

**Keywords.** magnetic fields, dynamo, Early Universe.

---

## 1. Introduction

Magnetic fields of spiral galaxies are believed to be excited by dynamo action based on differential rotation and mirror-asymmetric turbulence in the interstellar medium (e.g. Beck et al., 1996). Corresponding magnetic energy is closed to equipartition with kinetic energy of the turbulence. In this context, estimate for magnetic fields in cosmological voids suggested by Neronov & Semikoz (2009) looks as a challenge for dynamo theory. The point is that both conventional drivers of galactic dynamo, i.e. differential rotation and mirror-asymmetry of turbulence look irrelevant for media of voids.

In principle, origin of magnetic fields in the voids can be directly associated with particle processes in the Early Universe. The point is that differential rotation is a helpful however not obligatory participant in dynamo action and mirror asymmetry alone is in principle sufficient to enhance magnetic fields. Such dynamo is referred as  $\alpha^2$ -dynamo while conventional galactic dynamo is known in this context as  $\alpha\omega$ -dynamo. Indeed, violations of mirror symmetry (P-invariance) are known, say, for weak interactions and the media of the Early Universe near electro-weak phase transition. It results in magnetic field excitation at the epoch of electro-weak phase transition. Contemporary, bulk of knowledge concerning electro-weak phase transition gives enough free room to get magnetic field strength comparable with that suggested by Neronov & Semikoz (2009) for magnetic fields in voids (e.g. Vachaspati, 1991; Giovannini & Shaposhnikov, 2000; Semikoz & Sokoloff, 2004). In the framework of this scenario, magnetic fields in voids are immediate imprints of physical processes in the very Early Universe. This scenario presumes that physical process during the epoch of formation of structure of the Universe can be ignored for the magnetic field formation in the voids.

An alternative viewpoint concerning the origin of magnetic fields in voids departs from the idea that magnetic fields of galactic clusters are considered to be excited by a small-scale dynamo action (e.g. Ruzmaikin et al., 1989). In other words, this scenario suggests that magnetic field in the voids is excited by motions of electrically conducting media in the epoch of formation of the structure in the Universe and even at later states of its evolution. This scenario supposes that magnetic structures in the voids do not contain pronounced imprints of particle processes in the Early Universe. Magnetic fields which were created during the electro-weak phase transition or even earlier can contribute in

the seed for dynamo action, however another contribution associated with battery effects may produce the seed even alone.

Of course, these two scenarios are two extremes in the variety of opinions and various intermediate views can be found in the literature.

According to the sense of this focus meeting, we are now at the very early stage of investigation of extragalactic magnetic fields in voids and it looks important to isolate in an explicit form the above options and discuss which one looks more attractive. It is the aim of this contribution.

## 2. Particle processes and magnetic field in voids

First scenario looked very attractive at the initial stage of research, it obviously deserved investigation and it was addressed in various papers (e.g. Kahniashvili et al., 2011). One can summarize from the above cited papers that it is in principle possible to get sufficient magnetic energy from the particle processes to explain the supposed magnetic field in the voids (we note that Neronov & Semikoz, 2009 give lower magnetic field estimate only). For the first sight, it means that the scenario remains realistic at least until we learn more concerning magnetic field scale in the voids. The point is that Neronov & Semikoz (2009) do not give any estimate on the magnetic field scale.

In fact, however, the epoch of substantial mirror-asymmetry of the medium in the Universe is very short. In order to get substantial magnetic field amplification during this epoch we have to assume that magnetic field growth rate was very high. From the other hand the  $\alpha^2$ -dynamo equations provides a link between the scale of the growing magnetic field and its growth rate. Using this link, we can estimate the present-day scale of magnetic field which was excited in particle processes in the Early Universe and survives until present (see for technical details Tarbeeva et al., 2007). Of course, the estimate is to some extent model dependent, however the figure obtained as the estimate are very low indeed, of order of kilometres only. In spite of the fact that Neronov & Semikoz (2009) avoid to give lower estimate for the magnetic field scale in voids, it is very difficult to believe that magnetic field of this tiny scale could be important for astronomy.

We stress that the magnetic field generated due to mirror-asymmetry of particle process should be referred in the context of dynamo studies as a large-scale magnetic field. Its scale however is bounded from above by the horizon size of the Universe in the epoch of phase transitions which is small in the present-day scales. Because any kind of dynamo is much slower than the light propagation, the actual spatial scale of magnetic field driven by a dynamo acting in the epoch of phase transitions is even much smaller than the horizon size.

The above consideration do not include the case of a strictly homogeneous magnetic field created in an a-causal way just at the instant of Big Bang. Such a magnetic field could be sufficiently weak to avoid observable violations of isotropy of the Universe however sufficiently strong to satisfy lower bound of Neronov & Semikoz (2009), (e.g. Beck et al., 1996). This option was considered at first as early as 1965 by Zeldovich and is very difficult for observational verification (e.g. Ruzmaikin & Sokoloff, 1977). It is however difficult to consider the option at the most attractive one at least for the time being.

## 3. Small-scale dynamo in voids

Scenario with small-scale dynamo as magnetic field driver in the voids anticipates that magnetic field origin in the voids is more or less the same as that one in galactic

clusters. The difference is that kinetic energy in the voids is lower than that in clusters. Correspondingly, magnetic field strength in voids should be several order of magnitudes lower than that one in galactic clusters.

A weak point in this scenario is that we know almost nothing about possible turbulent flows in voids. From the other hand, it is very difficult to believe that formation of large-scale structure of the Universe was performed by purely laminar flows and did not resulted in any random flows. Fortunately, small-scale dynamo action does not require fully developed turbulent flows. In contrast, the simplest and useful model for small-scale dynamo suggested by Kasantsev (1967) deals with so-called short-correlated flows which contain just one spatial scale only.

Another important point is what does it mean "small scale" in the wording for the dynamo under discussion. The point is that the problem contains two scales, i.e. the scale of random vortexes  $l$  and the resistive scale  $\lambda$ . Both scales are referred as small ones in the dynamo studies because they are usually much smaller than the size of the whole magnetized body  $L$ . For the voids, the scale  $l$  is expected to be more or less comparable with the void scales while  $\lambda$  may be many orders of magnitude lower because dissipation in voids is expected to be very low. In principle,  $\lambda$  might be as tiny as scales discussed in the previous section. Fortunately, investigation of Kasantsev model (e.g. Novikov et al. 1983; Kleeorin et al., 2002) demonstrate that both scales determine the magnetic field correlation function however the magnetic energy at scales  $l$  remains substantial.

We note that the small-scale dynamo in the framework of the problem under discussion deserves further investigation. In particular, the random flow driving small-scale dynamo can be purely mirror-symmetric. Then the magnetic field generated is mirror-symmetric in average. However if the flow is still mirror-asymmetric the resulting magnetic field becomes mirror-asymmetric as well (e.g. Boldyrev et al., 2005; Malyshkin & Boldyrev, 2007; Yushkov & Lukin, 2017). Of course, magnetic helicity generated by small-scale dynamo in a mirror-asymmetric flow have to be taken into account in helicity balance for dynamo saturation (Sokoloff et al., 2017).

#### 4. Conclusion and discussion

Comparing the advantages and shortcomings of the above scenario we arrive to an impression that at least on the present stage of research the option that it is small-scale dynamo responsible for the excitation of magnetic fields in voids looks preferable. We note that the general impression from the talks presented at the focus meeting seems to support this opinion.

I am grateful to E.Yushkov and P.Frick for useful discussions. The research is supported by RFBR under grant 18-02-00085.

#### References

- Beck, R., Brandenburg, A., Moss, D., Shukurov, A., Sokoloff, D. 1996, *ARAA*, 34, 155  
Boldyrev, S., Cattaneo, F., & Rosner, R. 2005, *PRL*, 95, 255001  
Giovannini, M., & Shaposhnikov, M. 2000, *PRD*, 62, 103512  
Kahniashvili, T., Tevzadze, A.G. Ratra, B.P., & Zinner, E. 2011, *ApJ*, 726, 78  
Kazantsev, A.P. 1967 *JETP*, 53, 1806  
Kleeorin, N., Rogachevskii, I., & Sokoloff, D. 2002, *PRE*, 65, 036303  
Neronov, A., & Semikoz, D.V. 2009, *PRD*, 80, 123012  
Novikov, V.G., Ruzmaikin, A.A., & Sokoloff, D.D. 1983, *JETP*, 85, 909  
Malyshkin, L., & Boldyrev, S. 2007, *ApJ*Letters, 671, L185  
Ruzmaikin, A. A., & Sokoloff, D.D. 1977, *A&A*, 58, 247

Dmitry Sokoloff

- Ruzmaikin, A., Sokoloff, D., & Shukurov, A., 1989, *MNRAS*, 241, 1  
Semikoz, V.B., & Sokoloff, D.D. 2004, *PRL*, 92, 131301  
Sokoloff, D.D., Yushkov, E.V., & Lukin, A.S. 2017, *Geomagnetism and Aeronomy*, 57, 844  
Tarbeeva, S.M., Semikoz, V.B., & Sokoloff, D.D. 2007, *Astron. Rep.*, 51, 781  
Vachaspati, T. 1991, *Phys. L. B.*, 265, 258  
Yushkov, E.V., & Lukin, A.S. 2017, *GAFD* 111, 527  
Zeldovich Ya.B. 1965, *JETP*, 48, 986

# Large-Scale Diffuse Intergalactic Magnetic Fields Constraints with the Cherenkov Telescope Array

Paramita Barai<sup>1</sup>, Elisabete M. de Gouveia Dal Pino<sup>1</sup> (on behalf of the CTA Collaboration)

<sup>1</sup>Instituto de Astronomia, Geofísica e Ciências Atmosféricas - Universidade de São Paulo (IAG-USP), Rua do Matão 1226, São Paulo, 05508-090, Brazil  
email: paramita.barai@iag.usp.br

**Abstract.** Magnetic fields of the order of  $\mu$ -Gauss are observationally detected in galaxies and galaxy clusters, which can be (at least) in part originated by the amplification of much weaker primordial seed fields. These fields should be carried out by strong galactic outflows, magnetically enriching the InterGalactic Medium (IGM). However direct observation of magnetic fields in the IGM is scarce. This talk will give a review of how Intergalactic Magnetic Field (IGMF) can be constrained using gamma-ray observations. High-energy TeV photons emitted by distant blazars can interact with the cosmic extragalactic optical/infrared/microwave background light, producing electron-positron pairs, and initiating electromagnetic cascades in the IGM. The charged component of these cascades is deflected by IGMFs, thereby reducing the observed point-like TeV flux, and creating an extended image in the GeV energy range, which can potentially be detected with  $\gamma$ -ray telescopes (Fermi-LAT, HESS, CTA). Studies (e.g., Neronov & Vovk 2010, Dolag et al. 2011) have put lower limits on the IGMF strength of the order of  $10^{-16} - 10^{-15}G$ , and filling factors of 60%. This talk will describe the constraints which the Cherenkov Telescope Array sensitivity is expected to give (CTA Consortium 2018).

**Keywords.** magnetic fields, instrumentation: high angular resolution, methods: data analysis, (galaxies:) BL Lacertae objects: general, intergalactic medium, gamma rays: observations

---

## 1. Introduction

Magnetic Fields (MF) of the order of  $(1 - 10)\mu G$  are observed (e.g., Berkhuijsen et al. 2003) in galaxies and galaxy clusters. These fields are understood to be created from the amplification of much weaker primordial seed fields, by turbulent dynamo effects and baryonic processes. The origin of these tiny seed fields is unknown (e.g., Widrow 2002). There are 2 classes of concordance models for the generation of primordial seed fields. One is *Cosmological origin*: where the seed fields are produced in the early primordial Universe (e.g., Grasso & Rubinstein 2001). The other is *Astrophysical origin*: where the seed fields are produced by plasma motions from baryonic processes (star-formation, supernovae, black holes) in galaxies (e.g., Ryu et al. 2012).

A potentially relevant component of cosmic MF, of which very little is known yet, is the Intergalactic Magnetic Field (IGMF) existing in the low-density InterGalactic Medium (IGM), or the space between galaxies not related to gravitational collapse. The MFs inside galaxies are dragged out by powerful galactic outflows generated by energy feedback from baryonic processes with time, and dispersed into the IGM. Over cosmological epochs these IGMFs permeate the turbulent IGM, and may be even amplified by turbulent dynamo action (e.g., de Gouveia Dal Pino 2011), at the same time influencing large scale structure formation (e.g., Dolag 2006, Barai 2008).

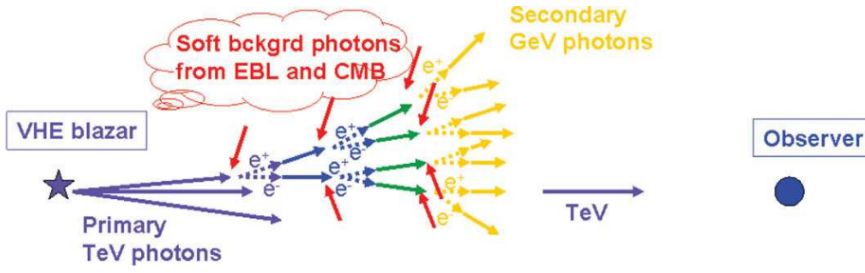

**Figure 1.** Propagation of VHE primary TeV photons  $\gamma_{\text{VHE},1}$  to Earth, and the interactions happening on the way to produce secondary GeV  $\gamma_{\text{VHE},2}$  photons. Figure from Sol et al. (2013a).

The knowledge of IGMF distribution is crucial in understanding the *cosmological* versus *astrophysical* origin of cosmic MF. It is challenging to directly observe the IGMF, because they are diffuse and weak in intensity. An upper limit:  $B_{IGM} < (10^{-8} - 10^{-9})G$ , is provided by standard constraints: Big Bang nucleosynthesis, Cosmic Microwave Background (CMB) anisotropy (e.g., Durrer et al. 1998), Faraday rotation measures of polarized radio emission from quasars (e.g., Pshirkov et al. 2016). Here we will overview how IGMF can be constrained using  $\gamma$ -ray observations, which provide lower limits for it.

## 2. IGMF Constraints using $\gamma$ -ray Observations of Blazars

A novel technique to constrain the IGMF's strength and filling factor uses Very-High-Energy (VHE)  $\gamma$ -ray emission from distant blazar sources. Blazars are Active Galactic Nuclei (AGN) with the central supermassive black hole jet pointed toward our line of sight, and present rapid variability (e.g., Aharonian et al. 2007). The observed spectral energy distributions of blazars (e.g., Bonnoli et al. 2015) are fitted to models, where the TeV  $\gamma$ -ray emission comes from the jet base. There, relativistic electrons ( $e^-$ ) upscatter, by Inverse Compton (IC), lower-energy ambient photons to the TeV. Relativistic protons can also have a contribution, by emitting direct synchrotron radiation, or by the creation of secondary pions, which decay into TeV photons.

The VHE primary TeV photons ( $\gamma_{\text{VHE},1}$ ) emitted by distant blazars undergo the following interactions, as they travel 100s-of-Mpc intergalactic space before reaching Earth:

$$\gamma_{\text{VHE},1} + \gamma_{\text{EBL}} \longrightarrow e_1^- e_1^+, \quad e_1^- + \gamma_{\text{CMB}} \longrightarrow \gamma_{\text{VHE},2} + e_2^- . \quad (2.1)$$

Firstly, the  $\gamma_{\text{VHE},1}$  interact with optical/infrared/microwave Extragalactic Background Light (EBL), and cause  $e^- e^+$  pair production. These very-energetic electrons undergo IC scattering off CMB photons and produce secondary  $\gamma$ -rays ( $\gamma_{\text{VHE},2}$ ) in the GeV energy range, as shown in Fig. 1 (Sol et al. 2013a). The  $e^- e^+$  pair electromagnetic cascades are deflected by IGMF present in the intervening space, and the secondary GeV  $\gamma_{\text{VHE},2}$  are strongly attenuated as they appear on Earth. These attenuated secondary GeV components can be detected with our  $\gamma$ -ray telescopes (Fermi-LAT, HESS, CTA), as either:

- **Pair Halo:** Spatially-extended GeV emission around primary TeV  $\gamma_{\text{VHE},1}$  signal. These are expected for  $B_{IGM} > \sim 10^{-16}G$ , and involve imaging analysis searches for extended pair halos around blazars. (Larger IGMFs produce larger deflections, resulting in a weaker pair halo flux, that can make it undetectable with current instruments.)

- **Pair Echo:** GeV emission with a time delay relative to the primary. These are expected for  $B_{IGM} < 10^{-16}G$ , and involve time-resolved spectral analysis of pair echoes.

Studies usually model the  $e^- e^+$  pair cascade development using Monte-Carlo simula-



tions, compute the simulated **pair halo** and/or **pair echo** assuming some IGMF configuration, compare with observations (e.g. Fermi data on blazars), and derive IGMF constraints (e.g., Alves Batista 2017). However, several studies have inferred a non-detection of secondary components, which nevertheless provide lower limits on  $B_{IGM}$ , assuming that the suppression of GeV flux is due to the deflection of  $e^-e^+$  pairs by IGMF. E.g. Neronov & Vovk (2010) found a lower limit of  $B_{IGM} \geq 3 \times 10^{-16}G$ . Dolag et al. (2011) inferred that IGMF fills at least 60% of space with fields stronger than  $B_{IGM} \geq 10^{-16} - 10^{-15}G$ . Considering a coherence length  $> 1$  Mpc for the IGMF and persistent TeV emission, Taylor et al. (2011) inferred a  $B_{IGM} > (10^{-17} - 10^{-15})G$ .

A first hint for the existence of pair halos (extended emission around a point-source) has been found by Chen et al. (2015), by the stacking analysis of 24 blazars at  $z < 0.5$  using Fermi-LAT data. It implies a magnetic field strength of  $B_{IGM} \sim 10^{-17} - 10^{-15}G$ , using a Bayesian statistics.

### 3. $\gamma$ -ray Pair Halo to be Observed by the Cherenkov Telescope Array

The Cherenkov Telescope Array (CTA) is a planned next-generation ground-based  $\gamma$ -ray observatory (CTA Consortium 2018). CTA will provide the deepest insight into the non-thermal VHE Universe ever reached, probing the physical conditions of cosmic accelerators like black holes and supernovae. It will consist of an array of around 100 imaging atmospheric Cherenkov telescopes of various sizes. CTA foresees a factor of 5 – 10 improvement in sensitivity in the energy domain ( $\sim 100$  GeV – 10 TeV) of current Cherenkov telescopes: HESS, MAGIC, and VERITAS. It is also expected to extend the observable VHE range to below 100 GeV and above 100 TeV, and have unprecedented angular and energy resolution, as well as a wider field-of-view. A Northern site (Canarias Islands) and a Southern site (Chile) are planned for a full sky coverage.

Elyiv et al. (2009) performed Monte Carlo simulations of 3D electromagnetic cascades (described in §2). One of the cases they simulated is a blazar source at a distance 120 Mpc, and  $B_{IGM} = 10^{-14}G$ . The expected geometry of *Pair Halo* from this blazar is presented in Fig. 2 - left panel. The sky Field-of-View (FoV) of  $1.5^\circ$  is indicated by the blue-dashed circle, which is equal to the radius of the FoV of the MAGIC telescope. And a  $2.5^\circ$  FoV is denoted by the red-solid circle, which corresponds to the size of the FoV of the HESS telescope. These would perfectly fit into the much larger FoV of CTA.

Sol et al. (2013b) estimated the pair halo flux using a theoretical model of differential angular distribution of a pair halo at  $z = 0.129$  with  $E_\gamma > 100$  GeV (Eungwanichayapant & Aharonian 2009), and assuming an observation time of 50 hours. The pair halo emission is displayed in Fig. 2 - right panel, as the dashed curve. The CTA sensitivity curves are overplotted as the solid lines: the CTA South (North) site is labeled as I (NB). Hence CTA should well observe pair halos in the energy range (0.1 – 5) TeV.

### 4. Conclusions

The observational detection of IGMF (extremely tiny magnetic fields permeating the cosmos on the largest scales) can shed light on the origin of seed fields in the Universe. Current results of VHE  $\gamma$ -ray astronomy conclude to the existence of a non-zero IGMF:  $10^{-17}G < B_{IGM} < 10^{-14}G$ , mostly based on the non-detection of expected secondary GeV  $\gamma$ -rays. Future theoretical studies need to take into account possible additional effects in the IGM, e.g. energy losses by cosmic rays, plasma effects. Observationally the positive detection of *Pair Halos* and *Pair Echos* are needed with detailed data on cascade signatures, which the CTA with its improved sensitivity is expected to observe.

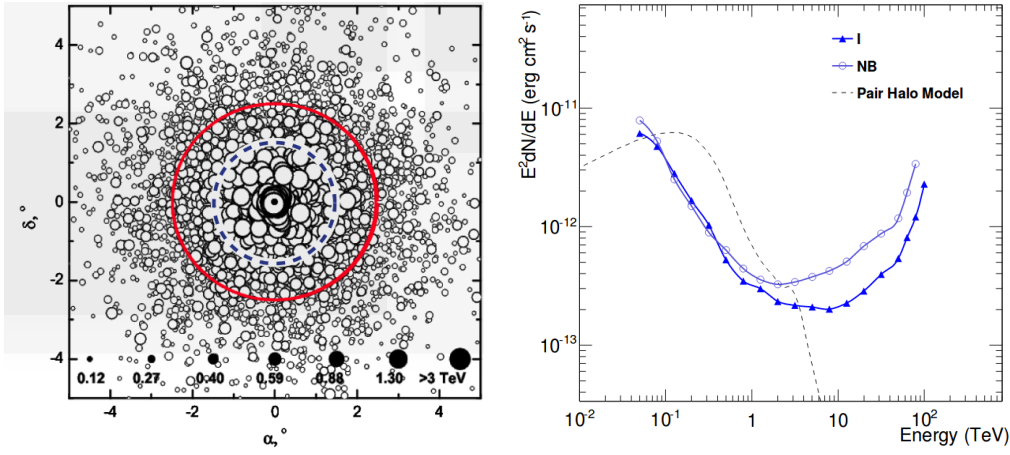

**Figure 2.** *Left panel:* Open black circles indicate the arrival directions of primary and secondary  $\gamma$ -rays from a blazar (details in §3), with the circle sizes proportional to the photon energies (as labeled in TeV at the bottom of the figure). Sky FoVs of 1.5° and 2.5° are shown by the blue-dashed and red-solid circles. Figure from Elyiv et al. (2009). *Right panel:* Estimated flux for the expected pair halo emission compared to the CTA sensitivity curves for the southern (I) and northern (NB) sites. Figure from CTA Consortium (2018), originally from Sol et al. (2013b).

## 5. Acknowledgements

This work is partially supported by the FAPESP grants #2016/01355-5 and #2013/10559-5, and by a CNPq grant (#306598/2009-4).

## References

- Aharonian, F. et al. 2007, *ApJ*, 664, L71  
 Alves Batista, R. 2017, *Il Nuovo Cimento C*, 40, 132  
 Barai, P. 2008, *ApJ*, 682, L17  
 Berkhuijsen, E. M., Beck, R. & Hoernes, P. 2003, *A&A*, 398, 937  
 Bonnoli, G., Tavecchio, F., Ghisellini, G. & Sbarato, T. 2015, *MNRAS*, 451, 611  
 Chen, W., Buckley, J. H. & Ferrer, F. 2015, *Physical Review Letters*, 115, 211103  
 Cherenkov Telescope Array Consortium: Acharya, B. S. et al. 2018, eprint arXiv:1709.07997  
 de Gouveia Dal Pino, E. M. 2011, in *The Sun, the Stars, the Universe and General Relativity: Proceedings of Sobral 2009*; eds. S.E. Perez Bergliaffa, M. Novello and R. Ruffini, CSP, 37  
 Dolag, K. 2006, *Astronomische Nachrichten*, 327, 575  
 Dolag, K., Kachelriess, M., Ostapchenko, S. & Tomas, R. 2011, *ApJ*, 727, L4  
 Durrer, R., Kahniashvili, T. & Yates, A. 1998, *Physical Review D*, 58, 123004  
 Elyiv, A., Neronov, A. & Semikoz, D. V. 2009, *Physical Review D*, 80, 023010  
 Eungwanichayapant, A. & Aharonian, F. 2009, *Int. Journal of Modern Physics D*, 18, 911  
 Grasso, D. & Rubinstein, H. R. 2001, *Physics Reports*, 348, 163  
 Neronov, A. & Vovk, I. 2010, *Science*, 328, 73  
 Pshirkov, M. S., Tinyakov, P. G. & Urban, F. R. 2016, *Physical Review Letters*, 116, 191302  
 Ryu, D., Schleicher, D. R. G., Treumann, R. A., Tsagas, C. G. & Widrow, L. M. 2012, *Space Science Reviews*, 166, 1  
 Sol, H. et al. 2013a, *IAUS (Solar and Astrophysical Dynamos and Magnetic Activity)*, 294, 459  
 Sol, H. et al. 2013b, *Astroparticle Physics*, 43, 215  
 Taylor, A. M., Vovk, I. & Neronov, A. 2011, *A&A*, 529, A144  
 Widrow, L. M. 2002, *Reviews of Modern Physics*, 74, 775

# Cosmic-ray propagation in the turbulent intergalactic medium

Rafael Alves Batista<sup>1,\*</sup>, Elisabete M. de Gouveia Dal Pino<sup>1,†</sup>, Klaus Dolag<sup>2,3</sup>, Saqib Hussain<sup>1</sup>

<sup>1</sup>Universidade de São Paulo - Instituto de Astronomia, Geofísica e Ciências Atmosféricas; Rua do Matão, 1226, 05508-090, São Paulo-SP, Brazil

<sup>2</sup>Max Planck Institute for Astrophysics, Karl-Schwarzschild-Str 1, 85741 Garching, Germany

<sup>3</sup>Universitäts-Sternwarte München, Scheinerstraße 1, 81679, München, Germany

\* email: rafael.ab@usp.br

† email: dalpino@iag.usp.br

## Abstract.

Cosmic rays (CRs) may be used to infer properties of intervening cosmic magnetic fields. Conversely, understanding the effects of magnetic fields on the propagation of high-energy CRs is crucial to elucidate their origin. In the present work we investigate the role of intracluster magnetic fields on the propagation of CRs with energies between  $10^{16}$  and  $10^{18.5}$  eV. We look for possible signatures of a transition in the CR propagation regime, from diffusive to ballistic. Finally, we discuss the consequences of the confinement of high-energy CRs in clusters and superclusters for the production of gamma rays and neutrinos.

**Keywords.** magnetic fields, large-scale structure of universe, MHD, galaxies: clusters: general

---

## 1. Introduction

Cosmic magnetic fields are ubiquitous in the universe and their intensities span from  $10^{-10}$  G in extended filaments, which are possibly the largest magnetised structures in the universe, up to around  $10^{15}$  G in magnetars. Tiny magnetic fields ( $\sim 10^{-17}$  G) can also exist in the vast regions devoid of matter, the so-called cosmic voids (see Barai & de Gouveia Dal Pino 2018, and references therein). Presently little is known about the origin and evolution of these diffuse intergalactic magnetic fields (IGMFs).

CRs are produced via shock and turbulent acceleration processes in active galaxies and even in the more diffuse regions of the intergalactic medium (IGM) like relics and haloes (e.g. Brüggen & Vazza 2015). They are deflected by the pervasive magnetic fields and thus can be used to constrain their strength and coherence lengths.

Strong evidence exists supporting an extragalactic origin of CRs with energies  $E \gtrsim 8 \times 10^{18}$  eV (Pierre Auger Collaboration 2017), but it is not clear yet at which energies there is a transition between galactic and extragalactic CRs. Moreover, there are indications of a possible third component comprised of nearby extragalactic sources potentially responsible for the CR spectrum at energies between the second knee ( $E \sim 10^{17}$  eV) and the ankle ( $E \sim 10^{18.5}$  eV) (Deligny 2014). At energies below  $E \sim Z \times 10^{17}$  eV, wherein  $Z$  is the atomic number of the cosmic-ray nucleus, it is widely believed that Galactic sources dominate the spectrum as their Larmor radii are about the size of our Galaxy.

A number of authors have performed magnetohydrodynamical (MHD) simulations of large-scale structure formation which were subsequently used for the propagation of CRs, particularly the highest-energy ones (UHECRs). For instance, Dolag *et al.* (2004)

and Sigl *et al.* (2003) have reached diverging conclusions regarding the effects of extragalactic magnetic fields on UHECR propagation. The former concluded that deflections should be small in most of the sky (see also Medina Tanco *et al.* 1998), whereas the latter concluded that they are large, thereby disfavoured the identification of individual sources of UHECRs. In more recent work, Hackstein *et al.* (2016) obtained results that favour small deflections, which is consistent with their later work using constrained MHD simulations (Hackstein *et al.* 2017). A more pessimistic scenario has been studied by Alves Batista *et al.* (2017), who concluded that even if the magnetic fields in cosmic voids, which fill most of the volume of the universe, are high, the deflection of UHE protons with  $E \gtrsim 5 \times 10^{19}$  eV would be  $\lesssim 15^\circ$  in about 10-50% of the sky, depending on the magnetic power spectrum. This would enable the identification of UHECR sources even in the most pessimistic scenarios.

The distribution of extragalactic magnetic fields is largely uncertain and many differences exist across models. A comprehensive review on the topic was presented by Vazza *et al.* (2017), and a detailed discussion of these uncertainties on UHECR propagation was given by Alves Batista *et al.* (2017). Other properties of the magnetised IGM may also affect the propagation of CRs. This includes magnetic helicity, related to the topology of the magnetic field lines, which can leave an imprint in the large-scale distribution of CR arrival directions for some specific source distributions (Alves Batista & Saveliev 2018), as well as plasma instabilities (Brunetti & Jones 2015).

It is not clear at which energy the transition between the ballistic and diffusive regimes of CR propagation occur. Also, there is an energy below which the flux of extragalactic CRs is strongly suppressed due to magnetic horizon effects, but this depends on the strength and coherence length of the magnetic fields, as well as the distribution of sources. Alves Batista & Sigl (2014) have shown that for sources distributed approximately uniformly, this energy is  $E \lesssim 10^{18}$  eV for common extragalactic magnetic field models obtained via MHD simulations. Note, however, that this result depends on the distribution of magnetic fields between the closest sources and Earth, so that magnetic horizon effects may play a role for highly inhomogeneous distributions of sources.

## 2. Setup of the simulations

Using 3D cosmological MHD simulations done by Dolag *et al.* (2004), obtained with GADGET (Springel 2005), we investigate the propagation of CRs with energies  $10^{16} \lesssim E/\text{eV} \lesssim 10^{18.5}$ , whose origins are unknown and about which few studies have been done.

We perform a numerical study of the propagation of CRs in the aforementioned MHD background. We employ the CRPropa code (Alves Batista *et al.* 2016). We consider adiabatic energy losses due to the expansion of the universe. Photohadronic and photonuclear interactions between high-energy CRs and photons from the CMB, EBL, and from the clusters are neglected in this first study. Interactions between CMB/EBL photons with CRs are virtually negligible at these energies.

The cosmological simulations we use here have been previously used by Dolag *et al.* (2004) for UHECR propagation studies. They correspond to a volume of  $\sim (140 \text{ Mpc})^3$ . The initial conditions of the simulation are such that the relative positions between the main structures and Earth are roughly preserved. We select a sample of clusters from the simulation for the analysis, and choose the Virgo cluster to discuss the results.

### 3. Results

In Fig. 1 the trajectories of three cosmic-ray protons are shown for  $E = 10^{17}$  eV and  $E = 10^{18}$  eV. One can see in Fig. 1 that the propagation is approximately diffusive near the source, where the intensity of the fields is higher, transitioning towards a rectilinear propagation as energy increases.

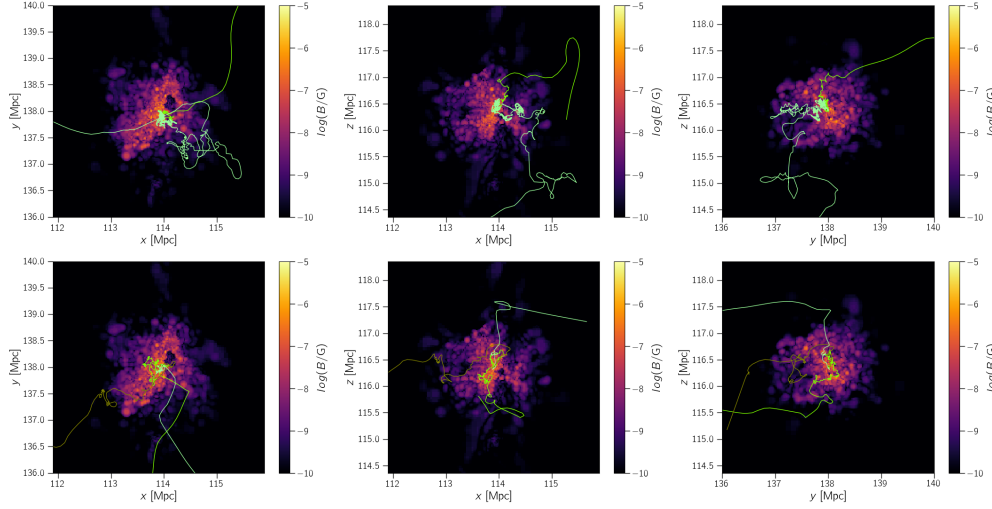

**Figure 1.** Slices  $xy$  (left),  $xz$  (middle) e  $yz$  (right column) of the simulated volume. The colour scale corresponds to the intensity of the field in these regions. Trajectories of three CR protons are represented through the green lines with different shades. The scenario in the upper row corresponds to  $E = 10^{17}$  eV, whereas the lower row is for  $E = 10^{18}$  eV.

The diffusion coefficient is energy-dependent and combines two regimes, quasi-linear ( $D \propto E^{1/3}$ ), and non-resonant ( $D \propto E^2$ ). The diffusion coefficient can be written as  $D = \langle r^2 \rangle / 6t$ , wherein  $r$  is the displacement of the CR with respect to its initial position, and  $t$  is the time it takes to move a distance  $r$ . CRs can escape the cluster if  $t$  is less than the age of the cluster, assumed here to be of the order of a Hubble time; and  $r \simeq 1$  Mpc, the typical size of a cluster. This implies that for  $D \lesssim 10^{27} \text{ m}^2 \text{ s}^{-1}$  the diffusion time is comparable to one Hubble time. The behaviour of the diffusion coefficients for different combinations of energy and distance to the centre of the cluster is shown in Fig. 2.

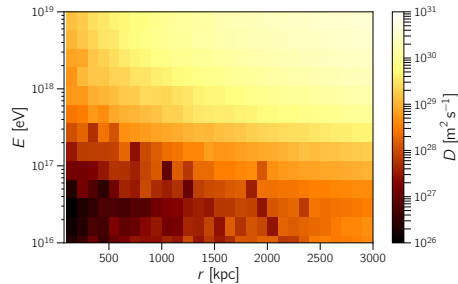

**Figure 2.** Diffusion coefficient as a function of the cosmic-ray energy and distance to the centre of the cluster for the case of protons with an  $E^{-1}$  spectrum leaving the Virgo cluster.

Note that in the central regions of the cluster ( $r \lesssim 500$  kpc) the CRs tend to be confined longer compared to those in the cluster outskirts. The energy at which CRs

cease to be magnetically confined is  $E \sim 10^{17}$  eV. While this result is somewhat trivial, in the sense that it follows from considerations of the strength of magnetic fields and the size of clusters, it enables us to reach important conclusions. First, all CRs with energies  $E \lesssim 10^{17}$  eV should originate within our local supercluster. Second, if our supercluster contains sources of high-energy CRs, the low-energy suppression of the extragalactic CR spectrum should not occur at energies much larger than  $\sim 10^{17}$  eV.

#### 4. Conclusions & Outlook

In the present work we have presented preliminary results of a first investigation of the effects of intracluster magnetic fields on CR propagation, using cosmological MHD simulations. We have estimated the diffusion coefficients of CRs in clusters. One of our main results is that below  $E \sim 10^{17}$  eV CRs cannot escape the innermost regions of clusters. As a consequence, CRs with  $E \lesssim 10^{17}$  eV originate either within the Milky Way or in our local cluster. We have also concluded that at these energies CRs are confined for a time comparable to the age of the cluster.

Thermal UV and X-ray photons produced in the hot ICM may serve as target fields for CR interactions depending on their density; in the central regions of clusters, in particular, this effect may be considerable. Employing the numerical tools here described, we are currently performing a detailed analysis of high-energy CR propagation in galaxy clusters taking into account the photohadronic, photonuclear, and hadronuclear interactions between the CRs and the intracluster gas/photons, which may produce a substantial number of secondary high-energy particles including gamma rays and neutrinos.

#### Acknowledgements

This work is supported by the São Paulo Research Foundation (FAPESP) grants #2017/12828-4 and #2013/10559-5, and by CNPq grants (#306598/2009-4).

#### References

- R. Alves Batista and G. Sigl 2014, *JCAP*, 11, 031
- R. Alves Batista *et al.* 2016, *JCAP*, 05, 038
- R. Alves Batista *et al.* 2017, *Phys. Rev. D*, 96, 023010
- R. Alves Batista and A. Saveliev 2018, *Submitted to JCAP*, arXiv:1808.04182
- P. Barai & E. M. de Gouveia Dal Pino 2018, *These Proceedings*
- M. Brüggén & F. Vazza 2015, in: A. Lazarian, E. M. de Gouveia Dal Pino, C. Melioli (eds.), *Magnetic Fields in Diffuse Media* (Berlin: Springer-Verlag), p. 599
- G. Brunetti, & T. W. Jones 2015, in: A. Lazarian, E. M. de Gouveia Dal Pino, C. Melioli (eds.), *Magnetic Fields in Diffuse Media* (Berlin: Springer-Verlag), p. 557
- O. Deligny 2014, *Comptes Rendus Physique*, 15, 367
- K. Dolag *et al.* 2004, *JCAP*, 01, 009
- S. Hackstein *et al.* 2016, *MNRAS*, 462, 3660
- S. Hackstein *et al.* 2017, *MNRAS*, 475, 2519
- R. Jansson and G. Farrar 2012a, *ApJ*, 757, 14
- R. Jansson and G. Farrar 2012b, *ApJ*, 761, L11
- G. A. Medina Tanco, E. M. de Gouveia Dal Pino, & J. E. Horvath 1998, *ApJ*, 492, 200
- G. Müller 2016, *JCAP*, 08, 025
- Pierre Auger Collaboration 2017, *Science*, 357, 1266
- G. Sigl, F. Miniati, T. Ensslin 2003, *Phys. Rev. D* 68, 043002
- V. Springel 2005, *MNRAS*, 364, 1105
- F. Vazza *et al.* 2017, *Class. Quant. Grav.*, 34, 234001

# On energy equipartition between cosmic rays and magnetic fields

Amit Seta, Anvar Shukurov, Paul J. Bushby & Toby S. Wood

School of Mathematics, Statistics & Physics, Newcastle University, UK  
email: a.seta1@ncl.ac.uk

**Abstract.** Interpretations of synchrotron observations often assume a tight correlation between magnetic and cosmic ray energy densities. We examine this assumption using both test-particle simulations of cosmic rays and MHD simulations which include cosmic rays as a diffusive fluid. We find no spatial correlation between the cosmic rays and magnetic field energy densities at turbulent scales. Moreover, the cosmic ray number density and magnetic field energy density are statistically independent. Nevertheless, the cosmic ray spatial distribution is highly inhomogeneous, especially at low energies because the particles are trapped between random magnetic mirrors. These results can significantly change the interpretation of synchrotron observations and thus our understanding of the strength and structure of magnetic fields in the Milky Way and nearby spiral galaxies.

**Keywords.** Cosmic rays, Magnetic fields, Diffusion, Radio continuum: ISM

---

## 1. Introduction

Synchrotron emission is one of the main observational probes of galactic magnetic fields. The synchrotron intensity  $I$  depends on the number density of cosmic ray electrons  $n_{\text{cr}}^{(e)}$  and magnetic field  $b_{\perp}$  perpendicular to the line of sight  $\ell$ ,

$$I = K \int_L n_{\text{cr}}^{(e)} b_{\perp}^{(p+1)/2} d\ell, \quad (1.1)$$

where  $K$  is a constant,  $L$  is the total path length and  $p$  is the power-law index of the electron energy spectrum ( $p \approx 3$  in spiral galaxies). The determination of magnetic field strength from the synchrotron intensity requires an independent observation of the number density of cosmic ray electrons. In the absence of such information, an energy equipartition between the total cosmic ray (consisting of 90% protons, 1–2% electrons and the rest are heavier particles) and magnetic field energy densities is assumed in order to extract the magnetic field strength. Though there is no convincing theoretical justification or observational evidence to assume point-to-point energy equipartition between cosmic rays and magnetic fields in spiral galaxies, it is widely used to obtain magnetic field strengths from synchrotron intensities (Beck & Krause 2005).

## 2. Energy equipartition argument: previous tests and our approach

The energy equipartition assumption was first used to study the energy content in cosmic rays and magnetic fields in the jet of M87 using optical and radio emissions from the system (Burbidge 1956). Since then, the energy equipartition assumption has been used to obtain the magnetic field strength in various systems. Duric (1990) suggested that the range of possible magnetic field strengths in spiral galaxies can differ by at most an order of magnitude from the equipartition value. The conclusion is justified as

follows. If the magnetic fields are considerably weaker than the equipartition value then the particles would quickly escape the disk and almost no synchrotron emission would be observed. On the other hand, if the fields are far stronger, then the particles would be confined very close to the sources and strong emission would be observed but only in small regions around the sources. Neither of the above situations is actually seen in spiral galaxies. Also, a weakness of this type of argument is that cosmic ray diffusivity depends not on the magnetic field strength but on the *ratio* of the random to large-scale magnetic field strengths. Chi & Wolfendale (1993) used gamma-ray observations to obtain the proton number density in the Large and Small Magellanic Clouds (LMC and SMC). They showed that energy equipartition does not hold for these irregular galaxies. However, Mao et al. (2012), also using gamma-ray data, concluded that the equipartition seems to hold in the LMC. The radio-FIR correlation studies suggest that the energy equipartition assumption is invalid on scales smaller than a few kpc and may hold on larger scales (Basu & Roy 2013). Yoast-Hull et al. (2016) analyzed the gamma-ray and radio spectra of starburst galaxies and concluded that equipartition does not hold in these dynamic systems. The energy equipartition assumption, when applied on large scales, seems to hold for a number of systems (Beck 2016). However, there are also cases where this is not true. Here, using test-particle and magnetohydrodynamic (MHD) simulations, we test the point-wise or local energy equipartition assumption.

### 3. Cosmic rays as test particles

Cosmic ray particles gyrate around the magnetic fields lines and are scattered by small-scale magnetic fluctuations, which leads to their diffusion in galaxies (Cesarsky 1980). Such fluctuations can be spatially Gaussian or intermittent. We generate an intermittent magnetic field by numerically solving the induction equation using a chaotic velocity field with the Kolmogorov energy spectrum. The induction equation is solved using a finite difference numerical scheme in a periodic box of dimensionless size  $2\pi$  (physically equivalent to the driving scale of the turbulence  $l_0 \simeq 100$  pc for spiral galaxies) with  $512^3$  points. Exponentially growing magnetic fields are generated by such a flow via the fluctuation dynamo action. The left-hand panel of Fig. 1 shows that the resulting magnetic field is spatially intermittent being concentrated into filamentary structures. A Gaussian random magnetic field with identical power spectrum is obtained from the intermittent one by phase randomization (Shukurov et al. 2017). For an ensemble of particles in each of these fields, we then solve the particle equation of motion,

$$\frac{d^2\mathbf{r}}{dt^2} = \frac{v_0}{r_L} \frac{d\mathbf{r}}{dt} \times \frac{\mathbf{b}}{b_{\text{rms}}}, \quad (3.1)$$

where  $\mathbf{r}$  is the particle's position at time  $t$ ,  $v_0$  is the particle's speed,  $r_L$  is the particle's Larmor radius (a parameter to control particle energy) and  $\mathbf{b}$  is the magnetic field assumed to be static at the time scales of interest. Initially, the particles are distributed uniformly in space with randomly directed velocities but fixed speed  $v_0$ . Once the diffusion sets in, we calculate the coordinates of each particle modulo  $2\pi$ , divide the numerical domain into  $512^3$  cubes and count the number of cosmic ray particles in each cube to obtain the cosmic ray number density as a function of time and position. Then we average over a long time to obtain the time-independent cosmic ray distribution  $n_{\text{cr}}$ . Since we neglect any energy losses,  $n_{\text{cr}}$  represents a cosmic ray proton distribution.

The middle panel of Fig. 1 shows  $n_{\text{cr}}$  in an intermittent magnetic field. For both the Gaussian and intermittent fields, the magnetic field and cosmic rays are not correlated and the correlation remains close to zero even when both distributions are averaged over



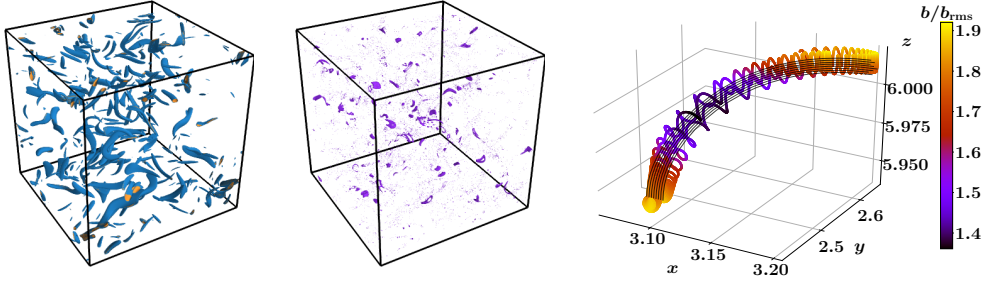

**Figure 1.** Left: The normalised strength of the intermittent magnetic field  $b^2/\langle b^2 \rangle = 12$  (blue), 15 (yellow) from a fluctuation dynamo simulation ( $\langle \dots \rangle$  denotes a volume average). Middle: The normalised cosmic ray number density  $n_{\text{cr}}/\langle n_{\text{cr}} \rangle = 3.5$  for low-energy particles ( $r_L/l_0 = 0.0016$ ). The magnetic field and cosmic ray number density are uncorrelated and yet there are small-scale structures in the cosmic ray distribution. This is due to magnetic traps which depends on the topology of magnetic field lines rather than the field strength. Right: The trajectory of a trapped particle in the simulation, with the magnetic field strength along the trajectory shown with colour. The dark grey lines show magnetic field lines. The particle moves forward and backward between two magnetic mirrors.

any scale less than the box size. The probability density of  $n_{\text{cr}}$  in both intermittent and Gaussian magnetic fields is Gaussian at higher energies (particles with  $r_L > l_0$ ) but develops a long, heavy tail at lower energies. The spatial distribution of low-energy cosmic rays ( $r_L \lesssim l_0$ ) is intermittent with numerous small-scale cosmic ray structures (middle panel of Fig. 1). These structures are due to randomly distributed magnetic mirror traps. This is confirmed by the right-hand panel of Fig. 1 which shows a particle trajectory close to one such cosmic ray structures in the domain. The particle follows magnetic field lines (shown in dark grey) but is trapped between two magnetic mirrors. The number of such cosmic rays structures increases when a uniform magnetic field is included and decreases when pitch-angle scattering due to the unresolved magnetic fluctuations is added (Sect. 3.2 in Seta et al. 2018). However, for all cases the cosmic rays and magnetic fields are not correlated at scales smaller than the box size. Furthermore, the magnetic field energy density ( $b^2$ ) and cosmic ray ( $n_{\text{cr}}$ ) distributions are statistically independent of each other (Appendix C in Seta et al. 2018). Assuming that this also applies to cosmic-ray electrons, this implies that Eq. (1.1) can be written as

$$I = K \int_L n_{\text{cr}}^{(e)} b_{\perp}^2 d\ell = \frac{K}{L} \int_L n_{\text{cr}}^{(e)} d\ell \int_L b_{\perp}^2 d\ell = KL \langle n_{\text{cr}}^{(e)} \rangle \langle b_{\perp}^2 \rangle. \quad (3.2)$$

Thus, one can use synchrotron intensity and the mean cosmic ray number density to obtain the average magnetic field strength.

#### 4. Cosmic rays as a fluid

Cosmic rays exert pressure on the thermal gas which affects the magnetic field, which in turn controls the cosmic ray propagation. To include this nonlinear effect, we solve the MHD equations together with an advection-diffusion equation for the cosmic ray fluid (see Snodin et al. 2006 for equations, parameters and boundary conditions). A random flow is driven at the box scale by an explicit force in the Navier–Stokes equation. Cosmic rays are injected continuously at each time step but can be lost through the domain boundary. The magnetic field is first amplified exponentially, but then saturates due to the back-reaction of the Lorentz force on the flow. The mean cosmic ray energy also

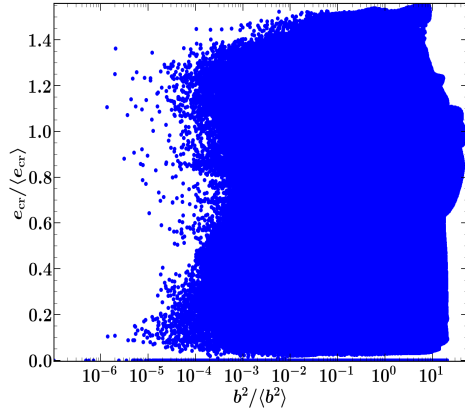

**Figure 2.** The scatter plot for the normalized energy densities of cosmic rays  $e_{cr}/\langle e_{cr} \rangle$  and magnetic fields  $b^2/\langle b^2 \rangle$  for the case with  $\langle e_{cr} \rangle \approx \langle b^2 \rangle$  at the box scale. Even though both energy densities are equal when averaged over the size of the domain, locally they are not correlated.

increases initially but then settles down to a steady value. We vary the injection rate of cosmic rays such that, in the saturated stage, there are three cases for the relation between the average cosmic ray  $e_{cr}$  and magnetic field energy densities  $b^2$ :  $\langle e_{cr} \rangle < \langle b^2 \rangle$ ,  $\langle e_{cr} \rangle \approx \langle b^2 \rangle$  and  $\langle e_{cr} \rangle > \langle b^2 \rangle$ . In all three cases, the cosmic ray energy density is not correlated with the magnetic field energy density. Fig. 2 confirms that the two quantities are uncorrelated even when  $\langle e_{cr} \rangle \approx \langle b^2 \rangle$ .

## 5. Conclusions

Using both test-particle and fluid descriptions of cosmic rays, we have shown that the cosmic ray and magnetic field energy densities are not correlated on scales less than the driving scale of the turbulence ( $l_0 \simeq 100$  pc in spiral galaxies). Furthermore, the two quantities are statistically independent of each other, so the synchrotron intensity can be expressed as the product of the average cosmic ray number density and average magnetic field strength. The presence of small-scale cosmic ray structures due to random magnetic traps can enhance the synchrotron intensity locally. Such effects must be considered while analyzing high-resolution synchrotron observations of spiral galaxies. Our results do not exclude that energy equipartition may hold at scales larger than  $l_0$ .

## References

- Basu, A., & Roy, S. 2013, *MNRAS*, 433, 1675  
 Beck, R. 2016, *ARAA*, 24, 4  
 Beck, R., & Krause, M. 2005, *AN*, 326, 414  
 Burbidge, G. R. 1956, *ApJ*, 124, 416  
 Cesarsky, C. J. 1980, *ARAA*, 18, 289  
 Chi, X., & Wolfendale, A. W. 1993, *Nature*, 362, 610  
 Duric, N. 1990, in IAU Symposium, Vol. 140, Galactic and Intergalactic Magnetic Fields, ed. R. Beck, R. Wielebinski, & P. P. Kronberg, 235  
 Mao, S. A., McClure-Griffiths, N. M., Gaensler, B. M., et al. 2012, *ApJ*, 759, 25  
 Seta, A., Shukurov, A., Wood, T. S., Bushby, P. J., & Snodin, A. P. 2018, *MNRAS*, 473, 4544  
 Shukurov, A., Snodin, A. P., Seta, A., Bushby, P. J., & Wood, T. S. 2017, *ApJL*, 839, L16  
 Snodin, A. P., Brandenburg, A., Mee, A. J., & Shukurov, A. 2006, *MNRAS*, 373, 643  
 Yoast-Hull, T. M., Gallagher, J. S., & Zweibel, E. G. 2016, *MNRAS*, 457, L29

# Simulations of the polarized sky for the SKA

F. Loi<sup>1,2</sup>, M. Murgia<sup>2</sup>, F. Govoni<sup>2</sup>, V. Vacca<sup>2</sup>, I. Prandoni<sup>3</sup>, H. Li<sup>4</sup>, L. Feretti<sup>3</sup>, and G. Giovannini<sup>1</sup>

<sup>1</sup>Dip. di Fisica e Astronomia, Università degli Studi di Bologna, Viale Berti Pichat 6/2,  
I-40127 Bologna, Italy  
email: francesca.loi@inaf.it

<sup>2</sup>INAF-Osservatorio Astronomico di Cagliari, Via della Scienza 5, Selargius, Italy

<sup>3</sup>INAF-Istituto di Radioastronomia, Via Gobetti 101, I-40129 Bologna, Italy

<sup>4</sup>Theoretical Astrophysics, Los Alamos National Laboratory, Los Alamos, NM

**Abstract.** It is expected that the Square Kilometre Array will have a huge impact on the study of cosmic magnetism. However, it is not easy to quantify such an impact and to understand how the information about the magnetic fields can be extracted from SKA data. This project aims at answering these questions by realizing full-Stokes simulations of the radio sky at the depth that SKA it is expected to reach.

**Keywords.** polarization, radio continuum: magnetic fields, galaxies, galaxies: clusters: general, methods: numerical

---

## 1. Introduction

Numerical simulations are ideal instruments to forecast the scientific impact of future instrument as well as best suited frameworks to test sophisticated techniques of data analysis. With the advent of the Square Kilometre Array (SKA) we expect to improve our knowledge about the presence and the evolution of magnetic fields in the Universe. In this respect, an all-sky survey in polarization performed with SKA1-MID will be extremely precious since it will yield a Rotation Measure (RM) Grid of about 230-450 RM sources per square degree (Johnston-Hollitt et al. 2015). However, we have to get prepared to manage the huge amount of data that the SKA will collect and also understand how correctly interpret the information from this grid.

With this project we want to answer to these questions using a computational tool which can generate a synthetic radio observation of one or more galaxy clusters in I, U, and Q Stokes parameters, taking into account the contribution of all the radio discrete sources present in the field-of-view of our mock observation. This tool is implemented in the FARADAY software package (Murgia et al. 2004), which has been specifically designed for intracluster magnetic fields studies.

In Sect. 2, we briefly describe the basic models which allow us to produce all the properties of a radio source population distributed in a given slice of the Universe. Moreover, we illustrate the details of the Magneto-Hydro-Dynamical (MHD) simulations used to reproduce the intracluster medium (ICM) characteristics (i.e. magnetic field, thermal density and temperature) of a pair of galaxy clusters; we also show the resulting X-ray surface brightness and the total and polarized radio intensity emission of this system. In Sect. 3, we show the results of the RM Synthesis technique (e.g. Brentjens & de Bruyn 2005, Burn 1966) applied on the simulated U, Q data while the conclusion are drawn in Sect.

4. Throughout the paper, we adopt a  $\Lambda$ CDM cosmology with  $H_0 = 71 \text{ km} \cdot \text{s}^{-1} \text{Mpc}^{-1}$ ,  $\Omega_m = 0.27$ , and  $\Omega_\Lambda = 0.73$ .

## 2. Overview

The emission of a radio source depends on many properties, such as redshift, type, size, luminosity, morphology, spectral properties, and intrinsic polarization. Thus, in order to simulate the I, U, and Q data of a radio source population we have to specify all this features.

We consider the following two families of radio sources depending on the mechanism which feeds the radio emission: active galactic nuclei (AGNs) and star forming galaxies (SFGs). We modeled our radio sources using the radio luminosity functions of Lin & Mohr (2007), Novak et al. (2017), and Smolčić et al. (2017) for what concerns the cluster and the external sources respectively. The size is assigned according to Wilman et al. 2008. The spatial distribution of cluster-embedded radio sources is determined following the profile of Lin & Mohr (2007). To reproduce the morphology and the spectral-polarimetry properties of radio sources we use high-frequency and high-resolution observations of real radio sources of different type or morphology (for example SFGs, type I and type II Fanaroff & Riley 1974 radio galaxies and head-tail radio galaxies).

For the intracluster magnetic field, the thermal plasma density distribution, and the temperature we use a cosmological MHD simulation of a pair of galaxy clusters, where the intracluster magnetic fields are injected by AGNs at  $z \sim 3$  while the system is observed at  $z = 0.205$ . This simulation has been obtained with the ENZO code (Collins et al. 2010) and consists in a set of 3-dimensional cubes of  $\sim (6.4 \text{ Mpc})^3$  with a resolution of  $\sim 10.7 \text{ kpc}$  containing the ICM physical parameters.

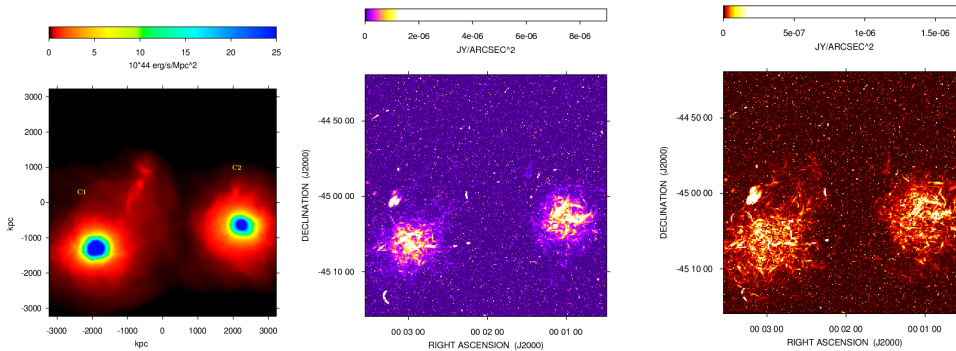

**Figure 1.** *Left:* X-ray surface brightness of a pair of galaxy clusters at redshift  $z=0.205$ , in a field-of-view of  $\sim 6.4 \text{ Mpc}$  with a spatial resolution of  $\sim 10.7 \text{ kpc}$ . *Center and right:* total intensity and polarized intensity radio emission between 1.4 GHz of the cluster-embedded, foreground and background discrete radio sources plus the cluster radio halos; the beam  $\text{FWHM}=2.5''$ .

By using the FARADAY software package, we reproduce the X-ray surface brightness of the system, shown on the left of Fig. 1. By illuminating the cluster magnetic fields with a relativistic particle population, we can also simulate the emission of the radio halos hosted by the clusters (as it has been done in Govoni et al. 2013). The central and the right images of Fig. 1 show the total intensity and polarized intensity associated to the clusters and simulated with FARADAY taking into account the foreground, cluster-embedded, background discrete radio source as well as the hosted radio halos. The signal has been reproduced for a 950-1760 MHz band, with a channel resolution of  $\sim 1.46 \text{ MHz}$ ,

corresponding to Band 2 of SKA1-MID. The field of view is  $\sim 0.3 \text{ deg}^2$  and the synthesized beam full-width-at-half-maximum (FWHM) is equal to  $2.5''$ . We can appreciate the wealth of details of these simulated images: from the fine structure of the discrete radio sources to the large scale filaments of the radio halos. The polarized sky appears bright and rich of discrete radio sources but also the radio halos shine in polarization reaching levels of fractional polarization higher than 10% from distances larger than a few hundreds of kpc from the cluster centers.

We did not add the thermal noise to these mock observations. Indeed, this can be seen as an ideal case since it would be necessary a very long observational time to reach the confusion limit in U and Q. However, as we will see in the next Section, this case is useful to understand how to interpret the results of the RM Synthesis data analysis.

### 3. The RM Synthesis applied on mock SKA observations

We decided to apply the RM Synthesis technique to three sets of data: the background radio sources, the radio halos, and all the sources together. The interval in Faraday depth explored in our analysis goes from  $-5000 \text{ rad/m}^2$  to  $5000 \text{ rad/m}^2$  with a spacing of  $10 \text{ rad/m}^2$ . The resulting transfer function has a FWHM of  $40 \text{ rad/m}^2$ .

For the sake of simplicity in Fig. 2 we only show the results from a region centered on the left galaxy cluster of Fig. 1: each row refer respectively to the background radio sources (top), the radio halo (middle), and all the sources in the field-of-view (bottom). From left to right, the first column shows the theoretical RM images as computed from the magnetic field and the thermal density given by the MHD simulations, the central one results from the application of the RM Synthesis to the data, the last column shows the comparison between the theoretical  $\sigma_{RM}$  profile and the one measured in the RM Synthesis images.

We notice that the density of background radio sources is enough to cover the entire cluster area, moreover, the image and the  $\sigma_{RM}$  profile inferred from the RM synthesis reproduce well the theoretical ones. The RM synthesis images of radio halos present micro-structures with respect to the theoretical images; this is due to the fact that the RM synthesis provides us with the RM of the polarized peak of the radio halo filaments, and their position along the line of sight could be different for close lines of sight which share the same theoretical RM value. The  $\sigma_{RM}$  profile presents slightly higher values at less than 500 kpc from the cluster centers. When we consider all the sources together we notice that the behavior of the radio halo dominates. Even if not all the clusters do host a radio halo, we can still have similar effects: indeed multiple radio sources inside the ICM and/or extended Faraday screens can behave like radio halos. Thus, it is important to understand what we observe in order to properly interpret the results.

### 4. Conclusions

Band 2 observation with the SKA1-MID are potentially very well suited for intracluster magnetic field studies through the measure of the RM. The population of background radio sources composing the RM grid will permit a very precise reconstruction of the "true" cluster RM. Moreover, we notice that radio halos are conceivably useful in the determination of the RM of galaxy clusters through the RM Synthesis technique, although in depth study of this technique is crucial to correctly interpret the results, highlighting the importance of this kind of simulations.

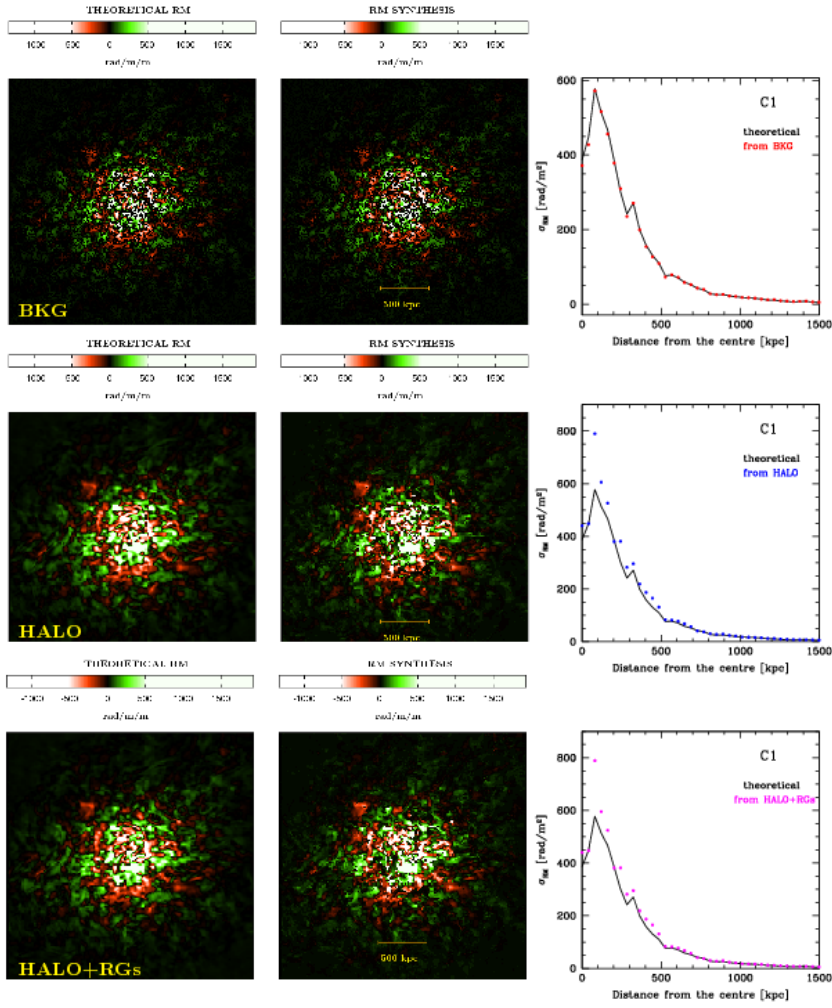

**Figure 2.** From left to right: Theoretical RM as computed from the MHD cubes, results of the RM synthesis applied on U,Q Stokes simulated cubes, profile of the theoretical RM compared to what measured in the RM Synthesis image for, respectively, the background discrete radio sources (top), the radio halo (middle), and the foreground, background, cluster-embedded diffuse and discrete sources (bottom) of the galaxy cluster on the left in Fig. 1.

## References

- Brentjens M. A., de Bruyn A. G., 2005, *A&A*, 441, 1217  
 Burn B. J. 1966, *MNRAS*, 133, 67  
 Collins, D. C., Xu, H., Norman, M. L., Li, H., & Li, S. 2010, *ApJS*, 186, 308  
 Fanaroff, B. L., & Riley, J. M. 1974, *MNRAS*, 167, 31P  
 Govoni, F., Murgia, M., Xu, H., et al. 2013, *A&A*, 554, A102  
 Johnston-Hollitt, M., Govoni, F., Beck, R., et al. 2015, *Advancing Astrophysics with the Square Kilometre Array (AASKA14)*, 92  
 Lin, Y.-T., & Mohr, J. J. 2007, *ApJS*, 170, 71  
 Murgia, M., Govoni, F., Feretti, L., et al. 2004, *A&A*, 424, 429  
 Novak, M., Smolčić, V., Delhaize, J., et al. 2017, *A&A*, 602, A5  
 Smolčić, V., Novak, M., Delvecchio, I., et al. 2017, *A&A*, 602, A6  
 Wilman, R. J., Miller, L., Jarvis, M. J., et al. 2008, *MNRAS*, 388, 1335

# From the NVSS RM Catalogue to Future Polarisation Surveys

Yik Ki Ma<sup>1</sup> †, S. A. Mao<sup>1</sup>, Jeroen Stil<sup>2</sup>, Aritra Basu<sup>3,1</sup>,  
Jennifer West<sup>4</sup>, Carl Heiles<sup>5</sup>, Alex S. Hill<sup>6,7,8</sup>, and S. K. Betti<sup>9</sup>

<sup>1</sup>Max-Planck-Institut für Radioastronomie, Auf dem Hügel 69, 53121 Bonn, Germany  
email: ykma@mpifr-bonn.mpg.de

<sup>2</sup>Department of Physics and Astronomy, University of Calgary, 2500 University Drive NW,  
Calgary, AB T2N 1N4, Canada

<sup>3</sup>Fakultät für Physik, Universität Bielefeld, Postfach 100131, 33501 Bielefeld, Germany

<sup>4</sup>Dunlap Institute for Astronomy and Astrophysics, The University of Toronto, 50 St. George  
Street, Toronto, ON M5S 3H4, Canada

<sup>5</sup>Department of Astronomy, University of California, Berkeley, CA 94720-3411, USA

<sup>6</sup>Department of Physics and Astronomy, The University of British Columbia, Vancouver, BC  
V6T 1Z1, Canada

<sup>7</sup>Space Science Institute, Boulder, CO, USA

<sup>8</sup>National Research Council Canada, Herzberg Program in Astronomy and Astrophysics,  
Dominion Radio Astrophysical Observatory, PO Box 248, Penticton, BC V2A 6J9, Canada

<sup>9</sup>Department of Astronomy, University of Massachusetts, 710 North Pleasant Street, Amherst,  
MA 01003-9305, USA

## Abstract.

With rotation measure (RM) towards 37,543 polarised sources, the Taylor *et al.* (2009) RM catalogue has been widely exploited in studies of the foreground magneto-ionic media. However, due to limitations imposed by observations in survey mode in the narrowband era, the listed RM values are inevitably affected by various systematic effects. With new Karl G. Jansky Very Large Array (VLA) broadband spectro-polarimetric observations at L-band, we set off to observationally examine the robustness of the Taylor catalogue. This would facilitate combinations and comparisons of it with results from current and future polarisation surveys such as Polarization Sky Survey of the Universe's Magnetism (POSSUM), VLA Sky Survey (VLASS), and the eventual Square Kilometre Array (SKA). Our on-axis pointed observations, in conjunction with simulations, allowed us to estimate the impact of off-axis polarisation leakage on the measured RM values. This demonstrates the importance to properly calibrate for the off-axis leakage terms in future all-sky polarisation surveys, in order to obtain high fidelity polarisation information from sources down to low fractional polarisation.

**Keywords.** galaxies: active — galaxies: magnetic fields — ISM: magnetic fields — radio continuum: galaxies

---

## 1. Introduction

Magnetic fields are known to be essential for the astrophysics in, for example, star formation, propagation of cosmic rays, and outflows and evolution of galaxies (see review by Beck & Wielebinski 2013; Beck 2016). One way to probe astrophysical magnetic fields is by quantifying the amount of Faraday rotation experienced by the linear-polarised

† Member of the International Max Planck Research School (IMPRS) for Astronomy and Astrophysics at the Universities of Bonn and Cologne

synchrotron emission from background extragalactic sources (EGSs) in radio regime. This process changes the polarisation position angle (PA; [rad]) by

$$\Delta\text{PA} = \left[ 0.81 \int_{\ell}^0 n_e(s) B_{\parallel}(s) ds \right] \cdot \lambda^2 \equiv \text{RM} \cdot \lambda^2, \quad (1.1)$$

where  $\ell$  [pc] is the (physical) distance to the background source,  $n_e$  [ $\text{cm}^{-3}$ ] is the thermal electron density,  $B_{\parallel}$  [ $\mu\text{G}$ ] is the magnetic field strength along the line of sight ( $s$  [pc]; increases away from the observer),  $\lambda$  [m] is the wavelength of the polarised emission in question, and  $\text{RM}$  [ $\text{rad m}^{-2}$ ] is the rotation measure of the background source. In other words, the average magnetic field strength (and direction) along the line of sight, weighted by  $n_e$ , is imprinted in the RM value of the polarised background source. This can be exploited in so-called RM-grid experiments, where RM measurements of numerous polarised background sources are performed to reveal the magnetic field strengths and structures in foreground astrophysical sources (e.g. Mao *et al.* 2008; Mao *et al.* 2010; Harvey-Smith *et al.* 2011; Van Eck *et al.* 2011; Gießübel *et al.* 2013; Kaczmarek *et al.* 2017; Mao *et al.* 2017).

The largest RM catalogue to date is the Taylor *et al.* (2009) catalogue, in which the RM values were determined using narrowband Very Large Array (VLA) data at 1364.9 and 1435.1 MHz (with bandwidths of 42 MHz each) in 1990s from the NRAO VLA Sky Survey (NVSS; Condon *et al.* 1998). With reported values through 37,543 lines of sight north of  $\delta = -40^\circ$  (at a source density of about  $1 \text{ deg}^{-2}$ ), the Taylor catalogue allows studies of cosmic magnetism in astrophysical structures with angular sizes larger than several degrees (e.g. Harvey-Smith *et al.* 2011; Stil *et al.* 2011; Purcell *et al.* 2015). While ongoing broadband polarisation surveys such as Polarization Sky Survey of the Universe's Magnetism (POSSUM; Gaensler *et al.* 2010) and VLA Sky Survey (VLASS; Myers *et al.* 2014), as well as the eventual Square Kilometre Array (SKA), will grant us much higher RM densities over the entire sky (see S. A. Mao in this volume), the Taylor catalogue will still remain a unique window to the magnetised Universe by complementing POSSUM and SKA in sky domain and VLASS in frequency domain. Comparisons between the Taylor catalogue and future survey results will also allow studies of polarisation time variabilities over more than 20 years.

Given the significance of the Taylor catalogue, we have investigated its robustness using new broadband data from the Karl G. Jansky VLA. The full results on  $n\pi$ -ambiguity and off-axis polarisation leakage in the Taylor catalogue, as well as Faraday complexities and potential RM time variabilities of our target sources, are reported in Ma *et al.* (submitted). In this proceedings, we focus on the implications of the off-axis instrumental polarisation leakage in the Taylor catalogue. The observation details are described in Section 2. The effects of  $n\pi$ -ambiguity and off-axis leakage are discussed in Sections 3 and 4. We draw the conclusion and remark on future polarisation surveys in Section 5.

## 2. New Broadband Observations

From the Taylor catalogue, we selected a sample of 23 sources for our new spectropolarimetric observations. These sources have high RM magnitudes of  $\gtrsim 300 \text{ rad m}^{-2}\ddagger$ , have Galactic latitude of  $|b| > 10^\circ$ , and have NVSS flux densities higher than 100 mJy. The unusually high  $|\text{RM}|$  values of these sources make them prime  $n\pi$ -ambiguity candidates in the Taylor catalogue (see Ma *et al.* submitted).

New broadband data were obtained using Karl G. Jansky VLA in L-band (1–2 GHz)

$\ddagger$  Except for NVSS J234033+133300, which has  $\text{RM}_{\text{Taylor}} = +56.7 \pm 6.3 \text{ rad m}^{-2}$ .



in D-array configuration on 2014 July 03. The total integration time per source is about 3–4 minutes, with our targets placed on the pointing axis of the antennae to ensure no off-axis instrumental effects are present in our data. Standard flagging and calibration procedures were applied to the data, including one iteration of phase self calibration on the target sources. From this, we formed two sets of Stokes  $I$ ,  $Q$ , and  $U$  images — “full band images” utilising the entire usable band, binning 4 MHz of visibility data for each step in frequency, and “NVSS band images” formed with nearly identical frequency coverages as that of the NVSS survey data used by the Taylor catalogue, albeit some flaggings were done to our data in those frequency ranges. On one hand, we use the full band images, combined with the RM-Synthesis algorithm (Brentjens & de Bruyn 2005), to obtain the Faraday depth (FD; the generalisation of RM, see e.g. Brentjens & de Bruyn 2005, Ma *et al.* submitted) of our sources free of  $n\pi$ -ambiguity. On the other hand we use the NVSS band images to make direct comparisons with the Taylor catalogue results.

### 3. $n\pi$ -ambiguity in the Taylor Catalogue

We compared the FD from RM-Synthesis on our full-band images with the RM from the Taylor catalogue ( $\text{RM}_{\text{Taylor}}$ ), and found that the difference between these two sets of values for nine of our targets are consistent with that expected from  $n\pi$ -ambiguity in the Taylor catalogue. By comparing the statistical properties of these sources versus that of sources with reliable RM values, we estimate that there may be more than 50  $n\pi$ -ambiguity sources out of the 37,543 Taylor catalogue sources.

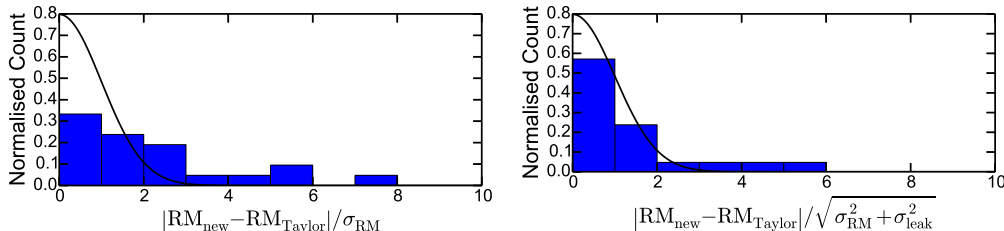

**Figure 1.** Comparisons between our  $\text{RM}_{\text{new}}$  and  $\text{RM}_{\text{Taylor}}$ . **(Left)** Histogram of RM differences in units of RM uncertainties of the observations ( $\sigma_{\text{RM}}$ ); **(Right)** The same histogram as the left panel, except that we have accounted for the extra RM uncertainty due to off-axis leakage ( $\sigma_{\text{leak}}$ ). The black line in both panels shows a folded normal distribution, which is the expected profile of the histogram if the RM differences are purely due to the included uncertainties.

### 4. Polarisation Discrepancies due to Off-axis Polarisation Leakage

Through careful comparisons between our results and those from the Taylor catalogue, we noted discrepancies in polarisation properties from the two studies. Firstly, from RM-Synthesis analysis in Section 3, we found that two of our target sources are unpolarised ( $\lesssim 0.07\%$  at  $6\sigma$ ), though they are listed as  $\approx 0.5\%$  polarised in the Taylor catalogue with signal-to-noise of over 30 in polarisation. Secondly, the RM derived from our new NVSS band images ( $\text{RM}_{\text{new}}$ ) and  $\text{RM}_{\text{Taylor}}$  do not match within measurement uncertainties (Figure 1 Left), after correcting both for  $n\pi$ -ambiguity using the broadband FD obtained in Section 3.

These discrepant polarisation properties are mainly due to off-axis polarisation leakage in the Taylor catalogue. A simulation was conducted to quantify its effect on RM

measurements in the Taylor catalogue. Using the Taylor catalogue listed values (specifically, total intensity, polarised intensity, and  $\text{RM}_{\text{Taylor}}$ ) as inputs, we injected an artificial polarisation leakage signal with amplitudes fixed at 0.5% of the total intensity to the source polarisation signal, and compared the derived RM with and without this leakage effect (see Ma *et al.* submitted for details of the simulation). We found that on average, the effect of the uncorrected off-axis polarisation leakage can be taken into account by increasing the listed RM uncertainties in the Taylor catalogue by 10%. By incorporating this extra RM uncertainty to our sources, we find that the discrepancies between  $\text{RM}_{\text{new}}$  and  $\text{RM}_{\text{Taylor}}$  can be mostly explained (Figure 1 Right), except for three sources where significant RM differences still remain. This could be due to true RM time variabilities which will be investigated in a future study (Ma *et al.* in prep).

## 5. Conclusion and Outlook to Future Polarisation Surveys

In this proceedings, we reported our findings on the robustness of RM values reported in the Taylor catalogue. Our results suggest that the  $n\pi$ -ambiguity may affect the RM values of more than 50 out of the total of 37,543 sources in the Taylor catalogue. Furthermore, the uncorrected off-axis polarisation leakage in the NVSS data results in an extra 10% in Taylor RM uncertainties. These effects must be taken into account in future studies utilising this RM catalogue.

We demonstrated the effect of uncorrected off-axis instrumental polarisation on RM measurements in the specific case of the Taylor catalogue. This same instrumental effect can also impact future broadband polarisation surveys, manifested as an artificial signal in Faraday spectrum near  $0 \text{ rad m}^{-2}$  (see J. Stil in this volume). To ensure high fidelity in Faraday spectra, particularly from sources with low fractional polarisation, current and future polarisation surveys must properly characterise and remove the off-axis polarisation leakage terms.

## References

- Beck R. 2016, *A&ARv*, 24, 4  
 Beck R., Wiełebinski R. 2013, *Planets, Stars and Stellar Systems Vol. 5. Springer, Berlin, Germany, p. 641*  
 Brentjens M. A., de Bruyn A. G. 2005, *A&A*, 441, 1217  
 Condon J. J., Cotton W. D., Greisen E. W., Yin Q. F., Perley R. A., Taylor G. B., Broderick J. J. 1998, *AJ*, 115, 1693  
 Gaensler B. M., Landecker T. L., Taylor A. R., POSSUM Collaboration 2010, *BAAS*, 42, 515  
 Gießbübel R., Heald G., Beck R., Arshakian T. G. 2013, *A&A*, 559, A27  
 Harvey-Smith L., Madsen G. J., Gaensler B. M. 2011, *ApJ*, 736, 83  
 Kaczmarek J. F., Purcell C. R., Gaensler B. M., McClure-Griffiths N. M., Stevens J. 2017, *MNRAS*, 467, 1776  
 Mao S. A., Gaensler B. M., Stanimirović S., Haverkorn M., McClure-Griffiths N. M., Staveley-Smith L., Dickey J. M. 2008, *ApJ*, 688, 1029  
 Mao S. A., Gaensler B. M., Haverkorn M., Zweibel E. G., Madsen G. J., McClure-Griffiths N. M., Shukurov A., Kronberg P. P. 2010, *ApJ*, 714, 1170  
 Mao S. A., *et al.* 2017, *Nature Astronomy*, 1, 621  
 Myers S. T., Baum S. A., Chandler C. J. 2014, *BAAS*, 223, 236.01  
 Purcell C. R., *et al.* 2015, *ApJ*, 804, 22  
 Stil J. M., Taylor A. R., Sunstrum C. 2011, *ApJ*, 726, 4  
 Taylor A. R., Stil J. M., Sunstrum C. 2009, *ApJ*, 702, 1230  
 Van Eck C. L., *et al.* 2011, *ApJ*, 728, 97

# New Insights on Galactic Dynamos

Luke Chamandy<sup>1†</sup>, Anvar Shukurov<sup>2‡</sup> & A. Russ Taylor<sup>3,4¶</sup>

<sup>1</sup>Department of Physics and Astronomy, University of Rochester, Rochester NY 14627, USA

<sup>2</sup>School of Mathematics, Statistics & Physics, Newcastle University, Newcastle upon Tyne  
NE1 7RU

<sup>3</sup>Department of Physics and Astronomy, University of the Western Cape, Belleville 7535,  
Republic of South Africa

<sup>4</sup>Astronomy Department, University of Cape Town, Rondebosch 7701,  
Republic of South Africa

**Abstract.** We argue that pitch angles of the azimuthally averaged large-scale or mean magnetic fields in nearby spiral galaxies inferred from observations can tentatively be explained with simple galactic dynamo models. Agreement is not perfect, but is reasonable considering the uncertainty in dynamo parameters.

**Keywords.** Dynamo, galaxies: ISM, galaxies: magnetic fields, galaxies: spiral, magnetic fields

---

## 1. Introduction

Large-scale (or mean) galactic magnetic fields are observed to be in near-equipartition with turbulent kinetic energy in nearby galaxies, which suggests that the dynamo has likely reached saturation. The most basic properties of the mean magnetic field are its strength  $B$  and direction; the latter is characterized by the pitch angle  $p = \arctan(B_r/B_\phi)$ , with  $-90^\circ < p \leq 90^\circ$ , where  $B_r$  and  $B_\phi$  are the radial and azimuthal components in cylindrical geometry  $(r, \phi, z)$ . The quantity  $p$  is arguably more useful for testing galactic dynamo theory than  $B$ , for three reasons. Firstly, unlike  $B$ ,  $p$  is insensitive to the extent to which the dynamo instability is supercritical. Secondly,  $p$  is insensitive to details of the dynamo non-linearity while  $B$  is not. And thirdly,  $p$  is more directly and accurately inferred from observation than  $B$ .

The analytical expression for the magnetic pitch angle in the saturated (steady) state in the local axisymmetric dynamo model of Chamandy, Shukurov & Subramanian (2014) can be compared with pitch angles inferred from observations (Van Eck 2015 and references therein). Because estimates of the effects of a mean outflow (wind or fountain flow) tend to be too small to significantly affect the dynamo for the galaxies for which data exists to enable such estimates, the formula effectively reduces to

$$p \simeq -\arctan \left[ \frac{\pi^2 \tau}{12q\Omega} \left( \frac{u}{h} \right)^2 \right], \quad (1.1)$$

where  $\tau$  is the turbulent correlation time,  $\Omega$  is the angular rotation speed,  $q = -d \ln \Omega / d \ln r$  with  $r$  the galactocentric distance ( $q = 1$  for a flat rotation curve),  $u$  is the turbulent speed of the largest eddies and  $h$  is the scale height of diffuse gas.  $p < 0$  for a trailing spiral. Van Eck et al. (2015) found that (i) theoretical values of  $|p|$  are much too small compared with observations, and (ii) observational and theoretical values are uncorrelated. In Chamandy, Shukurov & Taylor (2016) we refined their model in three ways:

† lchamandy@pas.rochester.edu  
‡ anvar.shukurov@ncl.ac.uk  
¶ russ@ast.uct.ac.za

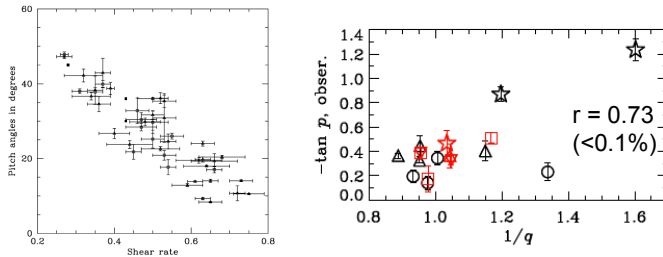

**Figure 1.** Observational data showing correlations between  $p_a$  and  $q$  (left, reproduced from Seigar et al. 2006), and  $p$  and  $q$  (right, adapted from Chamandy, Shukurov & Taylor 2016, with Pearson correlation coefficient and corresponding null probability).

(i) we solved the  $\alpha^2\Omega$  local axisymmetric dynamo equations numerically in 1.5D in  $z$ , evolving the mean magnetic field up to the steady state, (ii) rather than taking  $h$  as a parameter, we modeled  $h(r)$  based on the flared HI Milky Way disc model of Kalberla & Dedes (2008) scaled to  $h = 400$  pc at  $r = 8$  kpc (Ruzmaikin et al. 1988) and scaled radially by the ratio of  $r_{25}$  to that of the Milky Way, and (iii) rather than adopting  $\tau = 10$  Myr, we took  $\tau$  to be a free parameter: this leads to a ‘best fit’ value of  $\tau \approx 14$  Myr. Like Van Eck et al. (2015) we adopted  $u = 10 \text{ km s}^{-1}$ , comparable to the sound speed of the warm gas, and used the same compiled observational data for  $\Omega(r)$  and  $q(r)$ .

## 2. Accuracy and applicability of local axisymmetric solutions

It has been shown that 1.5D axisymmetric saturated solutions and even simplified 0.5D solutions (see Eq. 1.1) approximate accurately 2.5D solutions in  $(r, z)$  outside of the central few hundred pc of the galaxy, especially when galactic outflows are weak (Chamandy 2016). A possible objection to our approach is the neglect of non-axisymmetry. While the  $m = 0$  azimuthal Fourier mode of the dynamo tends to dominate in axisymmetric discs, non-axisymmetric discs can excite higher order modes (e.g. Chamandy, Shukurov & Subramanian 2015), but non-axisymmetric mean magnetic modes are generally found to be weak (Fletcher 2010). Weak non-axisymmetric modes are expected to exert only a very minor perturbation on the axisymmetric mode (Chamandy, Subramanian & Shukurov 2013). Nevertheless, it has been suggested that since the mean field tends to ‘follow’ the spiral arms, there must be a causal effect. Firstly, the premise is not supported by wavelet analysis which has shown that polarization angles in galaxies are consistently larger than spiral arm pitch angles  $p_a$  (Frick et al. 2016, Berkhuijsen et al. 2016, Mulcahy, Beck & Heald 2017). Secondly, even if spiral arm and mean magnetic field pitch angles are correlated (whether this is true is not yet clear), such a correlation does not imply the existence of a causal relationship, and, moreover, a correlation would indeed be expected from their common correlation with the shear rate. This is demonstrated in Fig. 1: the left panel shows a plot of  $|p_a|$  vs.  $q/2$ , from Seigar et al. 2006, while the right panel shows  $\tan |p|$  vs.  $1/q$  (see Eq. 1.1) from Chamandy, Shukurov & Taylor (2016) (neglecting the galaxy M81 and SB-type galaxies, whose mean magnetic fields are observed to be highly non-axisymmetric; see Krause et al. 1989 and Beck et al. 2005).

## 3. Results

In Fig. 2, model results for  $p$  (middle row, with open (closed) symbols representing numerical (analytical) solutions) are compared with values inferred from observations (top row), along with residuals (bottom row). Galaxies are separated into columns according

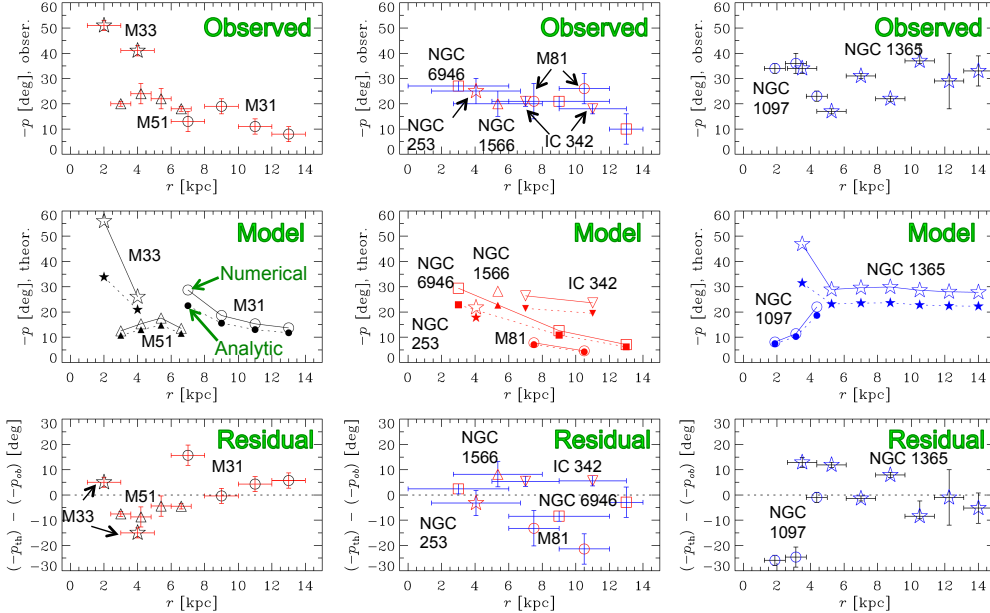

**Figure 2.** Pitch angle data inferred from observations (top), obtained from our fiducial dynamo model (middle), and their difference (bottom) for three different types of galaxy, organized into columns (adapted from Chamandy, Shukurov & Taylor 2016, see text for details).

to their type and magnetic field observations: the left-hand column contains SA galaxies for which Fourier analysis had been performed on the data (these observational data are the most reliable of those available), the middle column contains those SA or SAB galaxies for which such an analysis had not been performed, and the right-hand column contains SB galaxies. Agreement is not perfect, with  $\chi^2_{\nu} \sim 10$  for SA and SAB galaxies, but this is not surprising given that (i) the model is idealized, (ii) inferred values rely on observational modeling and likely have systematic uncertainties, and (iii) we chose to parameterize the model with only *a single free parameter*,  $\tau$ , even though other parameters are expected to vary between and within galaxies (Chamandy & Taylor 2015). For SB galaxies, which the model is *not* meant to explain, the agreement is worse (especially at small radius where the bar is strong and the magnetic field highly non-axisymmetric) than for unbarred or weakly barred galaxies. Kendall’s rank test can be performed on the pairs of pitch angles within each galaxy and shows that the model agrees with the SA and SAB galaxy data significantly better than a randomly ordered sample.

It is also encouraging that the ‘best fit’ value of  $\tau$  is of the expected order of magnitude. We also tried a model with  $h = \text{constant}$ , i.e. an unflared disc, and found that, regardless of the value of  $h$  used, agreement between model and data was much worse than with our fiducial flared disc model. We take this as evidence that galactic discs are flared, as would be expected from physical arguments (Rodrigues et al. 2018). Galactic dynamo theory has also been used to point out that the alignment of magnetic spiral *arms* (Beck & Hoernes 1996) with their gaseous counterparts suggests that the latter are winding up and transient, as opposed to rigidly rotating and steady (Chamandy, Shukurov & Subramanian 2015). Thus, magnetic fields can plausibly serve as probes of other phenomena, such as interstellar turbulence, disc flaring and spiral structure and evolution, even in cases where their dynamical influence may be weak or not fully apparent.

Finally, in Fig. 3, we compare our results (excluding M81 and SB galaxies, right panel)

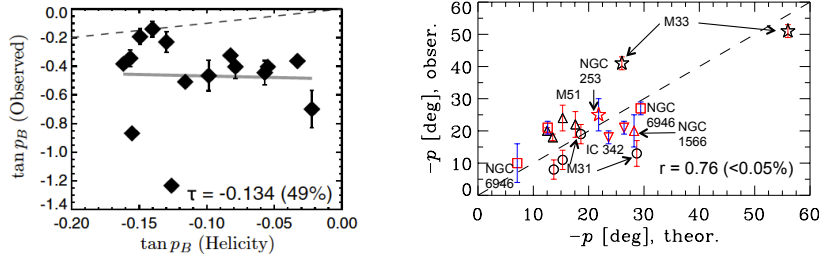

**Figure 3.** Plot of pitch angles derived from observation vs. values obtained from theory for the models of Van Eck et al. (2015) (left, reproduced from that work) and Chamandy, Shukurov & Taylor (2016) (right, with Pearson correlation coefficient and corresponding null probability).

with those of Van Eck et al. (2015) (left panel), showing that the current state of affairs is not as dire if our more detailed model that includes disc flaring is invoked.

#### 4. Conclusions

Our model can be made to be more realistic by including more physics: the gaseous galactic halo, independent constraints on parameters such as  $u$ , and revisiting the roles of outflows and non-axisymmetry. However, given the paucity and heterogeneity of the data, we feel that comparing with results of minimalistic dynamo models is a fruitful approach. There is a need to analyze presently available data as uniformly as possible with modern methods in order to expand and improve the data set. At the same time, there is a need to come up with alternative dynamo models (e.g. Chamandy & Singh 2018), as well as to simulate magnetic properties for large populations of galaxies throughout cosmic time (Rodrigues et al. 2018, see also L. F. S. Rodrigues, this volume).

#### References

- Beck, R. & Hoernes, P. 1996, *Nature*, 379, 47
- Beck, R., Fletcher, A., Shukurov, A., Snodin, A., Sokoloff, D. D., Ehle, M., Moss, D. & Shoutenkov, V. 2005, *A&A*, 444, 739
- Berkhuijsen, E. M., Urbanik, M., Beck, R. & Han, J. L. 2016, *A&A*, 588, A114
- Chamandy, L. 2016, *MNRAS*, 462, 4402
- Chamandy, L. & Taylor, A. R. 2015, *ApJ*, 808, 28
- Chamandy, L. & Singh, N. K. 2018, *MNRAS*, 481, 1300
- Chamandy, L., Subramanian, K. & Shukurov, A. 2013, *MNRAS*, 433, 3274
- Chamandy, L., Shukurov, A. & Subramanian, K. 2014, *MNRAS*, 443, 1867
- Chamandy, L., Shukurov, A. & Subramanian, K. 2015, *MNRAS*, 446, L6
- Chamandy, L., Shukurov, A. & Taylor, A. R. 2016, *ApJ*, 833, 43
- Fletcher, A. 2010, *ASPSCS*, 438, 197
- Frick, P., Stepanov, R., Beck, R., Sokoloff, D., Shukurov, A., Ehle, M. & Lundgren, A. 2016, *A&A*, 585, A21
- Kalberla, P. M. W. & Dedes, L. 2008, *A&A*, 487, 951
- Krause, M., Hummel, E. & Beck, R. 1989, *A&A*, 217, 4
- Mulcahy, D. D., Beck, R. & Heald, G. H. 2017, *A&A*, 600, A6
- Rodrigues, L. F. S., Chamandy, L., Shukurov, A., Baugh, C. M. & Taylor, A. R. 2018, *ArXiv e-prints*, 1809.10521
- Ruzmaikin, A. A., Shukurov, A. M. & Sokoloff, D. D. 1988, *Magnetic Fields of Galaxies*, Kluwer Dordrecht
- Seigar, M. S. 2006, *ApJ*, 645, 1012
- Van Eck, C. L., Brown, J. C., Shukurov, A. & Fletcher, A. 2015, *ApJ*, 799, 35

# The Role of Magnetic Fields in The Evolution of Galaxies

Fatemeh S. Tabatabaei

Instituto de Astrofísica de Canarias, Vía Láctea S/N, E-38205 La Laguna, Spain  
Departamento de Astrofísica, Universidad de La Laguna, E-38206 La Laguna, Spain  
School of Astronomy, Institute for Research in Fundamental Sciences, 19395-5531 Tehran, Iran  
email: [ftaba@ipm.ir](mailto:ftaba@ipm.ir)

**Abstract.** Magnetic fields constitute an energetic component of the interstellar medium in galaxies and, hence, can affect the formation of galactic structures. Sensitive resolved radio continuum observations together with statistical studies in galaxy samples are performed to investigate the origin and the impact of the magnetic fields. The JVLA cloud-scale survey of M33 unveils strong tangled magnetic field along the spiral arms and in the galaxy center indicating amplification due to compression and local shear in molecular clouds. Studying a sample of non-cluster, non-interacting galaxies, we find that the large-scale ordered magnetic field scales with the rotation speed of galaxies. The total and disordered magnetic fields scales with the star formation rate in normal star forming galaxies. On the other hand, a strong magnetic field in the center of NGC 1097—a massive galaxy undergoing star formation quenching—is found to be responsible for decelerating its massive star formation. Putting these results together, it is deduced that 1) the Universe was highly magnetized short after the peak of the massive star birth at about 1 Gyr after the Big Bang and 2) the strong magnetic field has possibly acted as back reaction after this time, quenching the massive star formation and stimulating the formation of low-mass stars in massive galaxies.

---

## 1. Introduction

Cosmic magnetic fields have been present since the very early Universe created through mechanisms such as plasma instabilities and cosmic batteries (e.g., Subramanian 2016). Theoretical studies show that, after the epoch of reionization, these weak seed fields ( $\lesssim 10^{-16}$  G) were amplified to stronger fields of  $\gtrsim \mu\text{G}$  through various processes such as compression and shear motions (Beck et al. 2013) or small-scale dynamos (e.g., Schober et al. 2013) on time-scales of few to hundreds of  $Myr$ . The amplification due to compression and shear occurs because the magnetic field lines are frozen into a fluid and due to the magnetic flux conservation law. The dynamo action, that is based on the energy conservation, converts kinetic energy from turbulence to magnetic energy. Theoretically, both mechanisms can occur in galaxies, and particularly in star forming regions where both supernova-driven turbulence and bulk motions of dense gas are present, however, a general picture of the origin of the field amplification in the interstellar medium (ISM) is missing and awaits sensitive and high-resolution observations in statistically meaningful galaxy samples.

Full polarization radio continuum observations make it possible to measure and map the magnetic field strength and structure in galaxies (see the review by Beck 2015). However, the radio continuum emission needs to be corrected first for contamination by the thermal free-free emission. This is particularly important in high-resolution studies of galaxies even at low frequencies. The dust-unbiased *Thermal Radio Template (TRT)* methods, developed by Tabatabaei et al. (2007), Tabatabaei et al. (2013), and Tabatabaei et al. (2018), map the thermal and the nonthermal synchrotron emission in galaxies

without any assumption about the synchrotron spectrum. These methods are sensitive to the diffuse ISM structures and hence ideal to study the role of the magnetic fields in the energy balance and structure formation in different locations in a galaxy. In addition to the high-resolution studies, surveys in galaxy samples are vital to probe any dependence on galactic properties such as mass, morphology, dynamics, and star formation rate shedding light on the origin and amplification mechanisms of the magnetic fields. Our recent observations in nearby galaxies and their implications for the evolution of galaxies are described as follows.

## 2. Large-scale magnetic field and galactic dynamics

The observed polarized radio continuum emission from spiral galaxies exhibits a large-scale ordered pattern which is often linked to the mean field  $\alpha - \Omega$  dynamo (e.g., Beck 2015) if the observed pitch angles agree with theoretical estimates (Shukurov 2004). However, a global picture connecting the strength of the large-scale magnetic field to dynamics of galaxies have been awaiting further observations to build a statistically meaningful sample. Defining this sample, it is also necessary to take into account the galactic environment as galaxy dynamics can be influenced by interactions and mergers. Putting together the available data of non-interacting, non-cluster galaxies with known large-scale magnetic fields, Tabatabaei et al. (2016) find a tight correlation between the strength of the integrated polarized flux density and the rotation speed  $v_{\text{rot}}$  of galaxies. This translates to an almost linear correlation between the large-scale magnetic field  $\overline{B}$  and  $v_{\text{rot}}$  assuming that the number of cosmic-ray electrons is proportional to the star formation rate, and a super-linear relation,  $\overline{B} \propto v_{\text{rot}}^{1.5}$ , assuming equipartition between magnetic fields and cosmic rays (Fig. 1). It is important to note that this correlation is

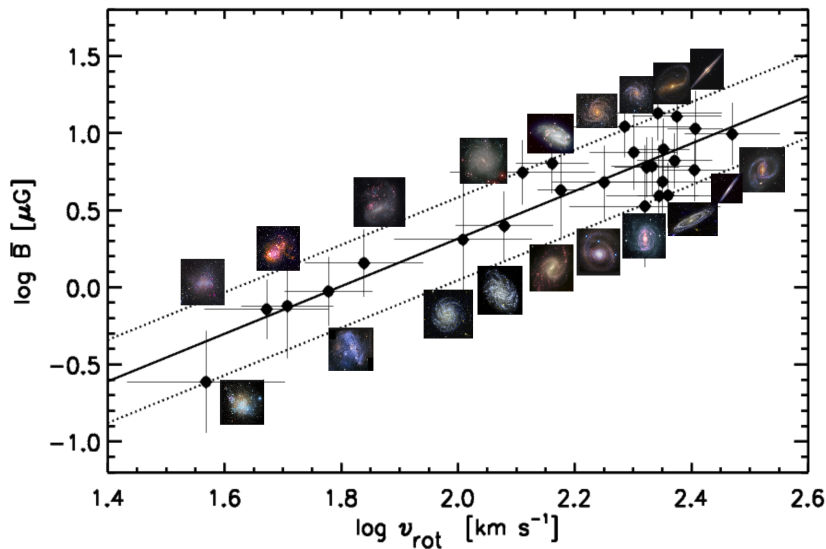

**Figure 1.** The large-scale magnetic field strength  $\overline{B}$  vs. the rotational speed of a sample of nearby non-cluster/non-interacting galaxies with available full polarization radio continuum data (Tabatabaei et al. 2016). Faster rotating and/or more massive galaxies have stronger ordered magnetic fields (with scales of  $\gtrsim 1$  kpc). This figure shows the case of the equipartition between the magnetic field and cosmic rays,  $\overline{B} \propto v_{\text{rot}}^{1.5}$ . A linear correlation holds assuming that the cosmic ray number is proportional to the star formation rate (not shown).



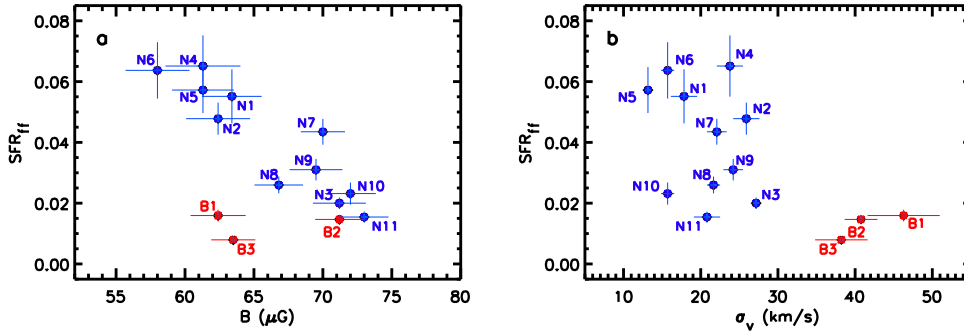

**Figure 2.** The massive star formation rate per free-fall,  $SFR_{ff}$ , of the GMAs decreases with the magnetic field strength  $B$  (a) while it is uncorrelated with the turbulent velocity  $\sigma_v$  (b). The blue and red points show the narrow- and broad-line GMAs, respectively. Strong non-circular motions/shocks in the broad-line GMAs can act as additional cause of the low  $SFR_{ff}$  in these clouds (Tabatabaei et al. 2018).

not due to the mean field  $\alpha - \Omega$  dynamo, as no correlation holds between  $\overline{B}$  and the differential rotation (or angular velocity  $\Omega$  for flat rotation curves). Instead, it shows a coupling between the ordered field and the dynamical mass of galaxies and indicates that gas compression and/or shear is an important mechanism ordering the large-scale ( $\gtrsim 1$  kpc) magnetic field in galaxies.

### 3. Origin of small-scale magnetic field

Only a minor fraction of the observed synchrotron emission from spiral galaxies is polarized (usually  $< 20\%$  at 4.8 GHz) meaning that a major part of the emission is due to a field that is varying on scales smaller than observation beam size. This field can be isotropic random and/or non-isotropic tangled field. The maps of the disordered field strength in star forming galaxies shows higher values in massive star forming regions (e.g.,  $B_{\text{dis}} \propto \Sigma_{\text{SFR}}^{0.16}$ , Tabatabaei et al. 2013) indicating possible act of the small-scale dynamo, although the supernovae-driven dynamo predicts a somehow higher power-law index of 0.3 (Gressel et al. 2008). This theoretical index matches better with the global studies of the *KINGFISHER* sample ( $B \propto \Sigma_{\text{SFR}}^{0.3}$ , Tabatabaei et al. 2017), the *SINGS* sample (Heesen et al. 2014), and a number of dwarf galaxies (Chyży et al. 2011).

The JVLA full-polarization observations of M33 at 6 GHz (5-7 GHz, Tabatabaei et al. in prep.) unveils a totally different view of the magnetized ISM at  $9''$  resolution (36 pc, scale of giant molecular clouds). The linearly polarized emission vectors nicely point towards the molecular clouds in star forming complexes and in the spiral arms exhibiting the tangled magnetic field. This field was previously undetected due to depolarization at the large beams of  $\gtrsim 120''$  (Tabatabaei et al. 2008). This also shows the importance of the compression/shear in ordering and amplification of the magnetic field on cloud scales.

### 4. Magnetic feedback controlling ISM structure and star formation

Investigating the ISM energy balance in the central kpc region of the quenching galaxy NGC 1097, Tabatabaei et al. (2018) find a major role of the magnetic field and cosmic rays in controlling the molecular clouds and star formation. Most of the giant molecular cloud associations (GMA) are magnetically supported against gravitational collapse and the star formation rate per free-fall drops with the magnetic field strength, while it is uncorrelated with the turbulence (Fig. 2). This explains the deviations from the star formation laws observed earlier by Hsieh et al. (2013).

## 5. Implications: magnetic field & quenching of galaxies

The dependency of the magnetic field strength on the star formation rate has an important consequence for the evolution of galaxies. As the cosmic star formation rate peaks at about 1 Gyr after the Big Bang, the magnetic field should also reach its maximum strength through compression and/or small-scale dynamo in a relatively short time scale. Considering that galaxies start to evolve after this time ( $t \gtrsim 1$  Gyr), it is then plausible that the magnetic field plays a role in this evolution. Recent discovery by Tabatabaei et al. (2018), shows that the strong magnetic field can decelerate massive star formation and can help the formation of low-mass stars. Hence, magnetic field has possibly acted as a back reaction after the peak of the star formation rate in the Universe, quenching massive star formation and stimulating the formation of big bulges of low-mass stars observed in quenched massive galaxies (e.g., Bell 2008).

### References

- Beck, A. M., Dolag, K., Lesch, H., & Kronberg, P. P. 2013, *Monthly Notices of the Royal Astronomical Society*, 435, 3575
- Beck, R. 2015, *The Astronomy and Astrophysics Review*, 24, 4
- Bell, E., F. 2008, *The Astrophysical Journal*, 682, 355
- Chyży, K. T., Weżgowiec, M., Beck, R., & Bomans, D. J. 2011, *Astronomy & Astrophysics*, 529, 94
- Gressel, O., Elstner, D., Ziegler, U., & Rüdiger, G. 2008, *Astronomy & Astrophysics*, 486, 35
- Heesen, V., Brinks, E., Leroy, A. K., Heald, G., et al. 2014, *The Astronomical Journal*, 147, 5
- Hsieh, P., Y., Matsushita, S., Liu, G., Ho, P., T., P., et al. 2013, *The Astrophysical Journal*, 736, 129
- Schober, J., Schleicher, D. R. G., & Klessen, R. S. 2013, *Astronomy & Astrophysics*, 560, 87
- Shukurov, A. 2004, *Mathematical Aspects of Natural Dynamos*, astro-ph/0411739
- Subramanian, K. 2016, *Reports on Progress in Physics*, 79, 6901
- Tabatabaei, F. S., Beck, R., Krügel, E., M. Krause, et al. 2007, *Astronomy & Astrophysics*, 475, 133
- Tabatabaei, F. S., M. Krause, Fletcher, A., & Beck, R. 2008, *Astronomy & Astrophysics*, 490, 1005
- Tabatabaei, F. S., Schinnerer, E., Murphy, E. J., R. Beck, et al. 2013, *Astronomy & Astrophysics*, 552, 19
- Tabatabaei, F. S., Martinsson, T. P. K., Knapen, J. H., Beckman, et al. 2016, *The Astrophysical Journal Letters*, 818, 10
- Tabatabaei, F. S., Schinnerer, E., Krause, M., Dumas, G., et al. 2017, *The Astrophysical Journal*, 836, 185
- Tabatabaei, F. S., Minguez, P., Prieto, M. A., & Fernández-Ontiveros, J. A. 2018, *Nature Astronomy*, 2, 83

# Magnetic Fields and Ram Pressure Stripping of Galaxies in Clusters

Craig L. Sarazin<sup>1</sup>, Rukmani Vijayaraghavan<sup>1</sup>, & Paul M. Ricker<sup>2</sup>

<sup>1</sup>Department of Astronomy, University of Virginia, 530 McCormick Rd.,  
Charlottesville, VA 22904, USA

email: sarazin@virginia.edu, rukmani@virginia.edu

<sup>2</sup>Department of Astronomy, University of Illinois, 1002 W. Green Street, Urbana, IL 61801,  
USA

email: pmricker@illinois.edu

**Abstract.** Numerical magneto-hydrodynamical (MHD) simulations of individual elliptical and disk galaxies undergoing ram pressure stripping in the intracluster medium (ICM) are described. These simulations include isotropic and anisotropic thermal conduction; in the latter case, heat is only conducted along magnetic field lines. Four initial magnetic field geometries are considered, with the field being either continuous or disjoint between the ICM and the galaxy interstellar medium (ISM), and with the large scale field being either parallel or perpendicular to the galaxy-ICM relative velocity. Elliptical galaxies are considered first. Unless thermal conduction is unsuppressed, the elliptical ISM evaporates too quickly to be consistent with the observations of small coronae and stripped gas tails in many large cluster ellipticals. Magnetic fields and anisotropic conduction reduce the effects of evaporation so that gas is stripped at about the same rate as in models with no conduction. The simulations of disk galaxies show that magnetic fields are required to produce stripped galaxies with long, coherent tails, as are observed in many cases. The magnetic fields help to confine the tails, and suppress Kelvin-Helmholtz (KH) instabilities. The structure of the tail depends on the geometry of the magnetic field; fields which are perpendicular to the relative velocity are more effective at confinement than parallel fields.

**Keywords.** Galaxies: clusters: general, magnetic fields, conduction, MHD, intergalactic medium, galaxies: evolution, galaxies: elliptical and lenticular, cD, galaxies: spiral

---

## 1. Introduction

The population of galaxies in clusters differs significantly from that in the field. Clusters primarily contain elliptical and S0 galaxies, which have very little cool gas or current star formation (e.g., Jaffé et al. 2016). One process which contributes to this difference is that gas-rich spiral galaxies which fall into clusters can have their gas stripped as a result of ram pressure as they move rapidly through the ICM. Indeed, tails of hot gas, cooler gas, and recently formed stars are seen behind galaxies falling into clusters (e.g., Sun et al. 2010). These spiral galaxies undergoing stripping are often referred to as “jellyfish galaxies.”

Here, we present the results of numerical hydrodynamical and MHD simulations of individual galaxies undergoing stripping. The ICM is assumed to be uniform at large distances from the galaxy, and the relative velocity is taken to be constant. We use the FLASH 4.3 N-body (dark matter and stars) and MHD adaptive-mesh grid code (Fryxell et al. 2000). In some of the simulations, we include isotropic or anisotropic (only along the magnetic field  $\mathbf{B}$ ) thermal conduction. We consider four initial magnetic field geometries; at large distances,  $\mathbf{B}$  is either parallel or perpendicular to the relative velocity, and the ICM and ISM magnetic fields are either continuous or disjoint. We have also done simulations of stripping of many galaxies in clusters with realistic orbits and

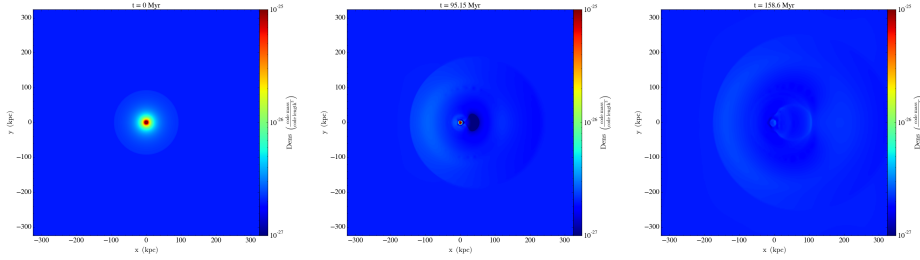

**Figure 1.** Slices of density in a simulation of ram pressure stripping of a spherical galaxy including full isotropic thermal conduction. The panels are the density initially, after 95 Myr, and after 159 Myr. The ISM evaporates rapidly, before ram pressure can act.

ICM density profiles (Vijayaraghavan & Ricker 2015, 2017), but these are not discussed here.

## 2. Elliptical Galaxies: Evaporation vs. Stripping

Many large elliptical galaxies in clusters are observed to retain small ( $\sim 3$  kpc) coronae of hot gas, which is cooler and denser than the ISM and in near pressure equilibrium (e.g., Sun et al. 2007). The statistics suggest that these galaxies retain this gas for  $\sim$ Gyr.

Thermal conduction is expected to be very effective in the ICM due to the high temperatures; unless inhibited, thermal conduction should cause the elliptical coronae to evaporate quickly, typically in  $\lesssim 100$  Myr. Figure 1 shows the density distribution in a simulation of a spherical galaxy with ram pressure and full isotropic conduction. Heat is rapidly conducted from the ICM into the ISM, and the ISM expands and evaporates quickly, before ram pressure has time to act. As a result, no ram pressure tail is formed.

The gyroradii of electrons in the ICM magnetic field are very small. As a result, one expects that heat can only be conducted parallel to the field. This can reduce the effects of thermal conduction. If the galaxy is moving through the ICM, the ICM magnetic field lines will be wrapped (“draped”) around the galaxy. This causes the direction of the field to be roughly parallel to the surface of the galaxy and perpendicular to the temperature gradient in many locations along the surface of the ISM, a geometry that greatly suppresses thermal conduction. The same magnetic draping can help to suppress Kelvin-Helmholtz (KH) instabilities due to the shear in the flow at the ICM/ISM interface. Figure 2 shows an MHD simulation with an ICM magnetic field and anisotropic thermal conduction. The galaxy retains a corona for  $\sim$ Gyr. Stripped ISM forms a ram pressure tail.

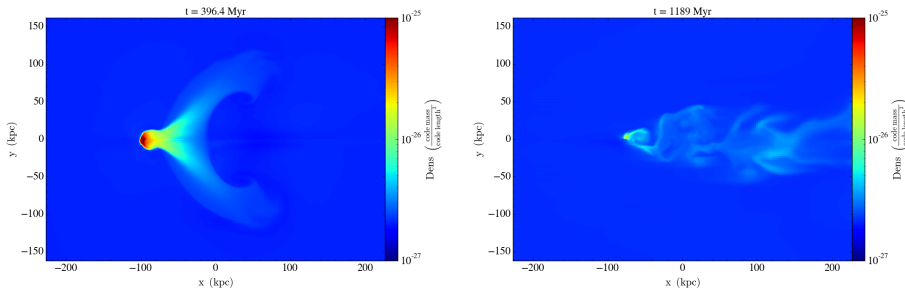

**Figure 2.** Density for the same galaxy as in Fig. 1 in an MHD simulation including magnetic fields and anisotropic thermal conduction at times of 396 Myr (left) and 1.19 Gyr (right). The spherical galaxy retains a corona for  $\sim$ Gyr, and the stripped ISM forms a ram pressure tail.

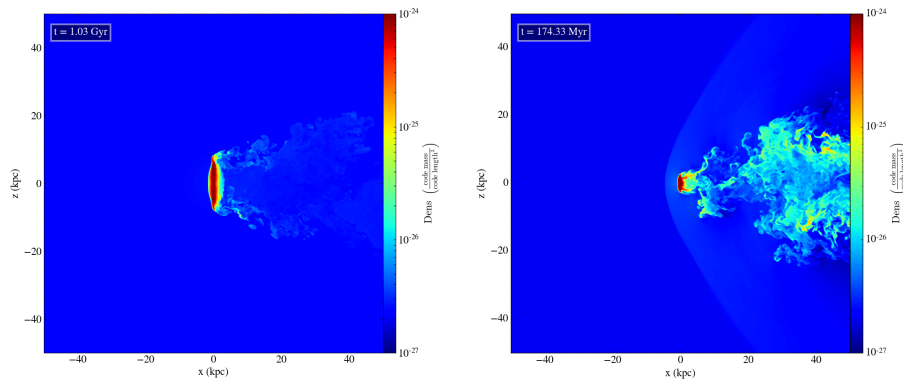

**Figure 3.** left: Density for a spiral galaxy being stripped by subsonic (610 km/s) motion. There is no magnetic field. right: The same model, but with supersonic motion (2000 km/s).

pressure tail, and the overall stripping rate is similar to that for ram pressure alone. This model is much more consistent with observations of large ellipticals in clusters of galaxies. For more details, see Vijayaraghavan & Sarazin (2017a,b).

### 3. Stripping of Spiral Galaxies and Jellyfish Galaxies

Figure 3 shows the density in simulations of the stripping of gas from a disk (e.g., spiral) galaxy for either subsonic (610 km/s) or supersonic (2000 km/s) speeds. These simulations have no magnetic fields or thermal conduction. Of course, higher velocities result in higher ram pressures (proportional to  $v^2$ ), and more rapid stripping. At low speeds, the outer gas in the disk is stripped relatively quickly, but further stripping is a slow process in which gas is gradually peeled from the disk at its outer edge. This results in only a small amount of filamentary gas in the tail. At higher speeds, there is much more material in the tail. However, KH instabilities cause the tail to be filamentary, and it mixes into the ICM fairly quickly.

Magnetic fields of sufficient strength can suppress KH instabilities. Figure 4 shows magnetized simulations of stripping with the same galaxy and velocity as Figure 3 (right). In the left panel, the initial ICM  $\mathbf{B}$  is perpendicular to  $\mathbf{v}$ . This geometry results in the field being amplified around and draping the tail, and is very effective as suppressing KH instabilities. The result is a long, single, coherent tail.

Figure 4(right) shows the case where the initial field is parallel to  $\mathbf{v}$ . The field is not significantly amplified, and is less effective at stabilizing the wake. Although the tail is narrower and more coherent than for the non-magnetic case [Fig. 3 (right)], it is clear that ICM fields which are nearly perpendicular to the galaxy motion are more ideal.

We have derived the mass of gas at various densities and temperatures for the tails in the simulations. In general, the simulations with ICM magnetic fields have more cool, dense gas, with the  $\mathbf{B} \perp \mathbf{v}$  case again being best. This suggests that magnetic fields, particularly perpendicular to the motion, are important for generating tails with optical emission line gas, molecular gas, and in situ star formation. However, the “cool” gas in our simulations is generally hotter than  $2 \times 10^5$  K, and our simulations do not include radiative cooling or star formation. Thus, additional calculations are needed to verify the role of magnetic fields in the formation of cold gas and stars in jellyfish galaxy tails.

For more details on the simulations of stripping from disk galaxies, see Vijayaraghavan & Sarazin (2018).

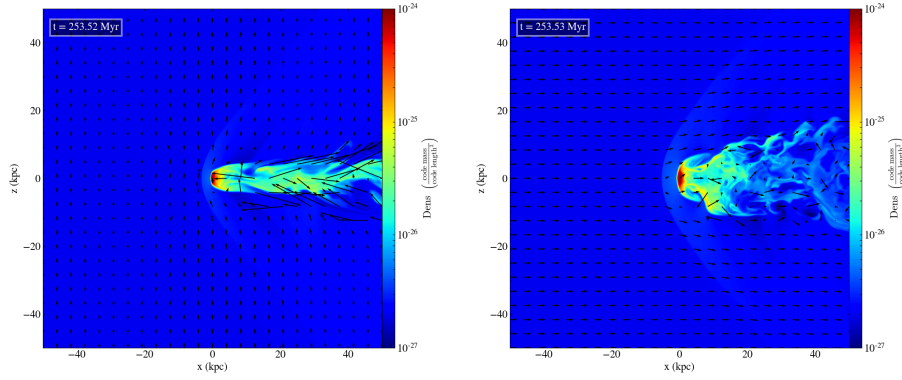

**Figure 4.** Left: The density for the same spiral galaxy as in Figure 3(right), but with an ICM magnetic field initially perpendicular to the motion. Arrows show the direction and strength of  $\mathbf{B}$ . The field drapes the tail and inhibits KH instabilities. Right: The same model, but with the initial magnetic field parallel to the motion. This geometry is less effective at suppressing KH instabilities, and the tail is shorter and less coherent.

#### 4. Conclusions

The results of MHD simulations of the stripping of elliptical and spiral galaxies in clusters were presented. In elliptical galaxies, thermal conduction, if uninhibited, would evaporate their ISM very quickly, in disagreement with the observations of small coronae, and sometimes, stripped tails in large ellipticals in clusters. Magnetic fields drape these galaxies in simulations, and reduce thermal conduction to the level where the stripping rates are similar to those for ram pressure alone.

Low speed (subsonic) stripping of disk galaxies occurs by a relatively gentle peeling of gas from the disk, and does not result in long tails. Combined with the  $v^2$  dependence of ram pressure, this may help to explain why jellyfish galaxies are common in merging clusters, where galaxies from one subcluster fall through gas from another at unusually high speeds.

ICM magnetic fields are required to produce long, coherent tails behind stripped disks, as magnetic forces can suppress KH instabilities. Fields with  $\mathbf{B} \perp \mathbf{v}$  are ideal for this, as the magnetic field is amplified and wraps the tail. The stabilizing effect also depends on the energy density of the field. Thus, the structure and length of tails provide an indirect probe of the strength and geometry of magnetic fields in clusters.

The same magnetic field strengths and geometries lead to larger amounts of relatively cool, dense gas in tails. This may supply material for the formation of cold gas and in situ star formation in tails, as is observed in jellyfish galaxies.

#### References

- Fryxell, B., Olson, K., Ricker, P., et al. 2000, *ApJS*, 131, 273  
 Jaffé, Y. L., Verheijen, M. A. W., Haines, C. P., et al. 2016, *MNRAS*, 461, 1202  
 Sun, M., Donahue, M., Roediger, E., et al. 2010, *ApJ*, 708, 946  
 Sun, M., Jones, C., Forman, W., et al. 2007, *ApJ*, 657, 197  
 Vijayaraghavan, R., & Ricker, P. M. 2015, *MNRAS*, 449, 2312  
 —. 2017, *ApJ*, 841, 38  
 Vijayaraghavan, R., & Sarazin, C. 2017a, *ApJ*, 841, 22  
 —. 2017b, *ApJ*, 848, 63  
 —. 2018, *ApJ*, submitted

# Magnetic fields in simulations of ram pressure stripped galaxies

Mariana Ramos-Martínez<sup>1</sup> and Gilberto C. Gómez<sup>1</sup>

<sup>1</sup> Instituto de Radioastronomía y Astrofísica, UNAM, Apartado Postal 3-72, 58089 Morelia, México  
email: m.ramos@irya.unam.mx

**Abstract.** The removal of the interstellar medium (ISM) of disc galaxies through ram pressure stripping (RPS) has been extensively studied in numerous simulations. Nevertheless, the role of magnetic fields (MF) on the gas dynamics in this process has been hardly studied, although the MF influence on the large-scale disc structure is well established. With this in mind, we present 3D magnetohydrodynamic (MHD) simulations of disc galaxies subject to RPS, with different disc inclinations to study the evolution of the galactic MF and its impact on the gas stripping. When the intracluster medium (ICM) wind hits a galaxy, the gas in the disc is compressed, leading to an enhancement of the MF intensity in the upstream side in our simulations. Since the gas is bound by the MF, we observe that in nearly face-on discs, the gas is swept by the wind in ring-like structures, dragging the field lines with it. In the case of nearly edge-on discs, the field lines are compressed in the upstream side and more extended towards the downstream side. The ICM is magnetized in the downstream side from 0.2 to  $0.7\mu G$ , where nearly face-on discs contribute the most, given that the developed tail is more extended than in nearly edge-on models.

**Keywords.** MHD, galaxies: ISM, galaxies: magnetic fields, galaxies: evolution, methods: numerical.

---

## 1. Introduction

The ram pressure stripping (RPS) is a process in which a galaxy loses its interstellar medium (ISM) through the pressure exerted by the hot intracluster medium (ICM) when the galaxy travels within the cluster. RPS was first proposed by Gunn & Gott (1972) and since then it has been studied in a wide variety of simulations with different methods and techniques (Abadi et al. 1999; Roediger & Brüggen 2006; Vollmer et al. 2006; Tonnesen & Bryan 2009; to name a few). Additionally, several galaxies in clusters have been studied in multiwavelength observations showing that they are good candidates to be experiencing RPS since the galaxies present an asymmetric distribution of gas, that is a truncated gaseous disc and in some cases with tails, while the stellar disc remains unperturbed (e.g. Cayatte et al. 1990; Kenney et al. 2014; Jáchym et al. 2014; Poggianti et al. 2016 and many more).

However, despite the huge variety of RPS models and simulations, the role of the magnetic fields (MF) in the gas dynamics has been hardly explored in this process, although the large-scale disc structure of the MF is well established (Beck 2005; Beck & Wielebinski 2013 and references therein). Some examples of magnetohydrodynamics (MHD) models were carried out by Ruszkowski et al. (2014), where they presented simulations of RPS with a magnetized ICM and found that the MF can affect the morphology of the stripped gas tail, since they observed narrower tails than in purely hydrodynamic (HD) simulations. Pfrommer & Dursi (2010) also showed MHD simulations in which the galaxies are moving in a magnetized ICM. The galaxies in their simulations swept the field lines

where polarized radiation is generated. This is used to map the orientation of the MF in clusters, e.g. Virgo cluster. In these cases, the MF has been implemented only in the ICM and not in the discs. Another case with galactic MF only was performed by Tonnesen & Stone (2014), and they found that MFs do not dramatically change the stripping rate of the gas disc compared to pure HD simulations. Nevertheless, the MF inhibits the mixing of the gas tail with the ICM. Here we present MHD simulations of disc galaxies subject to RPS under the wind-tunnel approximation for different disc inclinations.

## 2. Model

We performed 3D MHD simulations using the adaptive mesh refinement (AMR) code RAMSES (Teyssier 2002). The gas in the galaxy is set up in rotational equilibrium in a fixed gravitational potential and its density distribution is obtained assuming magnetohydrostatic equilibrium (Gómez & Cox 2002; Ramos-Martínez et al. 2018). The MF has two regimes, in the central region (the bulge) of the galaxy the MF has a random orientation, while in the disc it is azimuthal.

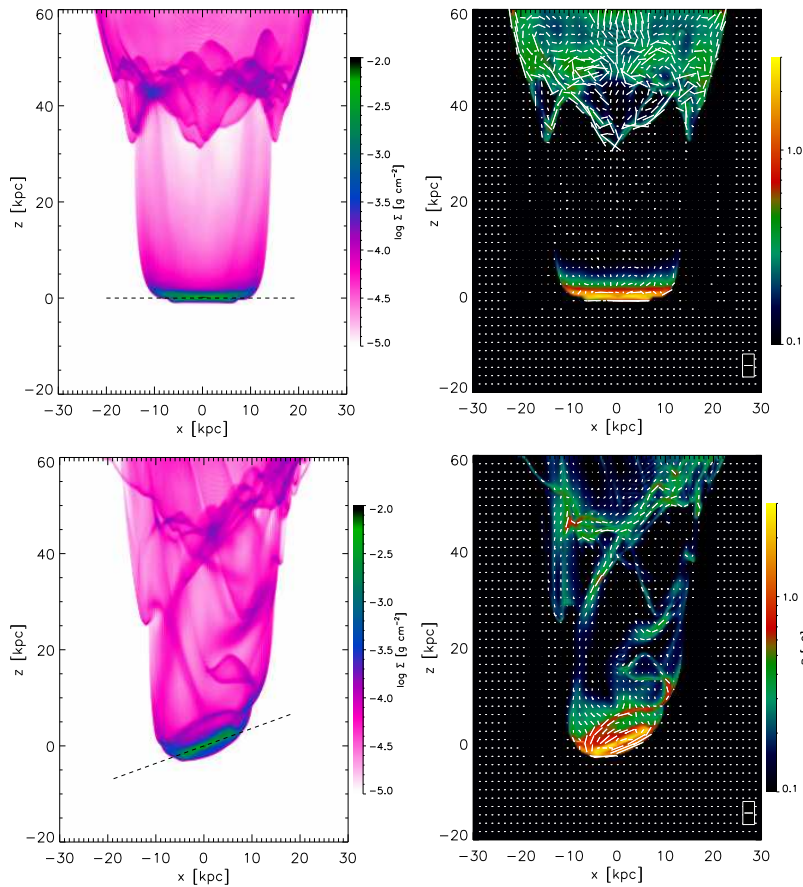

**Figure 1.** Surface density of the gas (*left*) and magnetic field strength (*right*) for Mod1 (*top*) and Mod2 (*bottom*), projected along the  $y$ -axis, both in log-scale at  $t = 900$  Myr. The dashed line indicates the original radius of the disc (20 kpc).

The ICM is modeled as a wind and the disc is at rest, simulating the falling of the



galaxy towards a cluster center, that is, the wind-tunnel approximation. The ICM-wind has a constant density with  $n_{\text{ICM}} = 10^{-5} \text{ cm}^{-3}$  and a velocity profile that increases linearly in time from  $300 \text{ km s}^{-1}$  at  $t = 0$  to  $1000 \text{ km s}^{-1}$  in 700 Myr. Additionally, we present four models with different galaxy inclinations with respect to the wind direction. In Mod1 the disc plane is parallel to the  $z = 0$  plane, while in Mod2 it is inclined  $20^\circ$  with respect to  $z = 0$ . In both cases the wind flows up from the bottom of the box (in the  $+z$ -direction), that is the interaction with the discs is (nearly) face-on. In Mod3 and 4, the wind flows from left to right ( $+x$ -direction), which represents (nearly) edge-on interactions, but Mod3 is a disc inclined  $20^\circ$  with respect to  $z = 0$  plane and in Mod4 the disc plane lies in  $z = 0$ .

### 3. Evolution of the magnetic field

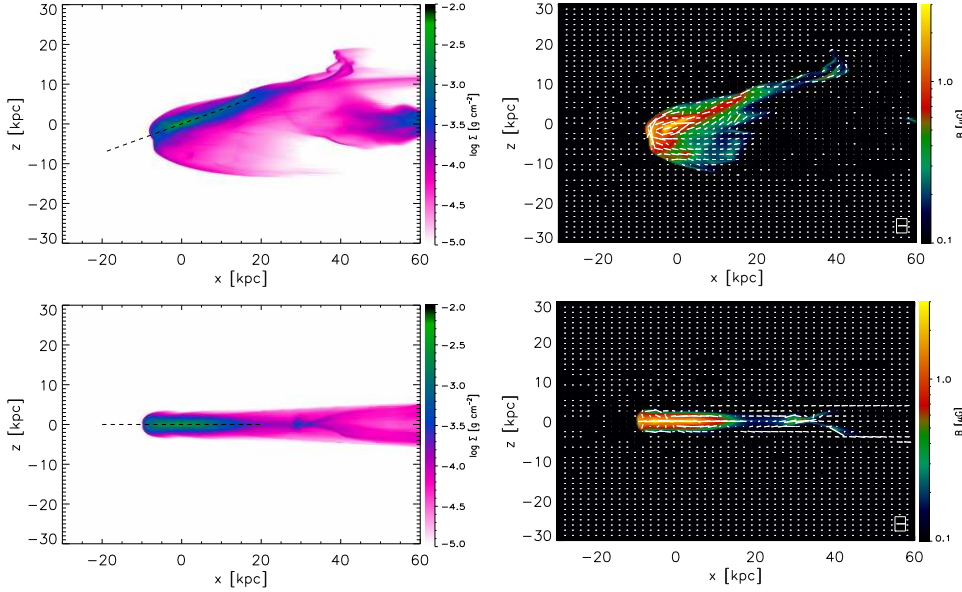

**Figure 2.** Surface density of the gas (*left*) and magnetic field strength (*right*) for Mod3 (*top* at  $t = 570$  Myr) and Mod4 (*bottom* at  $t = 900$  Myr), projected along the  $y$ -axis, both in log-scale. The dashed line indicates the original radius of the disc (20 kpc).

When the ICM-wind is switched on and hits the galaxy, the compression exerted by the wind enhances the MF strength in all the models a factor of  $\sim 3$  in the shock front. Depending on the geometry of the model, the shocked layer of gas can be present at all radii, as in Mod1 or partially in the disc (Mod2, 3 and 4).

The wind keeps flowing and accelerating, so that it surpasses the gravitational potential of the galaxy and starts to remove the material from the outskirts ( $10 \text{ kpc} < r < 20 \text{ kpc}$ ) where a tail of gas appears in the downstream side. In the cases Mod1 and 2, since the interaction with the wind is (nearly) face-on, the gas is swept from the galaxy in ring-like structures. At  $t > 500$  Myr, since the magnetic field is dragged with the gas, it helps to magnetize the downstream side of the tail up to  $z \sim 20 \text{ kpc}$  with a strength of  $B \approx 0.4 - 0.7 \mu\text{G}$ . At  $t > 900$  Myr, in Mod1 and 2, the wind moves the rings of gas above and farther away of the galaxy, showing tails of at least 60 kpc in length (fig. 1). Due to the interaction with the accelerated wind, the rings are distorted in the vertical ( $z$ ) direction giving a filamentary structure to the tail, where the MF is aligned with

these filaments (fig. 1), similar to the results obtained by Ruszkowski et al. (2014). The filaments are the densest structures of the tail ( $\sim 10^{-3.6} \text{ g cm}^{-2}$ ), with MF values ranging from  $B \approx 0.3 - 0.4 \mu\text{G}$  to  $0.7 \mu\text{G}$ . At intermediate heights of the tails ( $z = 15 - 30 \text{ kpc}$ ) the field strength drops to  $\lesssim 0.2 \mu\text{G}$  since less gas is swept from the disc and the surface density also decreases.

On the other hand, Mod3 and 4 do not present a very extended tail at  $t \geq 500 \text{ Myr}$  as can be observed in an edge-on view of the galaxies ( $xz$ -plane, fig. 2). Instead the gas disc shows asymmetries compared to the initial density distribution, being spread out to  $x \sim 20 - 40 \text{ kpc}$  but with low densities ( $< 10^{-4.5} \text{ g cm}^{-2}$ ) and truncated for  $x < 0$ . Additionally, the MF intensity increases a factor of  $\sim 2 - 3$  ( $B \approx 1.5 - 3 \mu\text{G}$ ) in the upstream side of the interaction ( $-10 \text{ kpc} < x < 0$ ) while in downstream side ( $x = 0 - 20 \text{ kpc}$ ) it shows no dramatic changes, that is  $B \approx 0.8 - 1 \mu\text{G}$ . Even at  $t > 900 \text{ Myr}$ , Mod4 did not develop a very prominent or extended tail that is poorly magnetized with  $B \lesssim 0.2 - 0.3 \mu\text{G}$  ( $x = 20 - 60 \text{ kpc}$  in fig. 2), compared to the (nearly) face-on models (Mod1 and 2). Also, in Mod3 and 4 the MF lines resemble a water fountain, that is they have a concave shape in the upstream side and wrap around the disc at higher  $|z|$  (fig. 2), since the wind flows parallel or nearly to the plane of the disc and sweeps the gas above and below the galaxy more easily than the gas closer to the galactic plane.

At the end of the simulations, in all models we have a remnant disc with size of  $r \lesssim 10 \text{ kpc}$  where the MF shows an enhancement by a factor of  $\sim 2 - 3$  from  $B(t = 0) \approx 0.8 - 1 \mu\text{G}$  to  $B \approx 2.5 \mu\text{G}$  for  $t > 500 \text{ Myr}$  in the disc. In the downstream side of the interaction, the tails can magnetize the environment from  $B \sim 0.2 - 0.7 \mu\text{G}$  and also the distribution of the MF lines changes depending on the disc inclination with respect to the wind.

## References

- Abadi, M. G., Moore, B. & Bower, R. G. 1999, *MNRAS*, 308, 947
- Beck, R. 2005 in: K. T. Chyży, K. Otmianowska-Mazur, M. Soida & R.-J. Dettmar (eds.), *The magnetized plasma in galaxy evolution*, Proc. Conf. Held in Krakow, Poland, p. 193
- Beck, R. & Wielebinski, R. 2013 in: G. Gilmore(ed.), *Planets, Stars and Stellar Systems*, Vol. 5 (Springer-Verlag, Berlin), p. 641
- Cayatte, V., van Gorkom, J. H., Balkowski, C. & Kotanyi, C. 1990, *AJ*, 100, 604
- Gómez, G. C. & Cox, D. 2002, *ApJ*, 580, 235
- Gunn, J. E. & Gott, J. R. I. 1972, *ApJ*, 176, 1
- Jáchym, P., Combes, F., Cortese, L., Sun, M. & Kenney, J. D. P. 2014, *ApJ*, 792, 11
- Kenney, J. D. P., Geha, M., Jáchym, P., Crowl, H. H., Dague, W., Chung, A., van Gorkom, J. & Vollmer, B. 2014, *ApJ*, 780, 119
- Pfrommer, C. & Dursi, J. 2010, *Nature Physics*, 6, 520
- Poggianti, B. M., Fasano, G., Omizzolo, A., Gullieuszik, M., Bettoni, D., Moretti, A., Paccagnella, A., Jaffé Y. L., Vulcani, B., Fritz, J, Couch W. & D'Onofrio, M. 2016, *AJ*, 151, 78P
- Ramos-Martínez, M., Gómez, G. C. & Pérez-Villegas, A. 2018, *MNRAS*, 476, 3781
- Roediger, E. & Brüggén, M., 2006, *MNRAS*, 369, 567
- Ruszkowski, M., Brüggén, M., Lee, D. & Shin, M. S. 2014, *ApJ*, 784, 75
- Teyssier, R. 2002, *A&A*, 385, 337
- Tonnesen, S. & Bryan, G. L. 2009, *ApJ*, 694, 789
- Tonnesen, S. & Stone, J. 2014, *ApJ*, 795, 148
- Vollmer, B., Soida, M., Otmianowska-Mazur, K., Kenney, J. D., van Gorkom, J. H. & Beck, R. 2006, *A&A*, 453, 883

# Statistical properties of Faraday rotation measure from large-scale magnetic fields in intervening disc galaxies

Aritra Basu,<sup>1,2</sup> S. A. Mao,<sup>2</sup> Andrew Fletcher,<sup>3</sup> Nissim Kanekar,<sup>4</sup>  
Anvar Shukurov,<sup>3</sup> Dominic Schnitzeler,<sup>2</sup> Valentina Vacca<sup>5</sup> and Henrik  
Junklewitz<sup>6</sup>

<sup>1</sup>Fakultät für Physik, Universität Bielefeld, Postfach 100131, 33501 Bielefeld, Germany

<sup>2</sup>Max-Planck-Institut für Radioastronomie, Auf dem Hügel 69, D-53121 Bonn, Germany  
email: aritra@physik.uni-bielefeld.de

<sup>3</sup>School of Mathematics and Statistics, Newcastle University,  
Newcastle-upon-Tyne, NE13 7RU, UK

<sup>4</sup>National Centre for Radio Astrophysics, TIFR, Post Bag 3, Ganeshkhind,  
Pune 411007, India

<sup>5</sup>INAF-Osservatorio Astronomico di Cagliari, Via della Scienza 5,  
I-09047 Selargius (CA), Italy

<sup>6</sup>Argelander Institut für Astronomie, Universität Bonn, Auf dem Hügel 71,  
53121 Bonn, Germany

**Abstract.** To constrain the large-scale magnetic field strengths in cosmologically distant galaxies, we derive the probability distribution function of Faraday rotation measure (RM) when random lines of sight pass through a sample of disc galaxies, with axisymmetric large-scale magnetic fields. We find that the width of the RM distribution of the galaxy sample is directly related to the mean large-scale field strength of the galaxy population, provided the dispersion within the sample is lower than the mean value. In the absence of additional constraints on parameters describing the magneto-ionic medium of the intervening galaxies, and in the situation where RMs produced in the intervening galaxies have already been statistically isolated from other RM contributions along the lines of sight, our simple model of the magneto-ionic medium in disc galaxies suggests that the mean large-scale magnetic field of the population can be measured to within  $\sim 50\%$  accuracy.

**Keywords.** methods: analytical – methods: statistical – ISM: magnetic fields

---

## 1. Introduction

The cosmic evolution of magnetic fields on scales  $\gtrsim 1$  kpc remains an open question in observational astronomy. In order to constrain cosmic evolution of large-scale magnetic fields in galaxies, it is crucial to measure their redshift evolution. Due to the faintness of distant galaxies, it is a challenging proposition to measure magnetic fields directly through their polarized synchrotron emission. A powerful tool to probe magnetic fields in distant galaxies is provided by statistical studies of the Faraday rotation measure (RM) of quasar absorption line systems, which are tracers of galaxies in the high redshift Universe. The distribution of RM of two quasar samples, with and without absorption line systems, can be statistically compared to infer the properties of magnetic fields in the intervening galaxy population (e.g., Oren & Wolfe 1995; Bernet et al. 2008; Joshi & Chand 2013; Farnes et al. 2014). The sample of quasars with intervening galaxies is

referred to as the ‘target’ sample and the sample without intervening galaxies is called the ‘control’ sample.

Part of the RM measured towards a quasar which has an intervening galaxy arises from the quasar itself ( $\text{RM}_{\text{qso}}$ ), the intergalactic medium (IGM;  $\text{RM}_{\text{IGM}}$ ) and interstellar medium of the Milky Way ( $\text{RM}_{\text{MW}}$ ). Thus, the net RM ( $\text{RM}_{\text{t}}$ ) measured in the observer’s frame for a single line of sight in the target sample is given by,

$$\text{RM}_{\text{t}} = \frac{\text{RM}_{\text{gal}}}{(1 + z_{\text{gal}})^2} + \text{RM}'_{\text{qso}}, \quad (1.1)$$

where  $\text{RM}_{\text{gal}}$  is the RM contribution from the intervening galaxy and  $z_{\text{gal}}$  is its redshift.  $\text{RM}'_{\text{qso}}$  contains RM contributions from rest of the line of sight and is given by  $\text{RM}'_{\text{qso}} = \text{RM}_{\text{qso}} (1 + z_{\text{qso}})^{-2} + \text{RM}_{\text{IGM}} + \text{RM}_{\text{MW}} + \delta_{\text{RM}}$ . Here,  $\delta_{\text{RM}}$  is the measurement noise and  $z_{\text{qso}}$  is the redshift of the background quasar.

Similarly, for a line of sight in the control sample, the net RM ( $\text{RM}_{\text{c}}$ ) in the observer’s frame is given by,

$$\text{RM}_{\text{c}} = \frac{\text{RM}_{\text{qso,c}}}{(1 + z_{\text{qso,c}})^2} + \text{RM}_{\text{IGM,c}} + \text{RM}_{\text{MW,c}} + \delta_{\text{RM,c}}, \quad (1.2)$$

where the subscript ‘c’ refers to the control sample.

If quasars in the target and the control samples are chosen such that  $\text{RM}'_{\text{qso}}$  and  $\text{RM}_{\text{qso,c}}$  have the same statistical properties, then statistical comparison between the distributions of  $\text{RM}_{\text{t}}$  and  $\text{RM}_{\text{c}}$  can yield the excess contribution from  $\text{RM}_{\text{gal}} (1 + z_{\text{gal}})^{-2}$ . Most of the previous studies where this method is used have attributed statistical differences to turbulent magnetic fields, with the field strengths computed assuming Gaussian statistics for  $\text{RM}_{\text{t}}$  and  $\text{RM}_{\text{c}}$  (e.g., Bernet et al. 2008; Bernet et al. 2013).

Here we investigate the effects of large-scale magnetic fields in the intervening galaxies on the distribution of RM. First, we derive the probability distribution function (PDF) of  $\text{RM}_{\text{gal}}$  analytically for a single galaxy. Then, we consider the statistical distribution of  $\text{RM}_{\text{gal}}$  for an ensemble of galaxies. A detailed treatment can be found in Basu et al. (2018).

## 2. Magneto-ionic medium in intervening galaxy population

To derive the PDF of  $\text{RM}_{\text{gal}}$  analytically, we have adopted a simple set of assumptions for the magneto-ionic medium in the intervening galaxies: (i) the large-scale magnetic fields in each galactic disc have axisymmetric geometry with magnetic pitch angle  $p$ , (ii) both the large-scale magnetic field strength ( $B$ ) and the free electron density ( $n_e$ ) decrease exponentially with radius  $r$ , (iii) the magnitude and geometry of both magnetic field and electron density do not vary with height from the mid-plane, (iv) the RM contributed by turbulent magnetic fields in the intervening galaxies is insignificant within the three-dimensional illumination beam passing through the galaxies, and (v) the RM contributed by the background quasar has been statistically isolated from  $\text{RM}_{\text{t}}$ .

Under these assumptions, the RM for each line of sight is given as (see Berkhuijsen et al. 1997; Basu et al. 2018),

$$\text{RM}_{\text{gal}} = -0.81 n_0 B_0 e^{-r/r'_0} \cos(\theta - p) h_{\text{ion}} \tan i. \quad (2.1)$$

Here,  $n_0$  and  $B_0$  are the free electron density and the strength of the axisymmetric large-scale magnetic field at the galactic centre,  $\theta$  is the azimuthal angle,  $h_{\text{ion}}$  is the thickness of the ionized disc,  $i$  is the inclination angle of the galactic disc with respect to the plane of the sky and  $r'_0$  is the radial scale-length of the product  $n_e(r) B(r)$ .

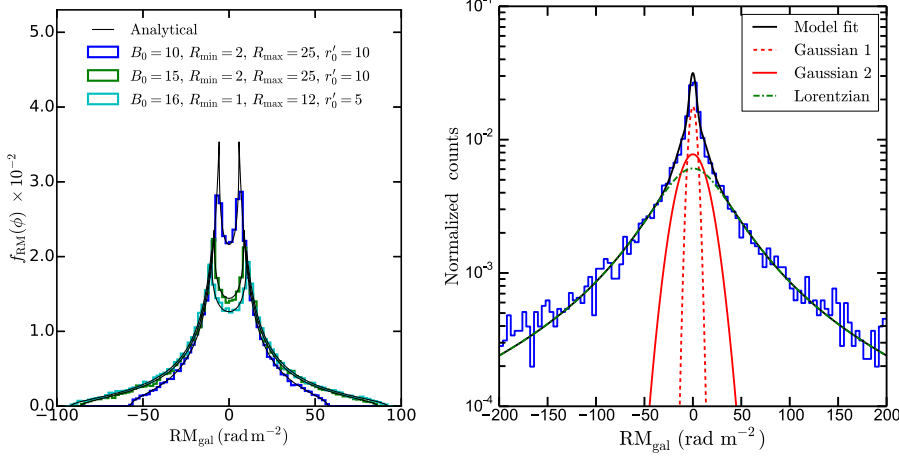

**Figure 1.** *Left:* Distribution of  $\text{RM}_{\text{gal}}$  for a single galaxy inclined at  $30^\circ$ . The black curves are the analytical PDF given by Eq. (3.1). *Right:* Distribution of  $\text{RM}_{\text{gal}}$  for a sample of 10000 galaxies.  $B_0$  and  $n_0$  of the population have Gaussian distributions with  $\langle B_0 \rangle = 15 \mu\text{G}$ ,  $\langle n_0 \rangle = 0.03 \text{ cm}^{-3}$ ,  $\sigma_{B_0} = 5 \mu\text{G}$  and  $\sigma_{n_e} = 0.01 \text{ cm}^{-3}$ . The distribution is modelled as a sum of one Lorentzian and two Gaussians, which are shown as the different lines.

For an ensemble of intervening galaxies, the quasar sightlines can intersect each galaxy at any radius, inclination angle, and azimuthal angle. For galaxies in the target sample, we assume the galactic discs to be inclined uniformly with  $i$  in the range  $0$  to  $90^\circ$ . The angle  $\theta$  is distributed uniformly between  $0$  and  $360^\circ$ . Since it is plausible that the currently available data base of absorption line samples is incomplete in terms of range of radii probed by the background quasars (Basu et al. 2018), we assume that the impact radii are distributed uniformly in the range  $R_{\text{min}}$  to  $R_{\text{max}}$ .

### 3. PDF of RM of intervening galaxy population

Under the assumptions mentioned above, the PDF of  $\text{RM}_{\text{gal}}$ ,  $f_{\text{RM}}(\phi)$ , for a single galaxy has the following analytical form:

$$f_{\text{RM}}(\phi) = \begin{cases} \frac{r'_0}{\pi (R_{\text{max}} - R_{\text{min}})} \frac{1}{|\phi|} \left[ \arcsin\left(\frac{|\phi|}{a'}\right) - \arcsin\left(\frac{|\phi|}{b'}\right) \right], & -a' \leq \phi \leq a', \\ \frac{r'_0}{\pi (R_{\text{max}} - R_{\text{min}})} \frac{1}{|\phi|} \arccos\left(\frac{|\phi|}{b'}\right), & \phi \in [-b', -a'] \cup (a', b']. \end{cases} \quad (3.1)$$

Here,  $a' = 0.81 n_0 B_0 h_{\text{ion}} \tan i e^{-R_{\text{max}}/r'_0}$  and  $b' = 0.81 n_0 B_0 h_{\text{ion}} \tan i e^{-R_{\text{min}}/r'_0}$ . The left-hand panel of Fig. 1 shows the analytical PDF of  $\text{RM}_{\text{gal}}$  for a single galaxy with  $i = 30^\circ$  (black curve) and, for comparison, the simulated distribution for 10000 lines of sight as histograms.

The right-hand panel of Fig. 1 shows a simulated PDF of  $\text{RM}_{\text{gal}}$  for a sample of 10000 intervening disc galaxies, where we have assumed Gaussian distributions for  $B_0$  (with mean  $\langle B_0 \rangle$  and standard deviation  $\sigma_{B_0}$ ) and  $n_0$  (with mean  $\langle n_0 \rangle$  and standard deviation  $\sigma_{n_e}$ ) within the population. We find that the distribution of  $\text{RM}_{\text{gal}}$  can be accurately approximated by the sum of one Lorentzian and two Gaussian components as shown in the right panel of Fig. 1. From Eq. (3.1) and Fig. 1 (left panel), we find that the width of the PDF of  $\text{RM}_{\text{gal}}$  for a single galaxy depends on the parameters  $a'$  and  $b'$  and, therefore, on  $B_0$ . Thus, we expect the width  $w$  of the Lorentzian component to be related to  $\langle B_0 \rangle$

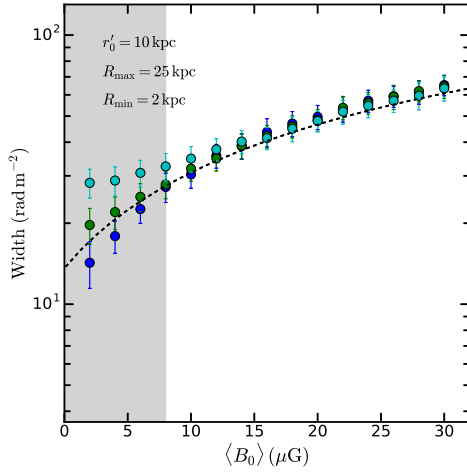

**Figure 2.** Variation of the width of the Lorentzian component of the distribution of  $\text{RM}_{\text{gal}}$  in the target sample as a function of  $\langle B_0 \rangle$ . Blue, green and cyan symbols are for  $\sigma_{B_0} = 2, 5$  and  $10 \mu\text{G}$ . The dashed line is the best-fit model given by Eq. (3.2). The shaded region roughly represents the region where  $\langle B_0 \rangle \lesssim \sigma_{B_0}$  and the points within were excluded from the fitting.

for a sample of intervening galaxies. In Fig. 2, we show the variation of  $w$  with  $\langle B_0 \rangle$  for various choices of  $\sigma_{B_0}$ . In the regime  $B_0 \gtrsim \sigma_{B_0}$  (the un-shaded area in Fig. 2), the variation of  $w$  is approximated by,

$$w(\langle B_0 \rangle) = 13.6 + 1.8 \langle B_0 \rangle - 0.0076 \langle B_0 \rangle^2, \quad (3.2)$$

with  $\langle B_0 \rangle$  in  $\mu\text{G}$  and  $w$  in  $\text{rad m}^{-2}$ , and is shown as the dashed line in Fig. 2. Thus,  $w$  can be used to determine the mean strength of the large-scale magnetic field in a sample of intervening galaxies.

#### 4. Conclusion

Our study suggests that the distribution of  $\text{RM}_{\text{gal}}$  due to axisymmetric large-scale magnetic fields in intervening disc galaxies is non-Gaussian and that the distribution can be empirically modelled as the sum of one Lorentzian and two Gaussian components. The width of the Lorentzian component can be used to estimate the mean large-scale magnetic field strength in a population of intervening galaxies using Eq. (3.2) derived for typical values of the physical parameters, such as,  $h_{\text{ion}} = 500 \text{ pc}$ ,  $R_{\text{min}} = 2 \text{ kpc}$ ,  $R_{\text{max}} = 25 \text{ kpc}$  and  $r'_0 = 10 \text{ kpc}$ . The  $\langle B_0 \rangle$  estimated using Eq. (3.2) lies within  $\sim 50\%$  of the true value in the absence of additional constraints on the physical parameters.

#### References

- Basu A., Mao S. A., Fletcher A., Kanekar N., Shukurov A., Schnitzeler D., Vacca V., Junklewitz H., 2018, *MNRAS*, 477, 2528
- Berkhuijsen E. M., Horellou C., Krause M., Neinger N., Poezd A. D., Shukurov A., Sokoloff D. D., 1997, *A&A*, 318, 700
- Bernet M., Miniati F., Lilly S., Kronberg P., Dessauges-Zavadsky M., 2008, *Nature*, 454, 302
- Bernet M. L., Miniati F., Lilly S. J., 2013, *ApJ*, 772, L28
- Farnes J. S., O’Sullivan S. P., Corrigan M. E., Gaensler B. M., 2014, *ApJ*, 795, 63
- Joshi R., Chand H., 2013, *MNRAS*, 434, 3566
- Oren A. L., Wolfe A. M., 1995, *ApJ*, 445, 624

# Optimizing Faraday Background Grids

Lawrence Rudnick<sup>1</sup>

Minnesota Institute for Astrophysics, University of Minnesota, 116 Church St. SE,  
 Minneapolis, MN 55455 USA email: [larry@umn.edu](mailto:larry@umn.edu)

**Abstract.** Magnetic field strengths in objects ranging from HII regions to cosmological large scale structure can be estimated using dense grids of Rotation Measures (RMs) from polarized background radio structures. Upcoming surveys on the SKA and its precursors will dramatically increase the number  $N$  of background sources. However, detectable magnetic field strengths will scale only as  $t^{-0.15}$ , for an integration time  $t$  on a fixed area of sky, so the analysis techniques need to be optimized. A key factor is the difference in the dispersion of intrinsic RMs for different populations, which must be carefully accounted for to achieve the scientifically needed accuracies.

**Keywords.** magnetic fields, polarization, methods: numerical methods: statistical

## 1. Introduction

The next generation of radio surveys, including the SKA and its precursors, will dramatically increase the number of detected distant polarized sources. When these sources are viewed through a foreground magnetized plasma, whether it is from an HII region, a galaxy, or cluster of galaxies, or even large scale structure, Faraday effects in that plasma offer a way to explore its magnetic field strength and structure (Johnston-Hollit et al. 2014). Akahori, Gaensler & Ryu (2014) describes the many contributions to the observed rotation measures (RMs), from which the effects of the intervenor must be isolated. The accuracy with which this can be done, as detailed below, depends on the number of background sources and the scatter in their RMs.

Increasing the number of polarized sources is expensive, as seen in Figure 1, since the cumulative number increases only as  $P_{det}^{-0.6}$  where  $P_{det}$  is the detection limit. This requires that we optimize our techniques for using the limited number of sources that we have; one aspect of that optimization is discussed here.

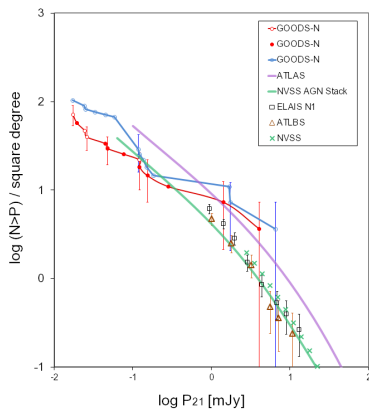

**Figure 1.** Cumulative polarization counts. Adapted from Rudnick & Owen (2014).

## 2. Optimizing the figure of merit

In background grid experiments we measure the difference in the variance of RMs seen through a foreground screen to those of a control sample. The sensitivity thus depends on the intrinsic RM variance of individual background sources (the smaller the better), and the number that are available behind the screen (the more the better).

Any such experiment will have multiple populations of background sources. If sources of type  $j$  have individual values of  $RM_{j,i}$ , a sky density of  $n_j$  /steradian, and our foreground object of interest covers  $\Omega$  steradians, then we have  $N_j = n_j\Omega$  sources. The population will have a variance in RM,  $\sigma_j^2$ , and a corresponding uncertainty, of

$$\sigma_j^2 = \langle RM_{j,i}^2 \rangle - \langle RM_{j,i} \rangle^2 \quad \text{and} \quad \delta_j \approx \sqrt{\frac{2}{N_j}} \sigma_j \frac{\text{rad}^2}{m^4}$$

for a Gaussian distribution of  $N_j$  sources (Lehman & Casella 1998).  $\delta_j$  is the error in  $\sigma_j^2$ , the figure of merit that we would like to minimize. It is important to note, and not generally recognized, that this leads to a minimum magnetic field which scales only as  $P_{det}^{0.3}$  or an integration time of  $t^{-0.15}$  for observations of a single area on the sky. This general behavior applies whether one is using  $F$ -tests or Bayesian statistics, or Monte-Carlo type modeling, etc.

As an example, consider two populations,  $a$  and  $b$ , with different values of  $\sigma_a^2$  and  $\sigma_b^2$ , and the same sample sizes,  $N$ . The default procedure is just to average them. Then

$$\sigma_{tot,unwtd}^2 = 0.5 * (\sigma_a^2 + \sigma_b^2) \quad \text{and} \quad \delta_{tot,unwtd} = 0.5 * (\sqrt{\delta_a^2 + \delta_b^2})$$

. However, if we were to weight by the inverse variances of the two populations, then

$$\sigma_{tot,wtd}^2 = \left( \frac{\sigma_a^2}{\delta_a^2} + \frac{\sigma_b^2}{\delta_b^2} \right) / \left( \frac{1}{\delta_a^2} + \frac{1}{\delta_b^2} \right) \quad \text{and} \quad \delta_{tot,wtd} = \frac{1}{\sqrt{\left( \frac{1}{\delta_a^2} + \frac{1}{\delta_b^2} \right)}}$$

To illustrate the difference, assume that  $\delta_b = 10\delta_a$ , and that the numbers of sources are the same ( $N$ ) in the two populations, so  $\sigma_0 \equiv \sigma_b = \sqrt{10} \sigma_a$ . As we will see below, such differences in RM variations between different populations are common. Now,

$$\delta_{tot,unwtd} = 2.3\sigma_0^2/\sqrt{N} \quad \text{and} \quad \delta_{tot,wtd} = 0.48\sigma_0^2/\sqrt{N}$$

Weighting improves the accuracy of the variance by a factor of over 4 in this case. In Figure 2 we show the results of this type of experiment, varying  $N$  and varying the ratio of  $\frac{\sigma_b}{\sigma_a}$ . The  $\frac{1}{\sqrt{N}}$  behavior is seen on the left. On the right, we see that when the two population variances are equal, one gets an *improvement* by a factor of  $\sqrt{2}$ , as expected. But as  $\sigma_b$  rises, even though we are adding more sources, the uncertainty in the unweighted variance goes up. Weighting is critical! This calculation should be redone both for verification and to put in realistic models of the distributions of RMs in different populations, since they are quite unlikely to have Gaussian distributions.

## 3. Populations and variances

Which source properties will lead to different RM variances? *All of them!*

Galactic location (and especially) latitude is the first major factor. Rotation measures and the scatter among them increase strongly at low galactic latitudes and in the direction of some local Faraday structures. For studies of individual objects, this means that control samples must be done in close proximity to the foreground screen of interest. For studies



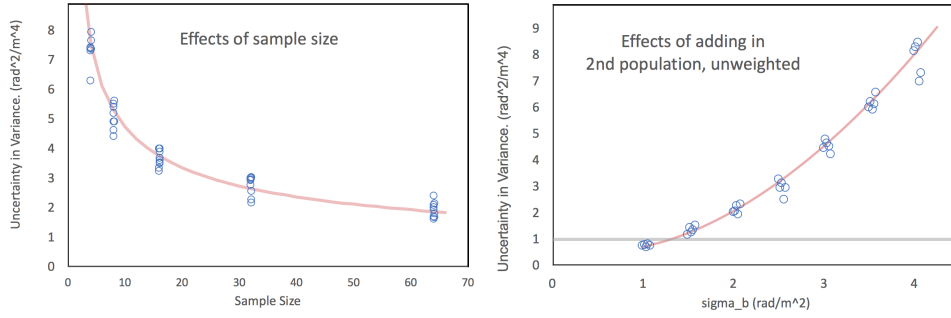

**Figure 2.** Uncertainty in **variance** for background experiments. Left: Varying the number of sources in each population. Right: **Unweighted** analysis as a function of rms scatter of 2nd population (1st population = 1).

of large samples, the different variances due to screens and background sources at different galactic locations must be properly weighted.

The nature of the optical host leads to very different polarization properties. O’Sullivan et al. (2017) found large differences in the fractional polarizations of radiative-mode and jet-mode AGN, which could be related to Faraday differences (see below).

The spectral index of the background radio source influences its polarization properties. Farnes et al. (2014) shows that the “(fractional) polarization spectral index”, differs for flat and steep spectrum sources. Negative slopes indicate depolarization, i.e., fractional polarization decreasing with increasing wavelength. Often, depolarization will be accompanied by a variation in RM as a function of wavelength. This variation will increase the intrinsic variance in RM within the population. When the polarization spectral index is positive, i.e., the source “re-polarizes” at longer wavelengths; then there will always be a variation of RM with wavelength, and thus an increased RM variance.

### 3.1. Fractional Polarization

The integrated fractional polarization of a radio source primarily depends on two factors, *i*) variations of the magnetic field direction within the synchrotron emitting source, and *ii*) variations in the Faraday depth either within or across the observed structure of the source. *i*) does not lead to any particular RM behavior, while *ii*) will create strong correlations between fractional polarization and depolarization. Initial indications are that both of these can be important. So fractional polarization is an imperfect indicator of RM variations – a very high fractional polarization implies small RM variations, while a low fractional polarization could be due to either effect. Figure 3 shows the relationship

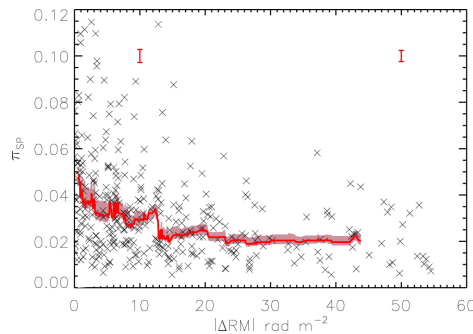

**Figure 3.** Relation between RM variations and fractional polarization, Lamee et al. (2016).

between RM variations and fractional polarizations of sources selected from the S-PASS survey (Lamee et al. 2016).  $\Delta RM$  is the difference between RMs measured between a) 1365 MHz and 1435 MHz from the NVSS survey and b) between 1400 MHz and 2300 MHz from the NVSS and S-PASS surveys. As long as  $\Delta RM \neq 0$ , this will result in an extra contribution to the RM variations in a population. The correlation between fractional polarization and  $\Delta RM$  shows that low polarization sources are much more likely to have large RM population variances.

Fractional polarization itself is a strong function of both the angular and physical size of the source (work in progress) as well as the total intensity. While this doesn't guarantee that RM variances will depend on these quantities, correcting for any dependencies on size and intensity are likely to be critical.

### 3.2. Morphology

There is also a strong relation between source morphology and the strength of RM variations across the source, although this has not been systematically investigated to our knowledge. An initial look at this issue has been made by M. Wieber (Minnesota), based on samples of large angular size sources assembled by H. Andernach (Guanajuato) and S. O'Sullivan (Hamburg). These sources are resolved in NVSS, and polarization maps in the two NVSS bands provided by J. Stil (Calgary) were used to characterize  $\sigma_{RM}$ , the variation in RM across the face of the source. Representative groups of the lowest  $\sigma_{RM}$  sources and the highest ones are shown in Figure 4. Color coding has been used to guide the eye, but it is clear that sources with larger values of  $\sigma_{RM}$  are more likely to show structures with bends and other distortions. This relationship is not surprising, given that the distorted sources are interacting with a substantial external thermal medium, with the higher densities (and perhaps fields) leading to higher RMs.

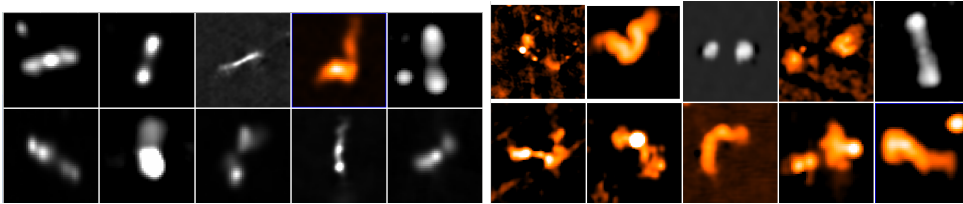

**Figure 4.** The NVSS structure of low (left) and high (right)  $\sigma_{RM}$  sources.

## 4. Conclusions

For studies of magnetic fields in foreground screens, using populations of polarized background sources, it is critical to measure the intrinsic variations in the RM distributions of each background population, and properly weight them in the analysis. *This work is supported, in part, by U.S. NSF grant AST17-14205 to the University of Minnesota.*

## References

- Akahori, T., Gaensler, B. & Ryu, D., 2014, *ApJ* 790, 123  
 Farnes, J., Gaensler, B. & Carretti, E., 2014, *ApJSS* 212, 15  
 Johnston-Hollit, M. et al. 2014, *POS-AASKA14*, <https://pos.sissa.it/215/092/pdf>  
 Lamee, M., Rudnick, L., Farnes, J. S., Carretti, E., Gaensler, B. M., Haverkorn, M., Poppi, S., 2016, *ApJ* 829, 18  
 Lehman, E. & Casella, G., *Theory of point estimation*, Springer-Verlag, New York  
 O'Sullivan, S., et al., 2017, *MNRAS* 469, 4034  
 Rudnick, L. & Owen, F. N. 2014, *ApJ* 785, 45

# Magnetic fields at the epoch of Reionization

B. Ruiz-Granados<sup>1,2</sup>, E. Battaner<sup>3,4</sup>, E. Florido<sup>3,4</sup> and J.A. Rubiño-Martín<sup>1,2</sup>

<sup>1</sup> Instituto de Astrofísica de Canarias, Vía Láctea, s/n, 38205, La Laguna, Tenerife, Spain  
 email: bearg@iac.es

<sup>2</sup>Dept. de Astrofísica, Universidad de La Laguna, La Laguna, Tenerife, Spain

<sup>3</sup> Dept. de Física Teórica y del Cosmos, Universidad de Granada, 18071, Granada, Spain

<sup>4</sup> Instituto de Física Teórica y Computacional Carlos I, Universidad de Granada, 18071, Granada, Spain

**Abstract.** We detected magnetic fields with strengths of the order of 1-10 nG at the epoch of Reionization. These were identified by using CMB data to obtain Faraday Rotation at both, the map and the spectrum level. The multipole region of about  $\ell < 12$  and the lack of correlations with either, galactic emissions (Faraday rotation, synchrotron and dust) or with CMB anisotropies and lensing, support this identification.

**Keywords.** Magnetic fields, cosmic microwave background, reionization

## 1. Faraday rotation of the CMB

A FR signal is detected by using foreground cleaned maps of Stokes' Q and U parameters provided by WMAP9 (Hinshaw et al., 2013) at frequencies 33, 41 and 61 GHz (Ruiz-Granados, Battaner & Florido, 2016). The optical depth of Thomson scattering derived from the bump induced on E-modes due to Reionization is sensitive to the thermal electron distribution  $n_e$  and peaks at low multipoles (Zaldarriaga, 1997), being its value  $\tau \sim 0.06$  (Planck VI Col., 2018). This is used for computing the rotation measure (RM), which is proportional to  $n_e$ , and finally for obtaining the mean-weighted magnetic field strength. RM maps are obtained by minimizing the  $\chi^2$  distribution of the polarized angle for the three frequencies. The associated covariance matrices are used for computing the error map (see Fig. 1). Cross-correlations at map level with galactic FR, extragalactic FR, synchrotron and dust polarization are computed and also with CMB temperature, lensing potential and noise maps (see Tab. 1). The angular power spectrum of the observed RM maps is obtained for low multipoles (see Fig. 1 bottom). From the FR power

**Table 1.** Correlation coefficients between maps in Fig.1 and foregrounds

| Maps                           | $r \pm \Delta r$ | Significance ( $ t $ ) | $R^2$                 |
|--------------------------------|------------------|------------------------|-----------------------|
| CMB temperature                | 0.009±0.015      | 0.62                   | $8.52 \times 10^{-5}$ |
| Obs. Galactic RM (1.4-23 GHz)  | 0.037±0.024      | 1.53                   | $1.4 \times 10^{-3}$  |
| Obs. Galactic RM (EGRS)        | 0.024±0.015      | 1.60                   | $5.67 \times 10^{-4}$ |
| Sim. Galactic RM (23 GHz) halo | 0.038±0.030      | 1.27                   | $1.4 \times 10^{-3}$  |
| $U_{23}$ -galactic             | -0.020±0.015     | 1.37                   | $4.1 \times 10^{-4}$  |
| $Q_{23}$ -galactic             | 0.019±0.015      | 1.27                   | $3.6 \times 10^{-4}$  |
| $U_{dust}$ -galactic           | 0.016±0.015      | 1.08                   | $2.6 \times 10^{-4}$  |
| $Q_{dust}$ -galactic           | 0.009±0.015      | 0.60                   | $7.95 \times 10^{-5}$ |
| $\phi_{dust}$ -galactic        | 0.034±0.015      | 2.28                   | $1.1 \times 10^{-3}$  |
| Noise $Q_{CMB}$                | -0.028±0.015     | 1.92                   | $8.2 \times 10^{-4}$  |
| Noise $U_{CMB}$                | -0.014±0.015     | 0.92                   | $1.8 \times 10^{-4}$  |
| Noise $\phi_{CMB}$             | 0.004±0.015      | 0.25                   | $1.39 \times 10^{-5}$ |
| Lensing potential              | 0.012±0.015      | 0.81                   | $1.45 \times 10^{-4}$ |

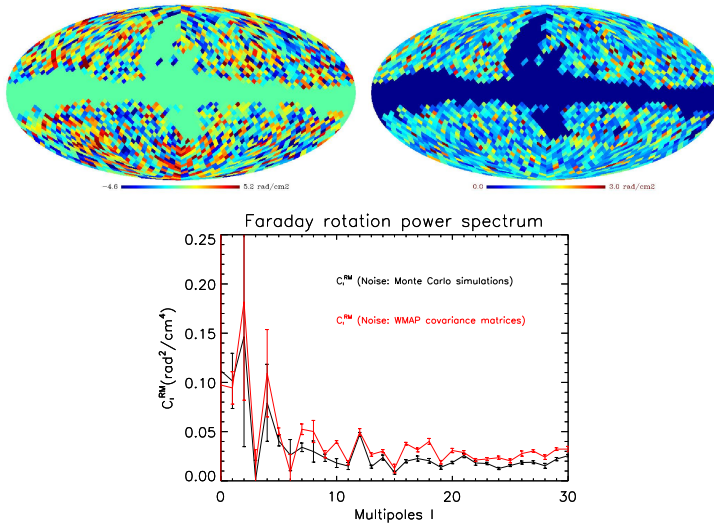

**Figure 1.** Map of the observational  $RM$  (top, left), its error map (top, right) and the power spectrum (bottom) by using WMAP9 at 33, 41 and 61 GHz.

**Table 2.** Values of the FR at 30 and 70 GHz and the mean-weighted magnetic field strength by computing the mean values between  $\ell = 2 - 6$ .

| FR ( $\nu = 30$ GHz)(deg) | FR ( $\nu = 70$ GHz) (deg) | $\langle B_{  } \rangle$ (G)     |
|---------------------------|----------------------------|----------------------------------|
| $36.0 \pm 20.6$           | $6.30 \pm 3.72$            | $6.88 \pm 4.06 (\times 10^{-8})$ |

spectrum, the mean-weighted magnetic fields strength are deduced by taking the mean value for multipoles  $\ell < 12$  (see Tab. 2).

## 2. Conclusions

The polarized intensity at Recombination are much lower than those of the Milky Way. However, the Recombination interpretation would require magnetic field strengths higher than the limits found by Planck of  $B_0 < 3.4 \times 10^{-9}$  G (Planck XIX Col., 2016 & POLARBEAR Col., Ade et al. 2015). No correlation is found with Recombination neither with Galactic foregrounds.

For low multipoles ( $\ell < 12$ ) we find a RM signal derived from the WMAP polarization maps. This multipole range is typical of phenomena taking place at Reionization. The amplitude and shape of the detected feature is consistent with magnetic fields at Reionization of the order of 1-10 nG.

## References

- Ade, P. A. R., Arnold, K., Atlas, M., *et al.* 2015, *Phys.Rev.D*, 92, 123509  
 Hinshaw, G., Larson, D., Komatsu, E., *et al.* 2013, *ApJS*, 208, 19  
 Planck Collaboration, Ade, P. A. R. *et al.* 2016, *A&A*, 594, A19  
 Planck Collaboration, Aghanim, N. *et al.* 2018, submitted to *A&A*, arXiv:1807.06209  
 Ruiz-Granados, B., Battaner, E. & Florido, E., 2016, *MNRAS*, 460, 3089  
 Zaldarriaga, M., 1997, *Phys.Rev.D*, 55, 1822

# Propagation of UHECRs in the local Universe and origin of cosmic magnetic fields

S. Hackstein<sup>1</sup>, F. Vazza<sup>2</sup>, M. Brüggen<sup>1</sup>, J. G. Sorce<sup>3</sup>, S. Gottlöber<sup>3</sup>

<sup>1</sup> Sternwarte Bergedorf, Universität Hamburg  
Gojenbergsweg 112, 21029, Hamburg, Germany

<sup>2</sup> INAF, Istituto di Radioastronomia di Bologna, via Gobetti 101, I-41029 Bologna, Italy

<sup>3</sup> Université de Strasbourg, CNRS, Observatoire astronomique de Strasbourg, UMR 7550,  
F-67000 Strasbourg, France

<sup>4</sup> Leibniz Institute for Astrophysics Potsdam, An der Sternwarte 16, 14482 Potsdam  
email: stefan.hackstein@hs.uni-hamburg.de,

**Abstract.** We simulate the propagation of cosmic rays at ultra-high energies,  $\gtrsim 10^{18}$  eV, in models of extragalactic magnetic fields in constrained simulations of the local Universe. We investigate the impact of different magneto-genesis scenarios, both, primordial and astrophysical, on the propagation of cosmic rays. Our study shows that different scenarios of magneto-genesis do not have a large impact on the anisotropy measurements. The distribution of nearby sources causes anisotropy at very high energies, independent of the magnetic field model. We compare our results to the dipole signal measured by the Pierre Auger Observatory. All our models could reproduce the observed dipole amplitude with a pure iron injection composition. This is due to clustering of secondary nuclei in direction of nearby sources of heavy nuclei. A light injection composition is disfavoured by the non-observation of anisotropy at energies of 4 - 8 EeV.

**Keywords.** MHD, methods: numerical, ISM: magnetic fields, cosmic rays

---

## 1. Introduction

We investigate constrained Magnetohydrodynamical (MHD) simulations of the local Universe for different scenarios of magneto-genesis and probe their influence on the propagation of ultra-high energy cosmic rays (UHECRs). We compare different source models to see what information can be inferred on the extragalactic magnetic field. The MHD simulations used constrained initial conditions (Sorce et al. 2016) and were performed with the MHD code ENZO<sup>†</sup>, which is an Adaptive Mesh Refinement (AMR) code for cosmological simulations. The resulting magnetic fields are used with the CRPropa<sup>‡</sup> code to simulate the propagation of UHECRs. The observer is placed at the center of the simulation, the defined position of the Milky Way.

We investigate two major scenarios for magneto-genesis: magnetic fields of primordial origin - prior to  $z = 60$ , where the MHD simulations start - with several spectral indices of the initial magnetic power spectrum (more info in Hackstein et al. 2018). We compare this scenario to an astrophysical origin, modelled with thermal and magnetic feedback of AGN at several different redshift ranges. We improve on Dolag et al. (2003) by testing these different scenarios and by obtaining the expected  $B$ - $\rho$ -ratio from a single consistent MHD simulation. Both scenarios reproduce magnetic fields observed in clusters reasonably well. The main difference is that in the low-density regions, i. e. the voids, the magnetic field strength differs by up to 10 orders of magnitude. The two scenarios are therefore well suited to highlight the influence of the low-density regions.

<sup>†</sup> <http://www.enzo-project.org>

<sup>‡</sup> <https://crpropa.desy.de/>

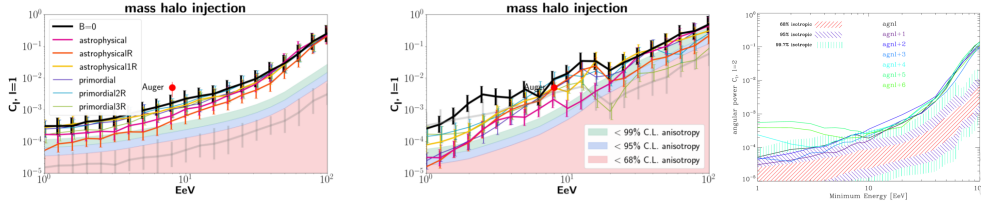

**Figure 1.** Results for angular power as function of minimum energy of considered events. The coloured bands indicate the confidence level of anisotropy. The dipole observed in the Auger data  $> 8$  EeV is indicated. Left: Dipole from pure proton injection. Center: dipole from pure iron injection. Right: Quadrupole from pure proton injection

## 2. Results

Anisotropy is measured with the angular power spectrum of spherical decomposition of the full sky of observed UHECR events. We consider as sources the center of viral halos identified in the MHD simulation, where the most energetic objects are most likely to be found. This source density is at the lower bound of allowed densities,  $\gtrsim 10^4$  Mpc $^3$ , as shown by di Matteo & Tinyakov (2017).

Results for the different scenarios of magneto-genesis are pretty converged, the fields in voids have minor influence on the large scale anisotropy signal of UHECRs. It is unlikely that we can identify magneto-genesis scenarios by full-sky observations of UHECR events without prior knowledge on their sources. For light injection composition, in order to reproduce the Auger dipole, a rather extreme source model is needed, that might already be at odds with present constraints. For a heavy composition the contribution of the most nearby sources increases, due to multiple allowed hits of secondary nuclei of the same primary particle. This effect is the strongest at  $E = E_{\max}/A$ , the maximum energy of secondary protons that can reach the observer only from the most nearby sources.

In another set of simulations, anisotropy occurs at low energies for an increased magnetic field strength, independent of the distribution of sources (results from Hackstein et al 2016). Here, a uniform field dominates around the sources. One can show that anisotropy is indeed expected in that case. The same is true for many fields with pronounced component in vertical direction. This offers the chance to put limits on such fields in the halo of the Milky Way.

## 3. Conclusions

- (a) light injection composition is unlikely to reproduce the Auger dipole while heavy injection increases multipoles.
- (b) anisotropy at highest energies enables UHECR astronomy
- (c) magneto-genesis scenario unlikely to be distinguished by UHECR observations
- (d) strong vertical magnetic field component introduces quadrupole anisotropy  $\Rightarrow$  limit magnetic fields in Milky Way halo.

## References

- di Matteo, A. and Tinyakov, P. 2018, *MNRAS*, 476, 715  
 Dolag K., Grasso D., Springel V., Tkachev I. 2004, *JETP Lett.*, 79, 583  
 Hackstein, S., Vazza, F., Brügggen M., Sigl, G., Dundovic, A. 2016, *MNRAS*, 462, 3660  
 Hackstein, S., Vazza, F., Brügggen, M., Sorce, J. G., Gottlöber, S. 2018, *MNRAS*, 475, 2519  
 Sorce, J. G. et al. 2016, *MNRAS*, 455, 2078

# Statistics and new detections of diffuse radio sources in galaxy clusters

Massimo Cau<sup>1,2</sup>, Gabriele Giovannini<sup>1,2</sup>, Alessandro Ignesti<sup>1,2</sup>

<sup>1</sup>IRA-INAF, Bologna IT,  
Via Gobetti 101, 40127, Bologna, Italy  
email: m.cau@ira.inaf.it

<sup>2</sup>Dept. of Astronomy & Astrophysics, Bologna University,  
Via Irnerio 46, 40126 Bologna, Italy  
email: massimo.cau@unibo.it

**Abstract.** The detection of diffuse radio emission in galaxy clusters (halos, relics and minihalos) is still limited to the nearby clusters ( $z \leq 0.3$ ). Recently, thanks to the improved sensitivity of the largest radio telescopes the number of diffuse radio source at  $z > 0.3$  has significantly increased, proving that this class of sources exists at even high redshifts. We obtained L-band observations at the Jansky Very Large Array (JVLA) to study a sample of high redshift massive clusters ( $0.3 < z < 0.7$ ). Our main goal is to investigate the evolutionary history of non thermal properties in galaxy clusters and to determine whether the correlations mostly observed at low redshift evolve with time.

**Keywords.** galaxies: clusters: general, acceleration of particles, diffusion, turbulence, radiation mechanisms: nonthermal, shock waves, instrumentation: interferometers, methods: statistical, surveys, X-rays: galaxies: clusters.

---

## 1. Introduction

Galaxy clusters are the largest gravitationally bound structures of the Universe, formed from density fluctuations and grown hierarchically through the extremely process of merging and mass accretion. They represent very interesting tools to study the cosmology and the evolution of large scale structures. In the last years, most of the detailed knowledge of galaxy clusters has been obtained from the study of thermal X-ray and non-thermal emissions of the intra-cluster medium (ICM). Observational evidences show the presence of a strong correlation between total radio power and X-ray luminosity, suggesting a strict interconnection between non-thermal properties and cluster mass (see Feretti et al. 2012 for review). Diffuse cluster radio sources are not present in all galaxy clusters. The occurrence of radio halos and relics has been studied by Giovannini et al. (1999) in the NVSS sample, finding that is higher in clusters showing high X-ray luminosity. Halos are present in  $\sim 20 - 30\%$  while relics in  $\sim 25\%$  of clusters with  $L_X > 5 \times 10^{44}$  erg  $s^{-1}$  but actually we do not know why not all bright massive clusters show a diffuse non thermal radio emission. To understand the physical mechanisms governing the formation processes of diffuse radio sources it is necessary to correlate the non-thermal cluster properties with the cluster evolution. Nevertheless, the discovery of non thermal diffuse emission and consequently the related statistical properties are still limited to low redshifts: up to date the overall average redshift for radio halos is 0.25 and 0.20 for radio relics.

## 2. Overview and implications

With the purpose to correlate the non thermal cluster properties with cluster evolution, we select an omogeneous sampe of very luminous X-ray clusters, most of them extracted from the Massive Cluster Survey (MACS) presented by Ebeling et al. 2007, 2010 and submitted an L-band (C and D arrays) observational proposal to the JVLA. Our proposal has been accepted with project ID: VLA/17A-025. We obtained the radio images of 36 clusters observed with the C array and 31 clusters observed with the D array. 25 clusters have been observed and reduced both in C and D configurations and therefore we studied the radio emission of 42 different clusters. We have detected diffuse radio emission in 18 clusters corresponding to  $\sim 42\%$  of our cluster sample. Among them we found 8 new diffuse radio structures, classified as 6 halos and 2 relics. The other 10 sources have already been discovered and reported in the literature, although most of them at different wavelengths. Reporting the new halos in the  $(P_{1.4GHz}, L_{X,500})$  plane and performing a best fit correlation (*Right panel* Fig. 1) we underline the following conclusions:

- the slope of the best fit for the halos hosted in clusters with  $z > 0.3$  (blue dotted line) results lower respect to the scaling relation reported in literature for halos with  $z < 0.3$  (black dotted line) (e.g. Cassano et al. 2013);
- new halos appear slightly underluminous in the radio band (green dotted line);
- new halos are in agreement with the correlation at  $z > 0.3$  ;

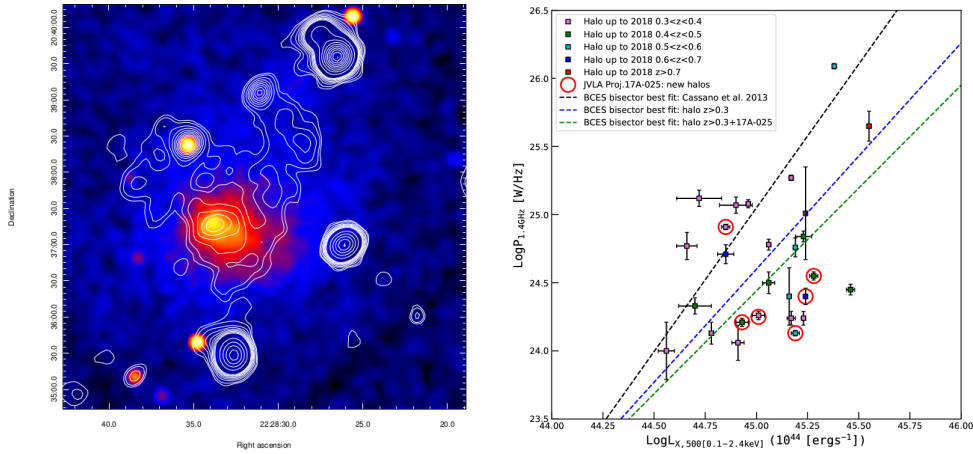

**Figure 1.** *Left panel* MACSJ2228.5+2036: example new halo detected at high redshift ( $z = 0.411$ ). Radio contours are overlaid to the *Chandra* X-ray image. *Right panel* Distribution of halos with  $z > 0.3$  in the  $(\log(P_{1.4GHz}), \log(L_{X,500}))$  plane: colored dots are referred to different redshift ranges. Red circled dots are the new halos discovered in Proj. 17A-025. Comparison between scaling relations: literature (black dotted line), updated halo collection at  $z > 0.3$  (blue dotted line), updated halo collection at  $z > 0.3$  plus new halos (green dotted line).

## References

- Cassano, R., Ettori, S., Brunetti, G. 2013, *Astrophysical Journal*, 777, 141  
 Ebeling, H., Barret, E., Donovan, D. 2007, *Astrophysical Journal Letters*, 661, L33  
 Ebeling, H., Edge, A.C., Mantz, A. 2010, *Monthly Notices of the RAS*, 407, 83  
 Feretti, L., Giovannini, G., Govoni, F., & Murgia, M. 2012, *Astrophysics Reviews*, 20, 54  
 Giovannini, G. 1999, in *Diffuse Thermal and Relativistic Plasma in galaxy Clusters*, ed. H. Bohringer, L. Feretti, & P. Schuecker, 13



# Spectral analysis of magnetic fields in simulated galaxy clusters

Paola Domínguez-Fernández<sup>1</sup>, Franco Vazza<sup>3,1,2</sup> and Marcus Brüggen<sup>1</sup>

<sup>1</sup>Hamburger Sternwarte, Gojenbergsweg 112, 21029 Hamburg, Germany  
email: pdominguez@hs.uni-hamburg.de  
email: mbrueggen@hs.uni-hamburg.de

<sup>2</sup> Istituto di Radio Astronomia, INAF, Via Gobetti 101, 40121 Bologna, Italy

<sup>3</sup> Dipartimento di Fisica e Astronomia, Università di Bologna, Via Gobetti 92/3, 40121, Bologna, Italy  
email: franco.vazza2@unibo.it

## Abstract.

We introduce a new sample of galaxy clusters obtained from a cosmological simulation covering an unprecedented dynamical range. All the clusters in our sample show a clear signature of small-scale dynamo amplification. We show that it is possible to use dynamo theory for studying the magnetic spectrum in the intracluster medium. We study if the intrinsic variations on the spectra depend on the dynamical history of each cluster or on some host cluster properties.

**Keywords.** galaxy: clusters, general – methods: numerical – intergalactic medium – large-scale structure of Universe

## 1. Introduction

Galaxy clusters evolve mainly via two mechanisms: accretion of gas and galaxies, and via mergers occurring approximately every few Gyr. These mechanisms directly affect the diffuse, hot, weakly magnetised gas observed in clusters referred as the Intracluster Medium (ICM) (e.g. Kravtsov & Borgani 2012, Brunetti & Jones 2014) by driving shocks through it and therefore, every merger event can be a source of turbulence. In particular, these events effectively affect the structure of the magnetic fields that permeate galaxy clusters.

We know from radio observations that the strength of magnetic fields in the ICM is of the order of  $\mu\text{G}$  and the coherence scales are of the order of 10-50 kpc (e.g. Feretti, et al. 2012, Govoni et al. 2017). These coherent large-scale fields indicate that the mechanism which leads to this final structure cannot be solely due to gas compression. In fact, a small-scale dynamo would be a more suitable mechanism to generate observed, large-scale magnetic fields. While the origin of magnetic fields in the Universe remains an open question, a small-scale dynamo seems to play a key role in amplifying magnetic fields in galaxy clusters (e.g. Beresnyak & Miniati 2015), independent of where the seed fields come from.

## 2. Methods and Results

We studied the formation of seven massive galaxy clusters in a cosmological MHD simulation with the *ENZO* grid code (The Enzo Collaboration; Bryan et al. 2014) using the Dedner cleaning method, and eight adaptive mesh refinement (AMR) levels to increase the dynamical resolution. Each cluster was selected in a comoving volume of  $(260 \text{ Mpc})^3$  and further refined in most of the volume in which the clusters form with a maximum spatial resolution of  $\Delta x_{\text{max}} = 3.95 \text{ kpc}$  (comoving). We assumed a simple uniform seed field of cosmological origin of 0.1 nG (comoving) at  $z = 30$  (for a detailed description see Vazza et al. 2018). In this work, we will only discuss the results from *non-radiative* cosmological simulations to focus on the growth of magnetic fields by the turbulence induced by structure formation processes.

We analyse clusters with different dynamical states at redshift  $z = 0$ , namely clusters with ongoing mergers, relaxed ones and clusters that have suffered a recent major merger. The baseline model we tested with our cosmological simulation relies on an analytic solution for the magnetic power spectrum derived from dynamo theory (Kazantsev 1967, Kulsrud & Anderson 1992). Our tests (Domínguez-Fernández et al., to be submitted) show that all spectra can be fitted well by an equation which is directly derived from dynamo theory (see Eq. in Fig. 1). In Fig.1 we show the best-fit of the magnetic energy spectra of all of the clusters in our sample.

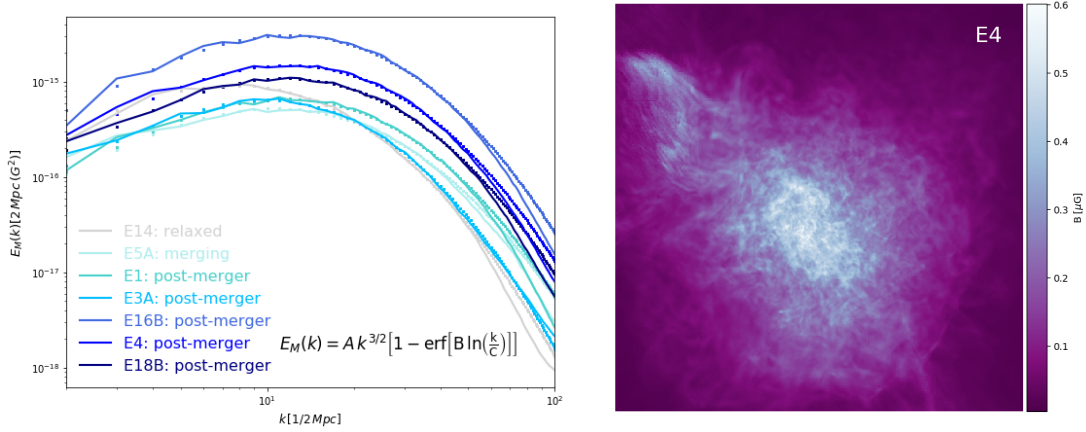

**Figure 1.** *Left:* Magnetic energy spectra of all of our cluster sample at  $z = 0$ . The solid lines correspond to the data and the scatter plots show our best-fit. *Right:* Projection of the magnetic field strength in galaxy cluster E4 at  $\Delta x_{\text{max}}$

## Discussion

1) Regardless of the dynamical state of each cluster, the magnetic energy spectral shape is in good agreement with dynamo theory. As a first approximation, this indicates that this model can be used for a detailed analysis of a cluster evolution where a small-scale dynamo can be acting in addition to gas compression and shocks.

2) The normalization of the magnetic energy spectrum overall is determined by the dynamical state of each cluster. Relaxed clusters have the highest value for the magnetic spectrum, followed by post-mergers clusters, and then merging clusters. This result is tentatively consistent with the fact that in relaxed system a small-scale dynamo would have to be active for longer dynamical times. Nevertheless, we do not observe a clear dependence on the virial mass of each cluster due to the small number of clusters in our sample.

3) Our analysis shows that the magnetic power spectra does not retain information on the last major-merger, as minor mergers are also injecting turbulence during the formation of each cluster.

4) We refer the reader to the complete work (Domínguez-Fernández et al., to be submitted) where a detailed analysis on the cluster sample is done and where also the evolution of a merging cluster is studied.

5) The resulting power spectrum shows that in general the three-dimensional components of the magnetic field are non-Gaussian. This results from having different magnetic field components being continuously injected by the accretion of substructures (Vazza et al. 2018) rather than from the presence of highly intermittent MHD turbulence (e.g. Shukurov et al. 2017). This has direct consequences for Faraday Rotation measurements and illustrates the importance of reliable simulations of magnetic fields in galaxy clusters for an accurate modelling of future polarisation surveys (e.g. Johnston-Hollitt et al. 2015).

## Acknowledgements

Our simulations were performed using *ENZO* and the Supercomputing resources at the Juelich Supercomputing Centre (JSC), under project HHH42. We acknowledge the European Union’s Horizon 2020 program under the ERC Starting Grant ”MAGCOW”, no. 714196.

## References

- Beresnyak & Miniati 2015, *ApJ*, 817, 127  
 Brunetti, G. & Jones, T. W. 2014, *International Journal of Modern Physics D*, 23, 1430007-98  
 Bryan G. L. et al. 2014, *ApJS*, 211, 19  
 Feretti, L. and Giovannini, G. and Govoni, F. and Murgia, M. 2012, *A&ARv*, 20, 54  
 Govoni, F., et al. 2017, *A&A*, 603, 122  
 Johnston-Hollitt et al 2015, *Advancing Astrophysics with the SKA (AASKA14)*, 92  
 Kazantsev A. P. 1967, *Journal of Experimental and Theoretical Physics*, 53, 1806  
 Kravtsov, A. V. & Borgani, S. 2012, *ARAA*, 50  
 Kulsrud R. M., Anderson S. W. 1992, *AJ*, 396, 606  
 Shukurov et al. 2017, *ApJL*, 839, L16  
 Vazza F., Brunetti G., Brüggen M., Bonafede A. 2018, *MNRAS*, 474, 1672

# CHANG-ES: an overview

Jeroen M. Stil<sup>1</sup>  
on behalf of the CHANG-ES<sup>2</sup> collaboration

<sup>1</sup>Department of Physics and Astronomy, The University of Calgary,  
2500 University Drive NW, Calgary, AB, T2N 1N4, Canada  
email: [jstil@ucalgary.ca](mailto:jstil@ucalgary.ca)

<sup>2</sup> <http://queensu.ca/changes>

**Abstract.** CHANG-ES is a survey of 35 edge-on galaxies of total intensity, linear and circular polarization in L band and C band with the Jansky Very Large Array. The goal of the survey is to investigate the origin, extent, and physical conditions of radio halos, and their connection with star formation in the disk. We present an overview of the survey and highlight some results.

**Keywords.** magnetic fields, polarization, galaxies, galaxy halos

---

## 1. Introduction to CHANG-ES

The Continuum Halos in Nearby Galaxies - an EVLA Survey (CHANG-ES) is a survey of 35 nearby edge-on ( $i > 75^\circ$ ) galaxies of all Stokes parameters in L band ( $\nu = 1.5$  GHz,  $\Delta\nu = 500$  MHz) and C band ( $\nu = 6$  GHz,  $\Delta\nu = 2$  GHz) with the Karl G. Jansky Very Large Array. The sample was selected for isophotal diameter ( $4' < d_{25} < 15'$ ),  $\delta > -23^\circ$ , and  $S_{1.4\text{GHz}} > 23$  mJy, with three well-known galaxies added just outside these boundaries (Irwin *et al.* 2012). Each galaxy was observed in L band in B, C, and D configuration, and in C band in C and D configuration to provide matching angular resolution up to  $4''$ , with sensitivity  $\sim 20$   $\mu\text{Jy}/\text{beam}$  (L band) and  $\sim 4$   $\mu\text{Jy}/\text{beam}$  (C band), and sensitivity to angular scales up to  $16'$  in L band and  $4'$  in C band. Missing short spacings will be filled in with the Green Bank Telescope (Trent Braun *et al.* 2018).

CHANG-ES aims to characterize all aspects of radio halos in spiral galaxies, including their extent, magnetic field, relation to star formation in the disk, and cosmic ray transport. Sensitive, broad-band full-Stokes images from CHANG-ES provide spatially resolved spectral index and Faraday rotation from the disk far into the halo. Now that such data are available for a sample of 35 edge-on galaxies, it is possible to investigate galaxy scaling relations and statistics of halo properties in relation to star formation.

CHANG-ES has so far released D-configuration images with resolution  $36''$  (L-band) and  $9.6''$  (C-band) for all galaxies (Wiegert *et al.* 2015). These data and future data releases will be made available through the website <http://queensu.ca/changes>.

## 2. Selected results from CHANG-ES

Edge-on galaxies are particularly suitable for investigation of the vertical structure of the halo and disk-halo interaction. The radio halo extends far above the disk for the median edge-on galaxy (Wiegert *et al.* 2015). Krause *et al.* (2018) found the average scale height of 13 CHANG-ES galaxies to be  $1.1 \pm 0.3$  kpc in C band and  $1.4 \pm 0.7$  kpc in L band. The radio scale height increases linearly with diameter of the galaxy, but there is no correlation with the star formation rate, or the star formation rate per unit area. The frequency dependence of halo scale heights indicates an escape-dominated halo (escape time shorter than cosmic ray life time) with convective propagation for all galaxies.

CHANG-ES measures polarization angle structure and Faraday rotation in the disk and halo. Posters by M. Krause and R.-J. Dettmar at this meeting report large-scale field reversals from Faraday rotation of the diffuse synchrotron emission - a first for edge-on galaxies and in particular galaxy halos. The Virgo cluster galaxy NGC 4388 shows extensions of the magnetic field that indicate a connection between the disk and the halo (Damas-Segovia *et al.* 2016). The polarized structure in the halo in relation to H- $\alpha$  and X-ray emission appears to trace a galactic wind from separate sources in the spiral arms. NGC 4388 experienced recent ram pressure stripping from its motion through the Virgo cluster (Oosterloo & van Gorkom 2005), but the observed symmetry of the polarized halo excludes compression of the halo by ram pressure. A poster by A. Damas-Segovia at this meeting discusses polarization of the AGN outflow in NGC 4388.

The deep radio images from CHANG-ES are combined with multi-wavelength data to investigate the relation between star formation, the magnetic field, and synchrotron emission. Li *et al.* (2016) found that the slope of the mid-IR/radio correlation for CHANG-ES galaxies is super-linear, an indication that galaxies with a higher star formation rate are closer to calorimetric conditions for cosmic ray electrons (see also Yoast-Hull *et al.* 2013). The CHANG-ES data allow separation of diffuse halo emission from disk emission. Vargas *et al.* (2018) used WISE 22 $\mu$  and new deep H- $\alpha$  images to derive spatially resolved separation of thermal radio emission for CHANG-ES galaxies.

CHANG-ES also reveals low-luminosity active galactic nuclei in several galaxies. Variability in the unresolved core of NGC 4845 on a time scale of six months between CHANG-ES observations was associated with a tidal disruption event by the super-massive black hole in the nucleus (Irwin *et al.* 2015). The large bandwidth provided single-epoch in-band spectral indices, negative in C band but positive in L-band from synchrotron self-absorption. The peak of the spectrum decreased in brightness as it shifted to lower frequencies over time. The emission was circularly polarized with no detectable linear polarization. Circular polarization from the nucleus was also detected in four other galaxies (Irwin *et al.* 2018). The galaxy NGC 2992 was shown to have kpc sized bipolar outflows that are only revealed in polarization, not in total intensity (Irwin *et al.* 2017).

The galaxy UGC 10288 was included in the sample, but the VLA images showed that most of the radio flux was from a large radio galaxy in the background that crosses the disk of UGC 10288. Irwin *et al.* (2013) analyzed the Faraday rotation of this extended background source and found that the azimuthal component of the magnetic field hints at a direction reversal.

## References

- Damas-Segovia, A., Beck, R., Vollmer, B., *et al.* 2016, *ApJ*, 824, 30  
 Irwin, J. A., Beck, R., Benjamin, R. A., *et al.* 2012, *AJ*, 144, 43  
 Irwin, J. A., Krause, M., English, J., *et al.* 2013, *AJ*, 146, 164  
 Irwin, J. A., Henriksen, R. N., Krause, M., *et al.* 2015, *ApJ*, 809, 172  
 Irwin, J. A., Schmidt, P., Damas-Segovia, *et al.* 2017, *MNRAS*, 464, 1333  
 Irwin, J. A., Henriksen, R. N., Weżgowiec, M., *et al.* 2018, *MNRAS*, 476, 5057  
 Krause, M., Irwin, J. A., Wiegert, T., *et al.* 2018, *A&A*, 611, A72  
 Li, J.-T., Beck, R., Dettmar, R.-J., *et al.* 2016, *MNRAS*, 456, 1723  
 Oosterloo, T., & van Gorkom, J. 2005, *A&A*, 437, L19  
 Trent Braun, T., Kepley, A., Rand, R. J., *et al.* 2018, *BAAS* 231, 248.07  
 Vargas, C., Mora-Partiarroyo, S., Carolina, S., *et al.* 2018, *ApJ*, 853, 128  
 Wiegert, T., Irwin, J., Miskolczi, A., *et al.* 2015, *AJ*, 150, 81  
 Yoast-Hull, T. M., Everett, J. E., Gallagher III, J. S., *et al.* 2013, *ApJ*, 768, 53

# The QUOCKA Survey: Early Results

George Heald<sup>1</sup> and the QUOCKA Team<sup>2</sup>

<sup>1</sup>CSIRO Astronomy and Space Science, PO Box 1130, Bentley WA 6102, Australia  
email: [george.heald@csiro.au](mailto:george.heald@csiro.au)

<sup>2</sup><https://research.csiro.au/quocka/team/>

**Abstract.** We present early results from QUOCKA: a new polarimetric radio survey aimed at understanding detailed magnetoionic properties of radio galaxies, and enabling the science goals of modern broadband surveys to be carried out with Square Kilometre Array (SKA) pathfinders and precursors. The QUOCKA survey employs the broadband correlator available at the Australia Telescope Compact Array (ATCA), primarily to build on and supplement Early Science observations with the Australian Square Kilometre Array Pathfinder (ASKAP) telescope. Just over 200 sources have been observed so far, and the sample is currently expanding.

**Keywords.** magnetic fields, polarization, surveys, radio continuum: galaxies

---

## 1. Introduction

In this contribution we present early results from a new project using the Australia Telescope Compact Array (ATCA): *QU Observations at Cm wavelength using Km baselines with the ATCA* (the QUOCKA survey). A survey overview has been presented in a companion contribution (Heald et al. 2018a, this volume).

## 2. Survey progress and plans

To date, the survey has been allocated 494 hours, with 234 hours already observed and the remainder scheduled. QUOCKA has been granted Continuing Status at the ATCA.

The QUOCKA sample is being drawn from polarized sources detected by ASKAP during the telescope’s Early Science period, as described by Heald et al (2018a, this volume). The subsample observed in the first semester was based on sources found in six 30-square degree ASKAP mosaics. As the Early Science period progresses and additional suitable sources are identified, we are growing the list of objects to be followed up with the ATCA. Eventually, our goal is to expand the scope of the QUOCKA project to elucidate and model the broadband polarimetric behaviour of the brightest sources detected by the ASKAP POSSUM survey ( Gaensler et al. 2010).

Observations are carried out with ATCA at 1 – 3 and 4.5 – 8.5 GHz, in extended east-west configurations. Several short snapshots over a wide range of hour angle are used to improve the resulting image fidelity. The typical sensitivity is  $\sim 100 \mu\text{Jy beam}^{-1}$  in each of the two broad frequency bands.

The QUOCKA team has developed a PYTHON-based data reduction pipeline† that utilizes standard MIRIAD ( Sault et al. 1995) procedures. We have performed initial processing of all 201 sources that were observed to date. In addition, 12 highly extended sources have also been observed with the same frequency setup and are being analysed separately (Alexander et al., in prep).

† <https://github.com/gheald/quocka>

### 3. Data and preliminary results

Here, we present an example of image quality (Figure 1) and broadband polarization response (Figure 2), for a representative QUOCKA source selected at random. Data of similar quality are already available for 200 other QUOCKA sources.

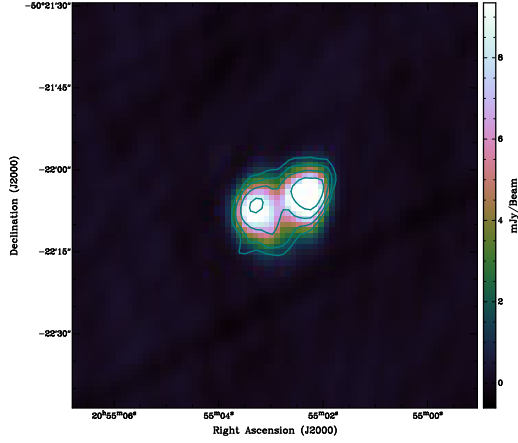

**Figure 1.** Representative ATCA images of the QUOCKA source J205503-502206. These total intensity images are presented in colourscale for the 4.5 – 8.5 GHz band, and with contours for the 1 – 3 GHz band. Contours begin at  $1.5 \text{ mJy beam}^{-1}$  ( $\approx 6\sigma$ ) and increase by powers of two.

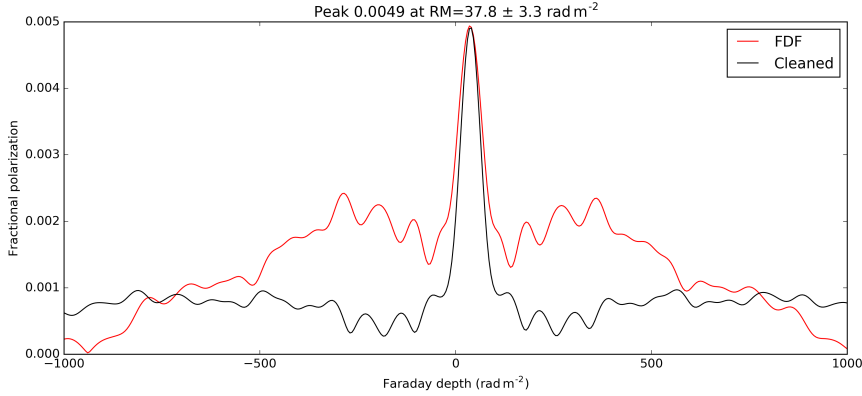

**Figure 2.** Indicative broadband Faraday dispersion function (FDF) before and after Faraday deconvolution, displayed here for the centre of QUOCKA source J205503-502206. That part of the source peaks at a Faraday depth of  $37.8 \pm 3.3 \text{ rad m}^{-2}$ . The broadband Stokes  $Q, U(\lambda^2)$  data make fitting of detailed magnetoionic models possible (e.g., O’Sullivan et al. 2012).

### References

- Gaensler, B. M., Landecker, T. L., Taylor, A. R., & POSSUM Collaboration. 2010, in Bulletin of the American Astronomical Society, Vol. 42, American Astronomical Society Meeting Abstracts #215, 515
- O’Sullivan, S. P., Brown, S., Robshaw, T., et al. 2012, *MNRAS*, 421, 3300
- Sault, R. J., Teuben, P. J., & Wright, M. C. H. 1995, in Astronomical Society of the Pacific Conference Series, Vol. 77, Astronomical Data Analysis Software and Systems IV, ed. R. A. Shaw, H. E. Payne, & J. J. E. Hayes, 433

# Magnetized stars embedded in AGN accretion disks and tori

M. Zajaček<sup>1,2</sup> and V. Karas<sup>3</sup>

<sup>1</sup>Max-Planck-Institut für Radioastronomie (MPIfR), Auf dem Hügel 69, Bonn, Germany

<sup>2</sup>Universität zu Köln, Zùlpicher Strasse 77, D-50937 Köln, Germany

<sup>3</sup>Astronomical Institute, Czech Academy of Sciences, Boční II 1401, Prague, Czech Republic

**Abstract.** As a result of stellar evolution, a population of magnetized stars is expected to be part of Nuclear Star Clusters (NSCs) residing in many galactic nuclei. In Active Galactic Nuclei (AGN) NSCs are embedded within an accretion disk or a torus near an supermassive black hole (SMBH). The dipole-type magnetic field can significantly influence the gaseous environment in the region of influence around the star, depending on the intrinsic strength of its dipole and parameters of the surrounding medium. We estimate the fraction of the volume in the accretion disk/torus where the structure must be entirely changed by the presence of the embedded magnetized stars, as compared with an unperturbed solution. This is also the case of magnetized, compact neutron stars, where the surface intensity of the magnetic field can reach rather extreme values. In particular, young magnetars are expected to produce inhomogeneities in the external magnetic field of hot corona, scale of which range  $\lesssim 100$  SMBH Schwarzschild radii ( $r_s$ ).

**Keywords.** galaxies: nuclei, accretion, stars: neutron

---

## 1. Summary of the analysis

Most galactic nuclei contain supermassive black holes that are surrounded by nuclear star clusters (NSC) with typical half-light radii of 2-3 parsecs and masses of  $10^6$ - $10^7$  Solar masses (Schödel et al., 2014). The most studied example is the Milky Way, where the center of NSC is associated with the compact radio source of Sgr A\* (see Eckart et al., 2017 for a review and references therein). Unlike the case of AGN, the present Sgr A\* environment forms a diluted quasi-spherical Bondi-type inflow/outflow solution rather than a standard AGN accretion disk. In fact, based on the near-infrared studies, it appears that Milky Way's NSCs has undergone several episodic star-formation events triggered by an infall of molecular clouds. As a result, the system contains both early- and late-type stars of different masses. They are also expected to contain compact remnants, in particular, magnetized neutron stars that can efficiently interact with the ionized hot accretion flow in the inner  $\sim 10^4 R_s$  (Zajaček et al., 2015; Karas et al., 2017).

In the further discussion, we focus on neutron stars and the typical length-scales of their magnetospheres in a mutual interaction with SMBH accretion flow. Let us consider the spin-down energy of neutron stars, which is in the dipole model related to the period, period derivative, and surface magnetic field intensity,  $\dot{E} \propto \dot{P}/P^3$  and  $\dot{E} \propto B^2 P^{-4}$ . As a neutron star passes through the accretion flow, a stationary cavity is formed whose size  $R_{NS}$  is determined by the pressure equilibrium between the magnetospheric pressure  $P_{\text{elmag}}$  of a neutron star on one hand and the ram pressure  $P_{\text{ram}}$ , the combined gas and magnetic pressure on the other hand. The magnetic pressure of the accretion flow is a fraction  $\delta$  of the gas pressure,  $P_{\text{mag}} = \delta P_{\text{gas}}$ , where  $\delta \sim 0.1$  (Yuan et al., 2002). One can

thus write,

$$P_{\text{elmag}} = P_{\text{ram}} + P_{\text{gas}}(1 + \delta), \quad \frac{\dot{E}}{4\pi r^2 c} = \rho_a [v_{\text{rel}}^2 + (1 + \delta)c_s^2],$$

$$R_{\text{NS}}^2 = \frac{\dot{E}}{4\pi c \rho_a [v_{\text{rel}}^2 + (1 + \delta)c_s^2]}.$$
(1.1)

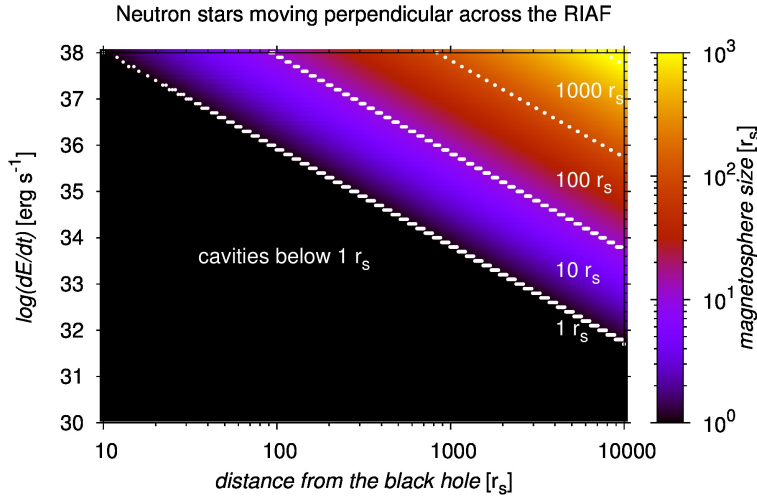

**Figure 1.** Typical length-scales of magnetospherical interaction of magnetized neutron stars calculated according to Eq. (1.1) as a function of the spin-down energy rate  $\dot{E}$  and the distance from the SMBH. For this calculation, neutron stars cross the RIAF solution of Sgr A\* and move perpendicular to its motion.

For an exemplary calculation, we consider the density and the temperature profile of the radiatively inefficient accretion flow (RIAF) as inferred for Sgr A\*. Neutron stars cross the RIAF perpendicular to its midplane with a Keplerian velocity at a given distance. The distribution of sizes of the neutron-star magnetospheres is plotted in Fig. 1 as a function of the spin-down energy and the distance from the SMBH. We obtain the scaling of magnetosphere sizes with the distance from Sgr A\*, in which the typical length-scale of magnetospheres is approximately one order of magnitude smaller than the distance from the SMBH for  $\log(\dot{E}[\text{erg s}^{-1}]) = 38$ , e.g.  $R_{\text{NS}} \approx 100 r_s$  at the distance of 1000 Schwarzschild radii. The length-scale  $R_{\text{NS}}$  from Eq. (1.1) also represents the typical scale of inhomogeneities of the global magnetic field of the RIAF caused by the population of neutron stars in galactic nuclei. We note that this length-scale is about four orders of magnitude smaller in the standard thin disc due to larger densities. However, since the hot corona is expected to be present beyond the thin disc midplane, a broad distribution of magnetosphere sizes is generally expected in the inner  $10^3$  Schwarzschild radii.

## References

- Eckart, A., Hüttemann, A., Kiefer, C. et al. 2017, *Foundations of Physics*, 47, 553  
Karas, V., Kopáček, O., Kunneriath, D. et al. 2017, *CoSka*, 47, 124  
Schödel, R., Feldmeier, A., Neumayer, N. et al. 2014, *CQG*, 31, id. 244007  
Yuan, F., Markoff, S., and Falcke, H. 2002, *A&A*, 383, 854  
Zajaček, M., Karas, V., and Kunneriath, D. 2015, *Acta Polytechnica*, 55, 203



# Variability of magnetically-dominated jets in blazars and gamma ray bursts

Agnieszka Janiuk<sup>1</sup>, Jeremy Mortier<sup>1</sup> and Konstantinos Sapountzis<sup>1</sup>

<sup>1</sup>Center for Theoretical Physics,  
Polish Academy of Sciences, Al. Lotnikow 32/46, 02-668 Warsaw, Poland  
email: agnes@cft.edu.pl

**Abstract.** The fastly variable accretion flows are found in a number of different types of astrophysical black hole sources. At largest scales, they are present in the cores of active galaxies. In the radio-loud objects, such as blazars, the variability of the inflow can be transmitted to the outflow properties. In these sources, the relativistic jets are pointing to our line of sight. In addition, many similarities are found between the jet physics in blazars and in gamma ray bursts. The latter are observed from extragalactic distances, but operate at smaller scales, within the stellar-mass accreting black holes and in collapsing star's environment. Observational studies have shown an anti-correlation between minimum variability time scale and Lorentz factor of the emitted jet. Motivated by those observational properties of black hole sources, we investigate the accretion inflow and outflow properties, by means of numerical GR MHD simulations.

**Keywords.** accretion, accretion disks, black hole physics, magnetic fields, hydrodynamics, MHD, gamma rays: bursts, galaxies: jets

---

## 1. Introduction

Blazars and gamma ray bursts share the properties of their jets, despite different Lorentz factors and accreting black hole masses (Wu et al. 2015). Launching and collimation mechanisms are common: thick disk or corona, pressure gradient in surrounding wall, external (matter dominated) jet, or toroidal magnetic field. Acceleration of jets occurs due to both magnetic field action field and accretion disk rotation (see Fragile 2008 for a review). The blazar jets are Poynting-dominated, and powered by the Blandford-Znajek mechanism which can extract energy from a rotating black hole. This mechanism is now well known and tested in the purpose of a jet launching, but observations are showing variability in the jet emission. Multiple shocks that collide in the jet, can lead to multiple emission episodes and can account for the fluctuating light curve. A reasonable interpretation of this effect is that the variability observed in the jets can directly reflect the central engine variability. The latter is tightly related to the action of magnetic fields in the center of the galaxy.

We present here the two-dimensional magneto-hydrodynamical models computed in full General Relativity (GR MHD). The numerical scheme is our implementation of the code HARM (Gammie et al. 2003, Janiuk et al. 2013). The properties of magnetic fields and their role in evolution in the flows are studied in detail. Our initial condition assumes the existence of a pressure equilibrium torus, embedded in the poloidal magnetic field which lines follow the isocontours of constant density (Fig. 1 left and middle panel). The Kerr black hole accretes matter from the torus, and the rotation affects the magnetic field evolution. The models are parameterized with the black hole spin, and the initial magnetization of the matter. Code works in GR framework, so dimensionless units are adopted, with  $G = c = M = 1$ . Hence, geometrical time is given as  $t = GM/c^3$ , where

$M$  is the black hole mass. In this way, we are able to model the launching and variability of jets in both supermassive black hole environment, and in gamma ray bursts.

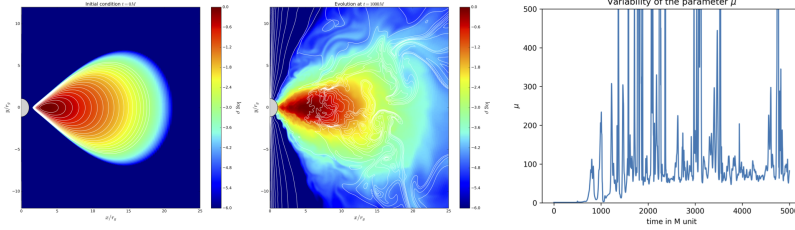

**Figure 1.** Left: initial configuration of the simulation (logarithm of density, in the code units). Middle: evolved state, after 1000 geometrical time units. Right: Variability of the  $\mu$  parameter in time.

## 2. Variability of the jet

*Energetic parameter.* Variable energy output reflects the MRI instability timescale, which is well resolved through the adequate number of grid cells per MRI wavelength. The total plasma energy flux is given by parameter  $\mu = -T_t^r / \rho u^r$ . If the Poynting and thermal energy are fully transformed to bulk kinetic, the parameter  $\mu$  can be interpreted as the Lorentz factor at infinity (Vlahakis & Koenigl 2003). Its value depends on location in the jet.

*Correlation between Lorentz factor and minimum variability time scale.* The minimum variability timescale, MTS, can be anti-correlated with the bulk Lorentz factor in the jet, if the magnetically arrested (MAD) flow is considered (Lloyd-Ronning et al. 2018). However, in the MAD mode, the flux accumulated at the BH horizon, and the interchange instability rather than MRI governs the minimum timescale of variability. In our simulation the accretion is not in a MAD state, and the Lorentz factor at infinity is given by the  $\mu$  parameter. Its variability correlates with MRI timescale, interpreted in our model as the origin of the variability in the jet (Fig. 1 right panel).

## 3. Conclusions

The variable energy output from the central engine implies the varying jet Lorentz factor, which may lead to occurrence of internal shocks, and affect both GRBs and blazars observed variability. Unification of the models across the black hole mass scale, from GRBs to blazars, is not straightforward though. The most uncertain aspect is whether the MAD state drives the jets in both type of sources, or rather halts the GRB emission.

**Acknowledgment** This work is supported by the grants UMO-2016/23/B/ST9/03114 from the Polish National Science Center and GB 70-4 from the Interdisciplinary Center for Mathematical Modeling

## References

- Gammie C.F., McKinney J.C., Toth G. 2003, *ApJ*, 589, 444  
 Janiuk, A., Mioduszewski, P., & Moscibrodzka, M. 2013, *ApJ*, 776, 105  
 Vlahakis, N., & Koenigl, A. 2003, *ApJ*, 596, 1080  
 Fragile, P.C. 2008, *Proceedings of Science*, vol. 39, “Microquasars and Beyond”  
 Wu, Q., Zhang B., Lei W.-H., Zou Y.-C., Liang E.-W., Cao X. 2015, *MNRAS*, 455, L1  
 Lloyd-Ronning, N., Lei W.-H., Xie, W. 2018, *MNRAS*, 478, 3525

# Magnetic Fields and Cosmic Ray Diffusion in M 31

Rainer Beck<sup>1</sup> and Elly M. Berkhuijsen<sup>1</sup>

<sup>1</sup> Max-Planck-Institut für Radioastronomie, Auf dem Hügel 69, 53121 Bonn, Germany  
email: rbeck@mpifr-bonn.mpg.de

**Abstract.** Three new, deep radio continuum surveys of the Andromeda galaxy M 31 have been performed with the Effelsberg 100-m telescope. The high degrees of polarization show that the magnetic field in M 31 is exceptionally ordered because an efficient large-scale dynamo operates due to the strong differential rotation and the low star-formation rate. A regular axisymmetric spiral field dominates, indicating that the dynamo operates in its ground mode.

**Keywords.** galaxies: spiral, galaxies: individual: M 31, galaxies: magnetic fields, cosmic rays

## 1. Introduction

Synchrotron radio emission is the best tool to study cosmic magnetic fields. The intensity is a measure of field strength, its linear polarization is a signature of ordered fields, and the polarization angle gives the field orientation in the sky plane. Faraday rotation of the polarization angle depends on the square of wavelength, the density of thermal electrons, and the strength of the regular field component along the line of sight; the sign of the Faraday rotation gives the field direction. Ordered fields generated by a large-scale ( $\alpha$ - $\Omega$ ) dynamo reveal a coherent direction and are called regular fields (see Beck 2016 for a review).

The radio emission and magnetic field properties of M 31 have been studied extensively with the Effelsberg 100-m and VLA radio telescopes (e.g. Beck 1982, Berkhuijsen et al. 2003, Fletcher et al. 2004). The polarization and Faraday rotation data, derived from polarization surveys at 6 cm, 11 cm and 20 cm wavelengths, can be well described by a regular magnetic field with an axisymmetric spiral pattern. Such a field is a strong indication of the lowest mode excited by a large-scale dynamo (e.g. Beck et al. 1996). M 31 is the prototype of a dynamo-generated magnetic field.

Polarized emission from strongly inclined galaxies like M 31 at wavelengths of  $\geq 6$  cm suffers from Faraday depolarization along the line of sight through the disk. Hence,

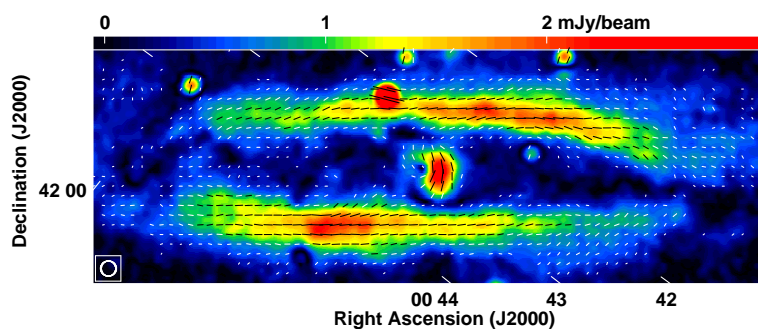

**Figure 1.** Polarized intensity at 6.2 cm and B-vectors, corrected for Faraday rotation, at  $2.6'$  resolution. The degree of polarization reaches 50% in the ring (from Gießübel 2012).

**Table 1.** New radio continuum surveys conducted with the Effelsberg 100-m telescope.

| Central freq.<br>(GHz) | Bandwidth<br>(GHz) | Wavelength<br>(cm) | Resolution<br>( $'$ ) | Map size<br>( $'$ ) | Principle<br>investigator |
|------------------------|--------------------|--------------------|-----------------------|---------------------|---------------------------|
| 2.64                   | 80                 | 11.4               | 4.4                   | 196 x 92            | Mulcahy (2011)            |
| 4.85                   | 300                | 6.2                | 2.6                   | 140 x 80            | Gießübel (2012)           |
| 8.35                   | 1100               | 3.6                | 1.4                   | 116 x 40            | Gießübel (2012)           |

observations at shorter wavelengths are needed, which would also provide higher angular resolution. Furthermore, the extension of magnetic fields into the outer disk and halo can be investigated by new surveys with higher sensitivity.

## 2. New Effelsberg surveys of M 31

Three deep radio continuum surveys of total and linearly polarized emission from M 31 have been conducted in recent years with the Effelsberg telescope (Table 1). At all wavelengths, the total and polarized emission is concentrated in a ring-like structure between about 7 kpc and 13 kpc radius from the center. Diffusion of cosmic rays away from star-forming regions is evident: The ring of synchrotron emission is wider than the ring of the thermal radio emission and the radial scale length of synchrotron emission is larger than that of thermal emission. The diffusion length along the ring, parallel to the disk, is  $\simeq 1.5$  kpc and the diffusion coefficient is  $D_E \simeq 2 \cdot 10^{28} \text{ cm}^2 \text{ s}^{-1}$ . Since M 31 has only a thin radio disk,  $D_E$  perpendicular to the disk is smaller by about a factor of 10.

Fig. 1 shows the polarized emission at 6.2 cm with the magnetic field orientations nicely following the ring. RM varies systematically along the ring (Fig. 2). The analysis shows a sinusoidal variation with azimuthal angle along the ring. The phase offset of  $7^\circ \pm 1^\circ$  is due to the spiral pitch angle and the RM offset of  $-125 \pm 2 \text{ rad/m}^2$  originates in the Galactic foreground. The amplitude of  $108 \pm 5 \text{ rad/m}^2$  is a clear signature of an axisymmetric regular magnetic field, confirming the previous results derived from RMs at longer wavelengths (Berkhuijsen et al. 2003). The amplitude is about 10% larger than previously measured, indicating that Faraday depolarization affected the previous data.

## References

- Beck, R. 1982, *A&A*, 106, 121  
 Beck, R. 2016, *A&A Rev*, 24:4  
 Beck, R., Brandenburg, A., Moss, D., Shukurov, A., Sokoloff, D. 1996, *ARAA*, 34, 155  
 Berkhuijsen, E.M., Beck, R., & Hoernes, P. 2003, *A&A*, 398, 937  
 Fletcher, A., Berkhuijsen, E.M., Beck, R., & Shukurov, A. 2004, *A&A*, 414, 53  
 Gießübel, R. 2012, PhD Thesis, University of Cologne  
 Mulcahy, D. 2011, MSc Thesis, University of Bonn

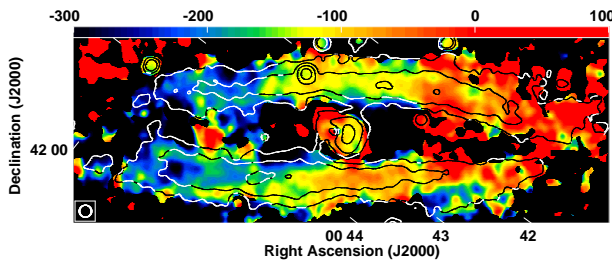

**Figure 2.** Faraday rotation measures (RM, in  $\text{rad/m}^2$ ), derived from the new surveys at 3.6 cm and 6.2 cm, at  $2.6'$  resolution. Contours show the polarized intensity at 6.2 cm.

# Reliable detection and characterization of low-frequency polarized sources in the LOFAR M 51 field

C. Horellou<sup>1</sup>, A. Neld<sup>1</sup>, D.D. Mulcahy<sup>2,3</sup>, R. Beck<sup>3</sup>, S. Bourke<sup>1</sup>,  
T.D. Carozzi<sup>1</sup>, K.T. Chyży<sup>4</sup>, J.E. Conway<sup>1</sup>, J.S. Farnes<sup>5</sup>, A. Fletcher<sup>6</sup>,  
M. Haverkorn<sup>5</sup>, G. Heald<sup>7,9</sup>, A. Horneffer<sup>1</sup>, B. Nikiel-Wroczyński<sup>4</sup>,  
R. Paladino<sup>8</sup>, S.S. Sridhar<sup>9</sup>, C.L. Van Eck<sup>5</sup>

<sup>1</sup>Chalmers Univ. of Technology, Dept of Space, Earth and Environment, 43992 Onsala, Sweden

<sup>2</sup>Jodrell Bank Centre for Astrophysics, Oxford Road, Manchester, M13 9PL, U.K.

<sup>3</sup>Max-Planck-Institut für Radioastronomie, Auf dem Hügel 69, 53121, Bonn, Germany

<sup>4</sup>Astronomical Observatory, Jagiellonian University, ul. Orla 171, 30-244 Kraków, Poland

<sup>5</sup>Dept of Astrophysics/IMAPP, Radboud Univ., PO Box 9010, 6500 GL, Nijmegen, NL

<sup>6</sup>School of Mathematics and Statistics, Newcastle Univ., Newcastle upon Tyne NE1 7RU, U.K.

<sup>7</sup>CSIRO Astronomy and Space Science, 26 Dick Perry Ave, Kensington, WA 6151, Australia

<sup>8</sup>INAF-Osservatorio di Radioastronomia, Via P. Gobetti, 101 I-40129 Bologna, Italy

<sup>9</sup>Kapteyn Astronomical Institute, Univ. of Groningen, Postbus 800, 9700 AV Groningen, NL

**Abstract.** We present a new source-finding algorithm for linearly polarized sources that we developed and applied to LOFAR data of the M 51 field. The reader is referred to a recently published paper by Neld et al. 2018 for more information.

**Keywords.** polarization – radio continuum: galaxies – galaxies: magnetic fields – galaxies: individual : M 51 – methods: data analysis – techniques: polarimetric

---

We have developed a computationally efficient and rigorously defined source-finding algorithm for linearly polarized sources. As the Square Kilometre Array (SKA) approaches completion, it is important to have tools to process large radio continuum datasets and extract reliable polarization information. Polarized extragalactic radio sources are interesting in their own right, and also as background sources to probe the magneto-ionized medium along their lines of sight via Faraday rotation, forming a dense Rotation Measure (RM) grid (e.g. Beck & Gaensler 2004).

We used a calibrated data set from the LOw Frequency ARray (LOFAR) at 150 MHz centered on the nearby galaxy M 51 to search for polarized background sources. The data have been presented earlier along with an analysis of a high-quality 150 MHz radio continuum image of the M 51 galaxy and a first investigation of background polarized sources in the field (Mulcahy et al. 2014). With a new imaging software, we re-imaged the field at a resolution of  $18'' \times 15''$  and cataloged a total of about 3000 continuum sources within  $2.5^\circ$  of the center of M 51. We made small Stokes  $Q$  and  $U$  images centered on each source brighter than 100 mJy in total intensity (201 sources) and used RM synthesis to create corresponding Faraday cubes that were analyzed individually. For each source, the noise distribution function was determined from a subset of the measurements at high Faraday depths where no polarization is expected; the peaks in polarized intensity in the Faraday spectrum were identified and the  $p$ -value of each source was calculated. Finally, the false discovery rate method was applied to the list of  $p$ -values to produce a list of polarized sources and quantify the reliability of the detections. We also analyzed

sources fainter than 100 mJy but that were reported as polarized in the literature at at least another radio frequency.

Of the 201 sources that were searched for polarization, six polarized sources were detected confidently (with a false discovery rate of 5%). This corresponds to a number density of one polarized source per 3.3 square degrees, or 0.3 source per square degree. Increasing the false discovery rate to 50% yields 19 sources. A majority of the sources have a morphology that is indicative of them being double-lobed radio galaxies, and the ones with redshift measurements from the literature have  $0.5 < z < 1.0$ . An example is shown in Fig. 1.

In the future, we intend to develop the code further and apply it to larger data sets such as the LOFAR Two-meter Survey of the whole northern sky, LoTSS (Shimwell et al. 2017), and the ongoing deep LOFAR observations of the GOODS-North field. A recent analysis of the first data release region of LoTSS (570 square degrees) at 4.3' resolution resulted in a preliminary catalog of 92 polarized sources (Van Eck et al. 2018); only one polarized source was identified in the M 51 field, while the work presented here yielded six secure detections. This demonstrates that the number of discovered polarized sources at low frequency should increase significantly when the data are imaged at higher angular resolution and new techniques are applied to extract the faint polarized signal.

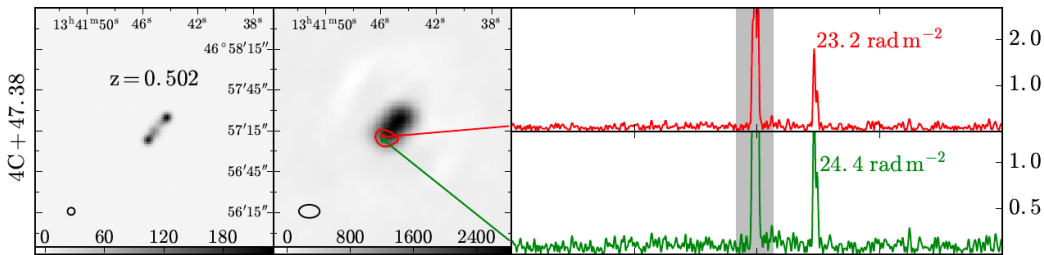

**Figure 1.** Example of a source (a double-lobed radio galaxy) at redshift  $z = 0.502$  detected in polarization in the LOFAR 150 MHz data with a 5% false discovery rate (Neld et al. 2018). *Left column:*  $3' \times 3'$  VLA FIRST 1.4 GHz images ( $5''$  resolution; Becker et al. 1995). *Middle column:*  $3' \times 3'$  LOFAR 150 MHz image ( $18'' \times 15''$  resolution). The synthesized beams of the images are displayed in the bottom left corners. *Right column:* The red and green colors are used to show Faraday spectra at two nearby locations in the source. The  $x$ -axis (Faraday depth,  $\phi$ ) ranges from  $-100$  to  $+100 \text{ rad m}^{-2}$ . The  $y$ -axis shows the polarized intensity in  $\text{mJy beam}^{-1} \text{ rmsf}^{-1}$ . The grey shading around  $\phi = 0$  shows the region of instrumental polarization that was excluded from the analysis.

## References

- Beck, R. & Gaensler, B. M. 2004, *New Astronomy Reviews*, 48, 1289  
 Becker, R. H., White, R. L., & Helfand, D. J. 1995, *ApJ*, 450, 559  
 Mulcahy, D. D., Horneffer, A., Beck, R., et al. 2014, *A&A*, 568, A74  
 Neld, A., Horellou, C., Mulcahy, D. D., et al. 2018, *A&A*, 617, A136  
 Shimwell, T. W., Röttgering, H. J. A., Best, P. N., et al. 2017, *A&A*, 598, A104  
 Van Eck, C. L., Haverkorn, M., Alves, M. I. R., et al. 2018, *A&A*, 613, A58

# The evolution of large scale magnetic fields in spiral galaxies

Luiz Felipe S. Rodrigues,<sup>1</sup> Luke Chamandy,<sup>2,3,4</sup> Anvar Shukurov,<sup>1</sup>  
Carlton M. Baugh<sup>5</sup> and A. Russ Taylor<sup>3,4</sup>

<sup>1</sup>School of Mathematics, Statistics and Physics, University of Newcastle,  
Newcastle upon Tyne, NE1 7RU, UK  
email: [luiz.rodriques@newcastle.ac.uk](mailto:luiz.rodriques@newcastle.ac.uk)

<sup>2</sup>Department of Physics and Astronomy, University of Rochester, 454 Bausch & Lomb Hall,  
Rochester, NY, 14627-0171, USA

<sup>3</sup>Astronomy Department, University of Cape Town, Rondebosch 7701,  
Republic of South Africa

<sup>4</sup>Department of Physics, University of the Western Cape, Belleville 7535,  
Republic of South Africa

<sup>5</sup>Institute for Computational Cosmology, Department of Physics, University of Durham,  
South Road, Durham, DH1 3LE, UK

**Abstract.** We investigate how the large scale magnetic fields in the discs of spiral galaxies evolve through cosmic time. To do this, we couple the galaxy properties computed by a semi-analytic model of galaxy formation to the mean field dynamo equations. These are solved numerically as a function of time and galactocentric radius for a thin disc using the no- $z$  approximation, with imposed axial symmetry, and the dynamical quenching non-linearity. A simple prescription for the evolution of the random (small-scale) magnetic field component and its relation with the mean (large-scale) component is adopted. This allows us to compute radial and time dependent properties of the interstellar medium of discs for a statistical sample of galaxies from  $z \sim 7$  until the present. We compute the distribution of the typical magnetic field strength at different redshifts and the dependence of these on galaxy mass. We examine the evolution of the growth rate of the mean disc magnetic fields of galaxies and discuss the steady state assumption. Finally, we analyse what is the sensitivity of our results to specific assumptions and to the galaxy formation model.

**Keywords.** galaxies: magnetic fields – dynamo – galaxies: evolution – galaxies: spiral

---

## 1. Introduction

The Square Kilometre Array and other forthcoming large radio telescopes will significantly increase the number and level of detail of observations of magnetic fields in galaxies, as well as their redshift evolution (e.g. [Taylor et al. 2015](#)). To be able to use these data to constrain both galaxy evolution models and galactic dynamo theory, it is necessary to have dynamo models which account for the variability of galaxies through time and predict the magnetic fields for a statistical sample of galaxies. We developed a framework – thoroughly described in [Rodrigues et al. \(2018\)](#) – to compute magnetic properties of spiral galaxies accounting for the formation history of individual galaxies computed by two versions the GALFORM semi-analytic galaxy formation model ([Lacey et al. 2016](#), [Gonzalez-Perez et al. 2014](#)).

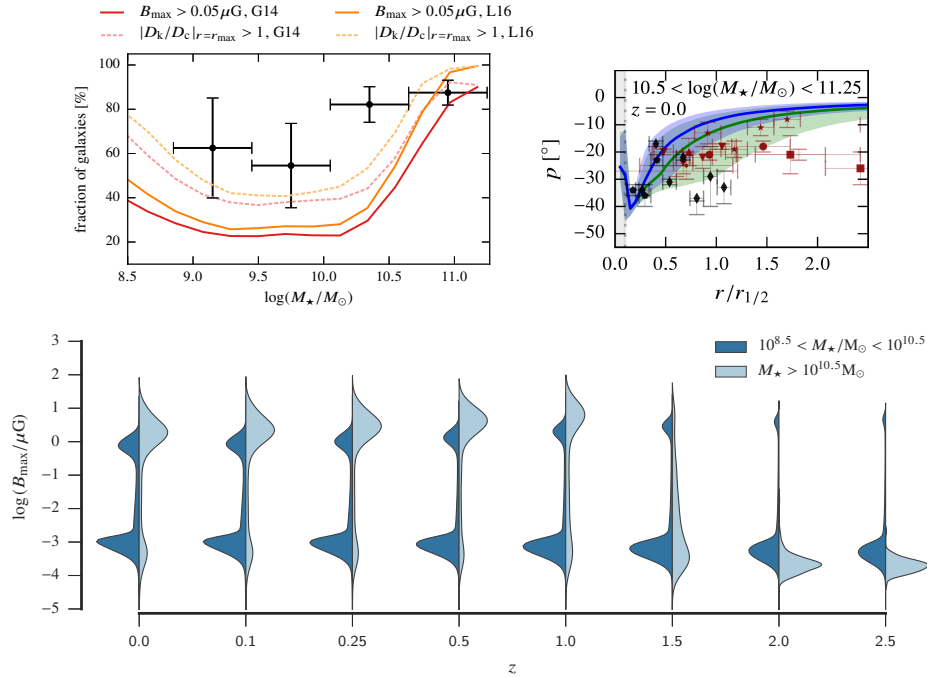

**Figure 1.** *Top-left.* The mass dependence of the fraction of galaxies containing non-negligible maximum magnetic field strength,  $B_{\max} > 0.05 \mu\text{G}$ . The black circles with error bars show the fraction of observed galaxies containing large-scale magnetic fields in the compilation of Beck & Wielebinski (2013) and stellar mass data from the S4G catalogue and other sources. *Top-right.* Comparison of the predicted pitch angle profiles of massive galaxies with observations in units of half mass radius,  $r_{1/2}$ . The blue and green curves show the median pitch angles predicted by the L16 and G14 models, respectively. The shaded areas show the intervals between 15 and 85 percentiles. Points with error bars show observational estimates (Chamandy et al. 2016). *Bottom.* Redshift evolution of the probability density of the maximum large-scale magnetic field strength of spiral galaxies for the L16 model, selected in two stellar mass bins at each redshift.

## 2. Results

We found that a significant fraction of the galaxies possess no large-scale magnetic field and that this depends on the mass of the galaxy, with a minimum close to  $M_* = 10^{10} M_\odot$  (top-left panel in Fig. 1). We find broad agreement with observational data for pitch angle in nearby galaxies (Fig. 1, top-right). The fraction of galaxies containing large-scale magnetic fields decreases with redshift; however if only galaxies which contain significant large-scale magnetic fields are selected ( $B \gtrsim 0.1 \mu\text{G}$ ), the typical field strength increases rapidly with redshift.

## Acknowledgements

LFSR and AS acknowledge financial support of STFC (ST/N000900/1, Project 2).

## References

- Beck R., Wielebinski R., 2013, *Magnetic Fields in Galaxies*. p. 641, arXiv:1302.5663v6  
 Chamandy L., 2016, *MNRAS*, 462, 4402  
 Gonzalez-Perez V., et al., 2014, *MNRAS* 439, 264 (G14)  
 Lacey C. G., et al., 2016, *MNRAS*, 462, 3854 (L16)  
 Rodrigues L. F. S., et al. 2018, *MNRAS* submitted, arXiv:1809.10521  
 Taylor R., et al., 2015, *Advancing Astrophysics with the SKA (AASKA14)*, p. 113



# The supernova-regulated ISM. Space- and time-correlations

J. F. Hollins<sup>1</sup>, G. R. Sarson<sup>1</sup>, A. Shukurov<sup>1</sup>, A. Fletcher<sup>1</sup> and F. A. Gent<sup>2</sup>

<sup>1</sup>School of Mathematics, Statistics and Physics, Newcastle University, Newcastle upon Tyne, NE1 7RU, UK

<sup>2</sup>ReSoLVE Centre of Excellence, Department of Computer Science, Aalto University, PO Box 15400, FI-00076 Aalto, Finland

email: j.hollins@newcastle.ac.uk (JFH), graeme.sarson@newcastle.ac.uk (GRS),  
anvar.shukurov@newcastle.ac.uk (AS), andrew.fletcher@newcastle.ac.uk (AF),  
frederick.gent@aalto.fi (FAG)

**Abstract.** We apply correlation analysis to determine the correlation lengths of the turbulent magnetic, density and velocity fields in numerical simulations of the Interstellar Medium (ISM). The simulations solve the magnetohydrodynamic (MHD) equations in a shearing, Cartesian box, driven by supernova (SN) explosions. We also estimate the correlation time of our simulations and investigate the anisotropy of the random magnetic field.

**Keywords.** Galaxies: ISM, ISM: kinematics and dynamics, ISM: magnetic fields, turbulence

---

## 1. Introduction

The interstellar medium of a spiral galaxy is a complex, multiphase, random system, driven by the input of thermal and kinetic energy from supernova explosions (SNe) and stellar winds. Statistical analysis of the ISM is complicated by its multi-phase structure: statistical parameters of the ISM vary strongly between the phases. This paper is a summary of the work detailed in Hollins et al. (2017).

## 2. A Numerical Model of the Multiphase ISM

Our analysis uses data from simulations of the multi-phase ISM based on the Pencil Code (<http://pencil-code.nordita.org/>). These simulations solve the full, compressible MHD equations in a shearing, Cartesian box  $1 \times 1 \times 2.2 \text{ kpc}^3$  in size, with a numerical resolution of  $\Delta x = 4 \text{ pc}$ . The parameters used are those typical of the Solar neighbourhood. Further details are provided in Gent et al. (2013a) and Gent et al. (2013b).

We consider the gas number density fluctuations,  $n'$ , and the magnitudes of the random velocity,  $u'$ , and random magnetic field,  $b$ . We also consider the Cartesian components of the random magnetic field  $\mathbf{b}$ . Our analysis focuses on the warm phase of the ISM, which occupies most of the domain (between 80 and 90% of the volume). We also perform calculations in the whole domain to investigate the importance of separating into phases.

## 3. The Integral and Temporal Scales

Reliable results are obtained for the spatial correlation functions, as shown in Figure 1. The results for  $n'$  and  $b$  in the both warm phase and where no phase separation is applied are very similar. Thus, the correlation statistics for both  $n'$  and  $b$  are most

**Table 1.** The correlation lengths of the fluctuations in gas density, speed and magnetic field for the warm gas and for the total gas at the mid-plane  $z = 0$  and  $|z| = 400$  pc.

|                     | $ z $ [pc] | $l_0$ [pc] |             |            |
|---------------------|------------|------------|-------------|------------|
|                     |            | $n'$       | $u'$        | $b$        |
| Warm phase          | 0          | $53 \pm 5$ | $60 \pm 3$  | $44 \pm 2$ |
|                     | 400        | $37 \pm 2$ | $87 \pm 3$  | $64 \pm 2$ |
| No phase separation | 0          | $44 \pm 2$ | $74 \pm 2$  | $51 \pm 1$ |
|                     | 400        | $37 \pm 2$ | $117 \pm 3$ | $66 \pm 1$ |

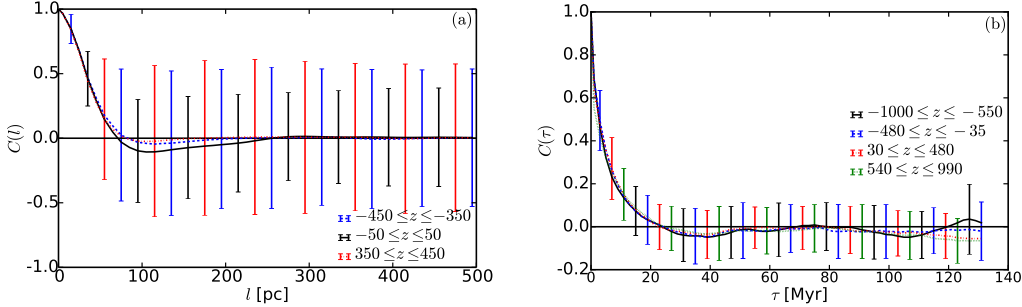

**Figure 1.** (a) The spatial correlation functions for  $n'$  in the warm gas, averaged about  $z = -400$  pc (blue, dashed),  $0$  pc (black, solid), and  $400$  pc (red, dash-dotted), and (b) the time correlation functions of  $u'$ , averaged in layers  $-1000 \leq z \leq -550$  pc (black, solid),  $-480 \leq z \leq -35$  pc (blue, dashed),  $30 \leq z \leq 480$  pc (red, dash-dotted), and  $540 \leq z \leq 990$  pc (green, dotted). The error bars denote scatter about the mean.

strongly influenced by the behaviour of these fields in the warm phase. For the non phase-separated  $u'$ , the root-mean-square (rms) velocity is roughly 1.5 larger than for the warm phase and the correlation length,  $l_0$ , is roughly 15–30 pc greater at each height, suggesting the hot phase has a larger impact on the correlation statistics for  $u'$ .

The correlation time of our simulations, computed from the correlation functions in Figure 1(b), is approximately  $\tau_0 = 5$  Myr throughout the domain. We calculate the eddy turnover time using  $l_0$  and the rms value for  $u'$  in the warm phase. At the mid-plane,  $\tau_{\text{eddy}} \approx 8$  Myr. Thus,  $\tau_{\text{eddy}}$  is a reasonable estimate of  $\tau_0$ .

The standard deviations of the turbulent magnetic field components  $b_x/b_y/b_z$  have approximate ratios 0.5/0.6/0.6 in the mid-plane, suggesting mild anisotropy in the random magnetic field. The enhanced azimuthal ( $y$ ) component is a result of the large-scale velocity shear due to differential rotation. The vertical ( $z$ ) component is amplified beyond isotropy by the stretching of the horizontal magnetic field by the vertical velocity  $u_z$ . The polarisation degree of the synchrotron emission due to this level of anisotropy in the random magnetic field, is approximately 15%.

## References

- Gent F. A., Shukurov A., Fletcher A., Sarson G. R., Mantere M. J., *MNRAS*, 432, 1396–1423, 2013a  
 Gent F. A., Shukurov A., Sarson G. R., Fletcher A., Mantere M. J., *MNRAS*, 430, L40–L44, 2013b  
 Hollins J. F., Sarson G. R., Shukurov A., Fletcher A., Gent, F. A., *ApJ*, 850, 4, 2017

# Magnetic field effects on the ISM structure and galactic outflows

A. Shukurov<sup>1</sup>, C. C. Evirgen<sup>1</sup>, A. Fletcher<sup>1</sup>, P. J. Bushby<sup>1</sup> and  
F. A. Gent<sup>2</sup>

<sup>1</sup>School of Mathematics, Statistics and Physics, Newcastle University, Newcastle upon Tyne,  
NE1 7RU, U.K.

emails: [anvar.shukurov@ncl.ac.uk](mailto:anvar.shukurov@ncl.ac.uk) (AS), [c.c.evirgen@ncl.ac.uk](mailto:c.c.evirgen@ncl.ac.uk) (CCE),  
[andrew.fletcher@ncl.ac.uk](mailto:andrew.fletcher@ncl.ac.uk) (AF), [paul.bushby@ncl.ac.uk](mailto:paul.bushby@ncl.ac.uk) (PJB)

<sup>2</sup>Department of Computer Science, Aalto University, Otaniemi, ESPOO, Finland  
email: [frederick.gent@aalto.fi](mailto:frederick.gent@aalto.fi)

**Abstract.** The role of magnetic fields in the multi-phase interstellar medium (ISM) is explored using magnetohydrodynamic (MHD) simulations that include energy injection by supernova (SN) explosions and allow for dynamo action. Apart from providing additional pressure support of the gas layer, magnetic fields reduce the density contrast between the warm and hot gas phases and quench galactic outflows. A dynamo-generated, self-consistent large-scale magnetic field affects the ISM differently from an artificially imposed, unidirectional magnetic field.

**Keywords.** MHD, ISM: kinematics and dynamics, ISM: magnetic fields, ISM: structure, ISM: jets and outflows, galaxies: ISM, galaxies: magnetic fields, galaxies: spiral

---

Our understanding of global magnetic effects in spiral galaxies remains limited despite a growing appreciation of their significance. Of particular importance is the role of magnetic fields (and of the cosmic rays controlled by them) in galactic outflows and the resulting feedback of star formation on galactic evolution. Studies of magnetic effects in the ISM are hindered by its complex, multi-phase structure and by the complexity of the conversions between kinetic and magnetic energies in random flows (addressed by dynamo theory). Furthermore, observational estimates of magnetic field strength are restricted to the warm and cold ISM phases whereas galactic outflows are driven by the hot gas.

Simulations of the SN-driven ISM have reached a sufficient level of physical adequacy to use them as numerical experiments to explore various effects inaccessible to direct observations. Among such simulations, only a few contain the ingredients (especially differential rotation and stratification) required to simulate large-scale dynamo action (Gressel *et al.* 2008, Gent *et al.* 2013).

We analyse a numerical model of the local ISM, developed by Gent *et al.* (2013), that produces an exponentially growing magnetic field at a scale comparable to the size of the computational domain (1 kpc), starting from a dynamically negligible seed magnetic field and reaching a statistically steady state where magnetic, random kinetic and thermal energy densities are comparable in magnitude. The ISM is represented in three phases separated in terms of specific entropy (or density and temperature) while magnetic field consists of both the mean and fluctuating parts. The SN activity supports a systematic outflow away from the mid-plane. Comparing the ISM properties in the initial and late stages, where magnetic fields are, respectively, negligible and dynamically significant, we can assess the role of magnetic fields in the structure and properties of the ISM. Both stages represent statistically steady states without and with magnetic field, respectively. The most significant magnetic effects are as follows (Evirgen *et al.* 2018).

**Table 1.** Fits to the outflow speed, of the form (1), at various distances  $|z|$  from the mid-plane.

| Distance to the mid-plane [kpc] | $V_0$ [km s $^{-1}$ ] | $\xi$ | $n$ |
|---------------------------------|-----------------------|-------|-----|
| $ z  < 0.15$                    | 11                    | 4.4   | 2.7 |
| $0.15 <  z  < 0.3$              | 17                    | 2.4   | 2.4 |
| $0.3 <  z  < 0.6$               | 17                    | 3.9   | 1.9 |
| $0.6 <  z  < 1.0$               | 11                    | 2.5   | 1.5 |

*The multi-phase structure.* In agreement with the topological analysis of Makarenko *et al.* (2018), we show that strong local magnetic fields efficiently confine SN remnants, leading to a lower fractional volume of the hot gas (decreasing from 25% to 9% near the mid-plane as magnetic field grows), its lower temperature and higher density (by a factor of 3–10), whereas the total mass of the hot gas varies little. As a result, the density contrast between the warm and hot phases is reduced by almost an order of magnitude.

*Outflow speed.* As the magnetic field grows, the mean speed of the systematic gas outflow  $V_z$  away from the mid-plane decreases from about 20 km s $^{-1}$  for a weak magnetic field to just a few km s $^{-1}$  when magnetic field becomes strong. The decrease is rather abrupt:  $V_z$  is only weakly dependent upon the magnetic field when the mean magnetic field  $B$  is weaker than that corresponding to energy equipartition with the random gas flow,  $B_{\text{eq}} = (4\pi\rho v^2)^{1/2}$ , where  $\rho$  is the gas mass density and  $v$  the root-mean-square random speed. However, it then decreases as a rather high power of  $B$ ,

$$V_z \simeq V_0 [1 + \xi(B/B_{\text{eq}})^n]^{-1}, \quad (1)$$

with the values of  $V_0$ ,  $\xi$  and  $n$  given in Table 1. In similar simulations, Bendre *et al.* (2015) also find that the outflow is suppressed by the large-scale magnetic field although they find a weaker dependence of  $V_z$  on  $B$  with  $n = 2$  (and  $V_0 \approx 13$  km s $^{-1}$  and  $\xi \approx 1.5$  at  $|z| = 0.8$  kpc). The value of  $V_0$  depends on the supernova rate  $\nu$ ; Bendre *et al.* (2015) find  $V_0 \propto \nu^{0.4}$ . We note that the value of  $V_0$  at large  $|z|$  is likely to be sensitive to the size of the computational domain: simulations of Bendre *et al.* (2015) in  $|z| \leq 2$  kpc find larger values of  $V_z$  at  $|z| \simeq 1$  kpc than in our model where  $|z| \leq 1$  kpc.

*The importance of dynamo action.* The sensitivity of the ISM structure and outflow speed to magnetic field is only obtained in simulations that admit large-scale dynamo action (Bendre *et al.* 2015, Evirgen *et al.* 2018). Broadly similar simulations where dynamo action is precluded and a unidirectional magnetic field is imposed (e.g., de Avillez & Breitschwerdt 2005, Henley *et al.* 2015, Girichidis *et al.* 2016) do not reveal any similar magnetic effects. This contradiction requires careful analysis; it suggests rather strongly that dynamo action that produces a large-scale magnetic field responding *self-consistently* to the ISM environment is essential to capture reliably magnetic effects on the ISM.

## References

- Bendre, A., Gressel, O., & Elstner, D. 2015, *AN*, 336, 991  
de Avillez, M. A., & Breitschwerdt, D. 2005, *A&A*, 436, 585  
Evirgen, C. C., Gent, F. A., Shukurov, A., Fletcher, A., & Bushby, P. 2018, *MNRAS*, submitted  
Gent, F. A., Shukurov, A., Fletcher, A., Sarson, G. R., & Mantere, M. J. 2013, *MNRAS*, 432, 1396  
Girichidis, P., Walch, S., Naab, T., Gatto, A., Wünsch, R., Glover, S. C. O., Klessen, R. S., Clark, P. C., Peters, T., Derigs, D., & Baczynski, C. 2016, *MNRAS*, 456, 432  
Gressel, O., Elstner, D., Ziegler, U., & Rüdiger, G. 2008, *A&A*, 486, L35  
Henley, D. B., Shelton, R. L., Kwak, K., Hill, A. S., & Mac Low, M.-M. 2015, *ApJ*, 800, id. 102  
Makarenko, I., Shukurov, A., Henderson, R., Rodrigues, L. F. S., Bushby, P., & Fletcher, A. 2018, *MNRAS*, 475, 1843

# Magnetic fields and CR propagation in the halos of spiral galaxies

Marita Krause<sup>1</sup>, Silvia C. Mora-Partiarroyo<sup>1</sup> and Philip Schmidt<sup>1</sup>

<sup>1</sup>Max-Planck-Institut für Radioastronomie,  
Auf dem Hügel 69, D-53121 Bonn, Germany  
email: mkrause@mpifr-bonn.mpg.de

**Abstract.** With CHANG-ES, the Continuum HALos in Nearby Galaxies – an EVLA Survey, we detected for the first time large-scale magnetic fields in the halos of nearby edge-on spiral galaxies. We further determined in a consistent way the vertical radio scale heights of a subsample of 13 spiral galaxies, as a crucial parameter to understand the CR propagation in the halo. Our sample galaxies are consistent with advective CR propagation and we concluded that galactic winds are a widespread phenomenon in spiral galaxies. We discovered a tight correlation of the normalized scale heights with the mass surface density, giving the first observational evidence for a gravitational effect on the CR outflow.

**Keywords.** galaxies: spiral, galaxies: halos, galaxies: magnetic fields, radio continuum: galaxies

---

## 1. Regular magnetic fields in the halo

The magnetic field  $B$  in spiral galaxies is usually a composition of a small-scale (up to several 10 pc) random component, an ordered component, and a large-scale regular ( $\gtrsim 1$  kpc) component. The ordered component may be the result of compression/shearing of the random component, yielding polarized intensity, however no significant net Faraday rotation along the line of sight. Only the detection of a smooth pattern over several beam sizes in the rotation measure  $RM$  is a clear sign of a regular large-scale magnetic field. The sign of the  $RM$  (or Faraday depth in case of  $RM$  synthesis) gives directly the magnetic field direction along the line of sight.

Usually, the large-scale magnetic field  $B_{reg}$  in the disk of a spiral galaxy is an axisymmetric spiral magnetic field (ASS) along the disk (as observed in face-on galaxies) which is thought to be generated by an  $\alpha - \omega$  dynamo. In the halo of edge-on galaxies vertical and X-shaped magnetic fields are observed in linear polarization. Only the analysis of the  $RM$  pattern in the halo can give information about a possible regular magnetic field there, which is now for the first time revealed by the CHANG-ES observations.

CHANG-ES is a radio continuum and polarization survey of 35 nearby spiral galaxies seen edge-on, performed with the EVLA in C-band (5 - 7 GHz) and L-band (1.3 - 1.9 GHz), using different array configurations (Irwin et al. 2012). Many galaxies of this sample show extended linear polarization in their halos.  $RM$  synthesis of these galaxies revealed for the first time large-scale  $RM$  patterns in halos, implying, together with the vectors of linear polarization, the existence of regular halo magnetic fields with scales  $\geq 800$  pc (see Fig. 1, left). In the upper halo of NGC 4631 the regular magnetic fields seem to form large-scale helical magnetic loops (Mora-Partiarroyo et al. 2019). The regular fields in the halo may be former disk fields that were transported into the halo by galactic winds (see below).

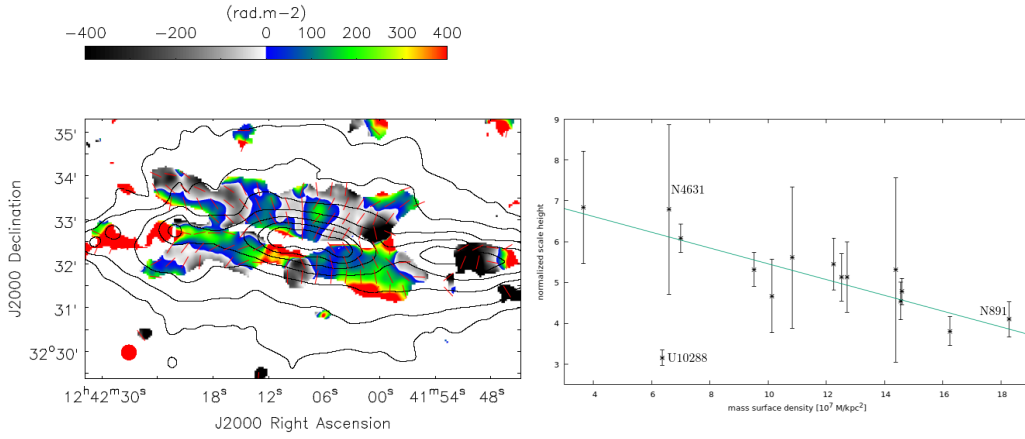

**Figure 1.** (Left): Distribution of Faraday depth obtained from C-band (D-array) data, overlaid with intrinsic magnetic field vectors, with an angular resolution of  $20.5''$  HPBW (Mora-Partiarroyo et al. 2019). (Right): Normalized scale heights in C-band vs. mass surface density.

## 2. CR propagation in the halo

The halos of spiral galaxies, as the interface between the galactic disk and the IGM, are formed of gas, dust, cosmic rays, and magnetic fields. Their total radio continuum emission is dominated by synchrotron emission due to cosmic ray (CR) electrons in the halo magnetic field. CRs are regarded to be accelerated by supernova shock fronts in the galactic disk. The shape and extent of a radio halo is related to CR propagation (diffusion or advection) from the galactic disk and CR energy losses (synchrotron losses), where the vertical scale height of the radio emission is an important parameter to distinguish between the different processes.

We determined the radio scale heights in C- and L-band in a consistent way for a CHANG-ES subsample of 13 galaxies (smaller than  $5'$ ), having carefully checked for missing spacings effects (Krause et al. 2018). The sample average value for the radio scale heights of the halo are  $1.1 \pm 0.3$  kpc in C-band and  $1.4 \pm 0.7$  kpc in L-band.

We discovered that the radio scale heights  $h$  depend mainly on the radio diameter  $d$  of the galaxy, implying that smaller galaxies are more spherical in radio emission than larger galaxies. The (absent) frequency dependence of the normalized scale heights  $\tilde{h}$  (defined as  $100 \cdot h/d$ ) led us to the conclusion that the sample galaxies are escape-dominated with advective CR propagation, indicating the existence of galactic winds in many spiral galaxies. We could not find any dependence of  $h$  or  $\tilde{h}$  on star formation rate ( $SFR$ ) or  $SFR$  density, and hence confirmed that the radio scale heights are not simply dictated by star formation in the disk. Moreover, we detected a tight correlation of  $\tilde{h}$  with the mass surface density of the galaxies, and hence for a gravitational influence on the CR outflows. This could recently be confirmed also for larger galaxies like NGC 4631 (Mora-Partiarroyo et al. 2019), and NGC 891 (Schmidt et al. 2019), presented together with the CHANG-ES subsample of 13 galaxies (Krause et al. 2018) in Fig. 1, right.

## References

- Irwin, J., Beck, R., Benjamin, R.-A., et al. 2012, *AJ*, 144, 44  
 Krause, M., Irwin, J., Wiegert, T., et al. 2018, *A&A*, 611, A72  
 Mora-Partiarroyo, S.C., Krause, M., Basu, A., et al. 2019, *A&A*, submitted  
 Schmidt, P., Krause, M., Heesen, V., et al. 2019, *A&A*, submitted

# Magnetic field constraint in the outskirts of spiral galaxies

Ericson Lopez<sup>1,2</sup> Jairo Armijos<sup>1</sup> Mario Llerena<sup>1</sup> Franklin Aldaz<sup>1</sup>

<sup>1</sup>Quito Astronomical Observatory, National Polytechnic School,  
Box 17-01-165 Quito, Ecuador  
email: ericsson.lopez@epn.edu.ec

<sup>2</sup>Physics Department, Sciences Faculty, National Polytechnic School,  
Box 17-01-2759 Quito, Ecuador

**Abstract.** Based on CO(2-1) public data, we study the monoxide oxygen gas excitation conditions and the magnetic field strength of NGC 2841, NGC 3077, NGC 3184, NGC 3351 spiral galaxies. For their galaxy outskirts, we found kinetic temperatures in the range of 35–38 K, CO column densities  $10^{15} - 10^{16} \text{ cm}^{-2}$  and H<sub>2</sub> masses of  $4 \cdot 10^6 - 6 \cdot 10^8 M_{\odot}$ . An H<sub>2</sub> density  $10^3 \text{ cm}^{-3}$  is suitable to explain the 2 sigma upper limits of the CO(2-1) line intensity. We constrain the magnetic field strength for our sample of spiral galaxies and their outskirts, evaluating a simplified expression of the magneto-hydrodynamic force equation. Our estimations provide values for the magnetic field strength in the order of 6–31  $\mu\text{G}$ .

**Keywords.** galaxies: halos, galaxies: magnetic fields, galaxies: spiral.

---

## 1. Introduction

In this work, we study the magnetic field strength in the outskirts of four spiral galaxies: NGC 2841, NGC 3077, NGC 3184, NGC 3351, following a different approach to those commonly based on Faraday rotation, dust polarization, synchrotron emission, and so on. To constrain the magnetic field strength of spiral galaxies we will follow the Dotson method (Dotson 1996), i.e., approaching the magneto-hydrodynamic force equation to derive a simple expression that let us to estimate the upper limit of the magnetic field. On the other hand, to estimate the density  $n$  and mass  $M$  of the sources, we use the carbon monoxide emission as a tracer for the molecular gas H<sub>2</sub> (Neininger et al. 1998). This is because H<sub>2</sub> is invisible in the cold interstellar medium, at temperatures around 10–20 K.

## 2. Treatment of Carbon Monoxide Data

To carry out this study we use public CO(2-1) data, first published by Leroy et al. (2009), data obtained with the IRAM 30 m telescope located in Spain. To derive  $n$  and  $M$  from the CO(2-1) data we have selected the spectra by choosing two positions; one located in the nucleus and the second located on the outskirts of the galaxy.

## 3. Magnetic fields in the galaxies and their outskirts

Gaussian fits to the CO(2-1) lines have been performed. Then, the Large Velocity Gradient (LVG) modeling (van der Tak et al. 2007) is employed to estimate the gas density ( $n$ ), based on the CO(2-1) line width ( $\Delta V$ ) and the line intensity ( $I$ ). To estimate CO integrated luminosity ( $L_{CO}$ ), we use the inner ellipse for the nuclear

| Galaxy name | Region    | $L_{CO}$<br>$\times 10^6 \text{ K km s}^{-1} \text{ pc}^2$ | $r$<br>kpc | $M_{H_2}$<br>$\times 10^7 M_\odot$ | $(M_{H_2}+M_{HI})$<br>$\times 10^8 M_\odot$ | $B$<br>$\mu\text{G}$ |
|-------------|-----------|------------------------------------------------------------|------------|------------------------------------|---------------------------------------------|----------------------|
| NGC 2841    | disk      | 2.0                                                        | 8.5        | 103.0                              | 89.6                                        | $\lesssim 31$        |
|             | outskirts | ...                                                        | ...        | ...                                | ...                                         | ...                  |
| NGC 3077    | disk      | 2.3                                                        | 0.4        | 1.3                                | 0.4                                         | $\lesssim 6$         |
|             | outskirts | $\lesssim 0.7$                                             | 0.8        | $\lesssim 0.4$                     | $\lesssim 0.1$                              | $\lesssim 7$         |
| NGC 3184    | disk      | 188.0                                                      | 6.6        | 103.0                              | 36.8                                        | $\lesssim 14$        |
|             | outskirts | $\lesssim 81.1$                                            | 13.2       | $\lesssim 44.6$                    | $\lesssim 15.9$                             | $\lesssim 19$        |
| NGC 3351    | disk      | 226.0                                                      | 7.1        | 124.0                              | 32.1                                        | $\lesssim 11$        |
|             | outskirts | $\lesssim 109.0$                                           | 14.2       | $\lesssim 59.8$                    | $\lesssim 15.5$                             | $\lesssim 15$        |

**Table 1.** Parameters derived for the galaxy sample

region (the  $L_{CO}$  will be used later to estimate  $H_2$  masses). To constrain the magnetic field strength for a given galaxy and its outskirts, we use the expression  $B < 3.23 \times 10^{-8} \left(\frac{R}{pc}\right)^{0.5} \left(\frac{n}{cm^{-3}}\right)^{0.5} \left(\frac{M}{M_\odot}\right)^{0.5} \left(\frac{r}{pc}\right)^{-1}$  given by Dotson (1996). This relation includes the  $n_{H_2}$ , the mass  $M$  and radius  $r$  of the galaxy, and the radius of curvature  $R$  of the magnetic field lines. The  $n_{H_2}$  and  $M$  were derived using observational data, however the mass that we use here is referred to the dust mass which is obtained by the relation  $(M_{H_2}+M_{HI})/100$ , i.e. assuming the typical dust-to-gas mass ratio of 0.01. The molecular hydrogen mass ( $M_{H_2}$ ) for the galaxy disk and its outskirts is derived using the relation  $\frac{M_{H_2}}{M_\odot} = 5.5 \frac{R_{21}}{0.8} \left(\frac{L_{CO}}{K km s^{-1} pc^2}\right)$  given by Leroy et al. (2009), where  $R_{21}$  is the CO(2-1)/CO(1-0) line intensity ratio equal to 0.8 and  $L_{CO}$  is the CO luminosity. In this relation, a CO(1-0)/ $H_2$  conversion factor of  $2 \times 10^{20} \text{ cm}^{-1} (\text{K km s}^{-1})^{-1}$  has been adopted (Leroy et al. 2009).

#### 4. Discussion and Conclusions

In the present contribution, we have estimated the magnetic field strength in the galaxy nuclei and in the outskirts of NGC 2841, NGC 3077, NGC 3184, NGC 3351 spiral galaxies. For that, we have used an approximated expression of the magneto-hydrodynamics to find an upper limit for the magnetic field magnitudes. The magnetic field strength lies within the range of  $\lesssim 6-31 \mu\text{G}$ , which are in good agreement with the values provided by other author for spiral galaxies. A first good idea about the strength of the magnetic field is possible to obtain directly from the estimation of molecular hydrogen mass and radio of the source, without the necessity of a magneto-hydrodynamic model or using a traditional technique like Faraday rotation or Zeeman line broadening. This is a rough estimation that works if the gas pressure is uniform and the viscosity is neglected. A better approach can be obtained keeping more term in the magneto-hydrodynamics force equation (Dotson 1996) to impede gravitational collapse.

#### References

- Dotson, J. L. 1996, *ApJ*, 470, 566  
 Neininger, N., Gulin, M., Ungerechts, H., et al. 1998, *Nature*, 1998, 395, 871-873  
 Leroy, A. K., Walter, F., Bigiel, F., et al. 2009, *ApJ*, 2009, 137, 4670-4696  
 Van der Tac, F. F. S.; Black, J. H.; Schier, F. L., et al. 2007, *A&A*, 468, 2, 627-635



# The CHANG-ES Galaxy NGC 4666

Yelena Stein<sup>1,2</sup>, Ralf-Jürgen Dettmar<sup>2</sup>, Judith Irwin<sup>3</sup> and the  
CHANG-ES Team

<sup>1</sup>Observatoire astronomique de Strasbourg, Université de Strasbourg, CNRS, UMR 7550, 11  
rue de l'Université, 67000 Strasbourg, France; email: [yelena.stein@astro.unistra.fr](mailto:yelena.stein@astro.unistra.fr)

<sup>2</sup>Fakultät für Physik und Astronomie, Astronomisches Institut, 44780 Bochum, Germany;  
email: [dettmar@astro.rub.de](mailto:dettmar@astro.rub.de), *presenting author*

<sup>3</sup>Dept. of Physics, Engineering Physics, & Astronomy, Queen's University, Kingston, Ontario,  
Canada, K7L 3N6

**Abstract.** We investigate the radio continuum radiation of the edge-on spiral galaxy NGC 4666 from the 'Continuum Halos in edge-on spiral galaxies - an EVLA survey (CHANG-ES)'. The radio data in two frequencies (6 GHz, C-band and 1.5 GHz, L-band) are used to analyze the magnetic field structure and the transport processes of the cosmic ray electrons.

**Keywords.** galaxies: magnetic fields, galaxies: spiral, galaxies: starburst, galaxies: halos, radio continuum: galaxies

---

## 1. Introduction

Synchrotron radiation in the radio continuum of edge-on spiral galaxies allow us to determine the magnetic field structure and distribution of the disk and the halo. Additionally, by analyzing the synchrotron intensity, the transport processes of cosmic rays into the halo of edge-on spiral galaxies can be investigated. Here we present first results for the edge-on spiral galaxy NGC 4666 with CHANG-ES radio data. These data will be analyzed in Stein et al. (submitted) in more detail. The CHANG-ES sample contains 35 edge-on spiral galaxies observed with the JVLA in B-, C- and D-configuration in C- and L-band (see e.g. Wiegert et al. 2015). NGC 4666 is a frequently studied starburst galaxy (Lehnert & Heckman 1996) and considered a superwind galaxy with a prominent X-ray halo (Dahlem et al. 1997, Tüllmann et al. 2006).

## 2. Synchrotron polarizaton

The orientation of the polarized emission follow an X-shaped magnetic field pattern (see Fig. 1), as visible in many edge-on spiral galaxies (Tüllmann et al. 2000), which shows mostly disk parallel vectors within the disk and vertical field components in the halo.

## 3. 1-D cosmic ray transport model

Transport processes of cosmic ray electrons into the halo (perpendicular to the galaxy disc) are derived using a 1-D cosmic ray transport model with the program SPINNAKER (Heesen et al. 2016, 2018). We used an interactive PYTHON wrapper (Spinteractive, by A. Miskolczi) to apply the model to the non-thermal radio maps. The thermal/non-thermal separation was executed following Vargas et al. (2018). Using SPINNAKER, we find a good solution for advection with an advection speed of 310 km/s, which is a little

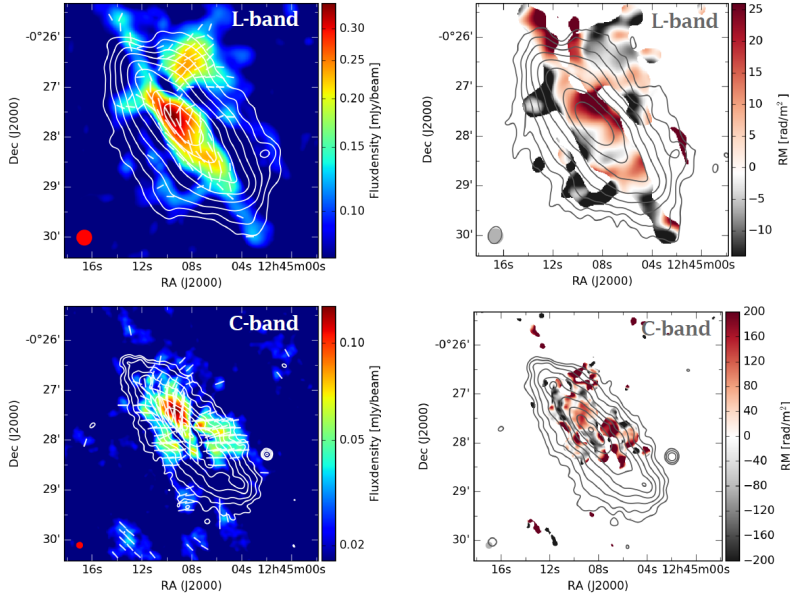

**Figure 1.** Left column: resulting polarization maps (polarized intensity in color on Stokes I contours and orientation of the polarized emission) from rotation measure synthesis (RM-synthesis). Right column: resulting rotation measure (RM) maps, which represent a measure for the direction of the magnetic field along the line of sight.

higher than the escape velocity. This results and further discussions will be presented in Stein et al. (submitted).

#### 4. Possible magnetic field reversals in the disk field

The analysis of the RM map from C-band indicates magnetic field reversals in the disk field of NGC 4666 (Stein et al. submitted). The analysis of RM values in a rectangular box on the RM map shows in the inner disk the approaching side of the galaxy shows mainly positive RM values, the receding side shows mainly negative RM values. This behavior is expected for the axisymmetric case ( $m=0$ ) with magnetic field vectors pointing inwards. For larger radii ( $> 30''$ ) this behavior of the RM values change into the opposite. The approaching side shows mainly negative RM values whereas the receding side shows mainly positive values. This indicates an axisymmetric field pointing outwards. A sinusoidal fit was applied separately to both sides with a resulting comparable scale length of  $75'' \pm 10''$ .

#### References

- Dahlem, M., Petr, M. G., Lehnert, M. D., Heckman, T. M., & Ehle, M. 1997, *A&A*, 320, 731  
 Heesen, V., Dettmar, R.-J., Krause, M., Beck, R., & Stein, Y. 2016, *MNRAS*, 458, 332  
 Heesen, V., Krause, M., Beck, R., et al. 2018, *MNRAS*, 476, 158  
 Lehnert, M. D. & Heckman, T. M. 1996, *ApJ*, 472, 546  
 Stein, Y., Dettmar, R.-J., Irwin, J., et al. submitted, *A&A*  
 Tüllmann, R., Dettmar, R.-J., Soida, M., Urbanik, M., & Rossa, J. 2000, *A&A*, 364, L36  
 Tüllmann, R., Pietsch, W., Rossa, J., Breitschwerdt, D., & Dettmar, R. 2006, *A&A*, 448, 43  
 Vargas, C. J., Mora-Partiarroyo, S. C., Schmidt, P., et al. 2018, *ApJ*, 853, 128  
 Wiegert, T., Irwin, J., Miskolczi, A., et al. 2015, *AJ*, 150, 81

# Faraday rotation from magnetic fields in young galaxies

Sharanya Sur

Indian Institute of Astrophysics, 2nd Block Koramangala, Bangalore - 560034, India  
email: [sharanya.sur@iiap.res.in](mailto:sharanya.sur@iiap.res.in)

**Abstract.** In the recent past, Mg II absorption systems probed by a number of authors has revealed the existence of magnetic fields in young galaxies that are of comparable strength to those observed in nearby galaxies. In this contribution we argue that such strong fields can naturally arise due to *Fluctuation* dynamo action. Aided by numerical simulations, we then show that such dynamo generated fields are sufficiently coherent with the rms value of Faraday rotation measure (RM) of the order of 45 - 55 per cent of the value expected in a model where fields are assumed to be coherent on the forcing scale of turbulence. This yields a random RM  $\sim 16 - 48 \text{ rad m}^{-2}$  in agreement with observational estimates from Mg II absorption systems. Our results can thus account for the observed RMs in young galaxies.

**Keywords.** galaxies : high-redshift, magnetic fields, MHD, turbulence

---

## 1. Introduction

Mg II absorption systems probed by Bernet *et al.* (2008, 2010), Farnes *et al.* (2014), and Joshi & Chand (2013) reveal that galaxies out to redshifts  $z \sim 1$  are magnetized with  $\mu\text{G}$  strength fields, comparable to those observed in nearby galaxies. The origin of such strong magnetic fields at an epoch when the Universe was only  $\sim 6 \text{ Gyr}$  old remains a challenge. It is plausible that these fields are generated by *Fluctuation* dynamos (Kazantsev 1968) - a process by which weak seed magnetic fields embedded in a conducting fluid are amplified exponentially fast (on eddy-turnover time scales  $\sim 10^7 \text{ yr}$  in galaxies) by random stretching of the field lines by turbulent eddies. In the context of young galaxies, the ability of the dynamo to amplify fields on such short time scales together with the fact that its excitation only requires a critical  $\text{Rm}_{\text{cr}} \sim (100 - 300)$  makes them an ideal candidate for generating and maintaining fields in these objects. However, from the observational point of view it is crucial to explore if the saturated fields generated by the dynamo are coherent enough and the extent to which the Faraday rotation measure (RM) obtained from such fields compares with observational estimates from Mg II absorption systems. Furthermore, the interstellar medium (ISM) in young galaxies is highly compressible and fields generated by the fluctuation dynamo are intermittent in nature. It is then natural to ask how sensitive is the RM to regions of different field strengths and densities? These issues form the subject of our discussion here.

## 2. Results

To address our objectives, we adopt a numerical approach focussing on simulations of fluctuation dynamo action in non-helicity forced turbulence using the FLASH<sup>†</sup> code (Fryxell *et al.* 2000). For more details on the setup and initial conditions we refer the reader to Sur *et al.* (2018). Apart from revealing evidence of turbulent stretching, the density snapshots in Fig. 1 (left image, top row) shows the effects of compressibility while field structures (bottom row) appear to be intermittent and less space filling. These 3D volumes are to be thought of as representing a local patch of the ISM containing a few turbulent cells. Since, the fields generated by the fluctuation dynamo are statistically

<sup>†</sup> <http://flash.uchicago.edu/site/flashcode/>

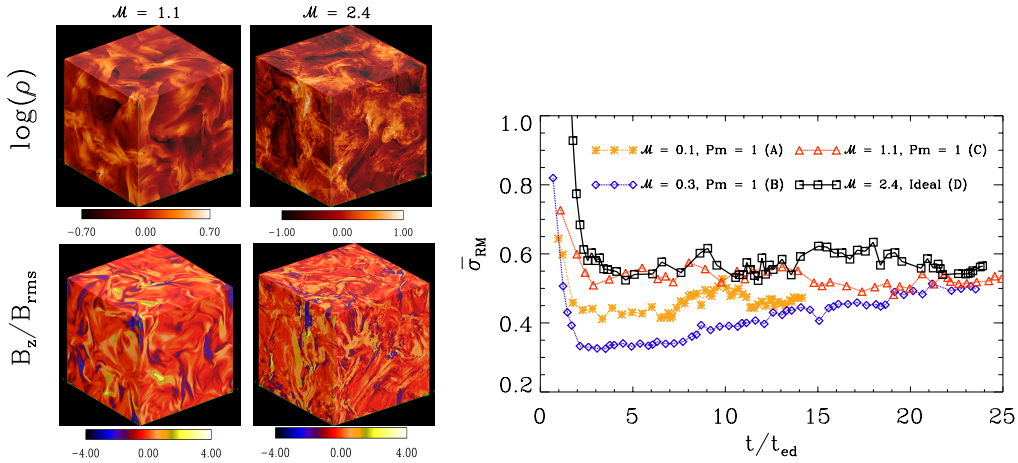

**Figure 1.** **Left** : 3D volume rendering of the density (top row) and the  $B_z/B_{\text{rms}}$  (bottom row) for a transonic and supersonic run in the nonlinear phase. **Right** : Evolution of  $\bar{\sigma}_{\text{RM}}$  as a function of  $t/t_{\text{ed}}$ . See Sur *et al.* (2018) for more details.

isotropic, the mean RM is zero. Therefore, to probe the degree of coherence of the field we compute the time evolution of the normalized standard deviation of RM,  $\bar{\sigma}_{\text{RM}} = \sigma_{\text{RM}}/\sigma_0$  by shooting  $3N^2$  lines-of-sight (LOS) through these volumes (right plot in Fig. 1). Here  $\sigma_0$  is the standard deviation of RM obtained by assuming the random magnetic fields to be coherent on the forcing scale of turbulence and  $N$  is the number of grid points in each dimension. We find that irrespective of the compressibility of the flow,  $\bar{\sigma}_{\text{RM}} = 0.45 - 0.55$  in the saturated state. This implies that the fluctuation dynamo generated fields are sufficiently coherent to obtain a significant amount of RM. The dominant contribution to the RM in the transonic case comes from the general sea of volume filling fields while in the supersonic case, strong field regions as well as moderately over dense regions contribute significantly to the RM (Sur *et al.* 2018).

### 3. Discussion and Conclusions

Our results show that up to  $\mathcal{M} = 2.4$  probed here  $\bar{\sigma}_{\text{RM}} = 0.45 - 0.55$  in the saturated state, independent of the Mach number of the flow. Such values of  $\bar{\sigma}_{\text{RM}}$  lead to a random RM  $\sim 16 - 48 \text{ rad m}^{-2}$  for sightlines passing through the disk. While Faraday RM probes the LOS magnetic field, synchrotron emissivity and its polarization are also useful tracers of magnetic fields in the plane of sky. In a future work, we plan to extend our analysis by exploring these observables which together with the Faraday RM are indispensable for stitching a complete picture of magnetic fields in young galaxies.

### Acknowledgements

I thank Pallavi Bhat and Kandaswamy Subramanian for collaborations and discussions.

### References

- Bernet, M.L., et al., 2008, *Nature*, 454, 302
- Bernet, M. L., Miniati, F., Lilly S. J., 2010, *ApJ*, 711, 380
- Farnes, J. S., O’Sullivan, S. P., Corrigan, M. E., Gaensler, B. M. 2014, *ApJ*, 795, 63
- Fryxell B., et al. 2000 *ApJS*, 131, 273
- Joshi, R., & Chand, H. 2013 *MNRAS*, 434, 4
- Kazantsev, A. P. 1968 *Sov. J. Exp. Theor. Phys.*, 26, 1031
- Sur, S., Bhat, P., & Subramanian, K. 2018 *MNRAS* (Letters), 475, 1
